# Supplementary material for: Annotating Nontargeted LC-HRMS/MS Data with Two Complementary Tandem Mass Spectral Libraries
Source: Metabolites. 2018 Dec 23;9(1):3. doi: 10.3390/metabo9010003 (PMC6359582; doi:10.3390/metabo9010003)
Supplement: Supplementary file 1 [file metabolites-09-00003-s001.zip › Supplementary-Tables-1,2,3,4_Overview_on_Identified_Compounds.xlsx]

## Sheet: Table S1
Table S1: Overview of compounds identified by systematic toxicological analysis of ten authentic plasma samples
Compound	Precursor ion m/z	PubChem CID	Sample 1		Sample 2		Sample 3		Sample 4		Sample 5		Sample 6		Sample 7		Sample 8		Sample 9		Sample 10
			m/z error	amp	m/z error	amp	m/z error	amp	m/z error	amp	m/z error	amp	m/z error	amp	m/z error	amp	m/z error	amp	m/z error	amp	m/z error	amp
1-(3-chlorophenyl)piperazine	197.084	1355															-0.0008	24.2
11-hydroxy-delta(9)-tetrahydrocannabinol	331.227	37482							-0.0008	16.92
11-nor-delta(9)-tetrahydrocannabinol-9-carboxylic_acid	345.206	107885					-0.0029	19.04	-0.0002	22.83			-0.0011	17.32					0	20.98
25-hydroxyvitamine D3	401.341	5283731	-0.0063	20.08	-0.0029	23.82	-0.0008	17.46	-0.0017	30.82	-0.0019	11.65	-0.0004	28.24	-0.0028	21.91	-0.0011	29.04	-0.0044	26.33	-0.0053	28.59
2-ethylidene-1,5-dimethyl-3,3-diphenylpyrrolidine	278.19	5352621			-0.0005	40.1							-0.001	38.09
2-hydroxybenzothiazole	152.017	13625			-0.0007	22.48	-0.001	34.41			-0.0007	29.85	-0.0006	38.65	-0.0001	29.14	-0.0003	36.92	-0.0003	29.87	-0.0003	33.03
2-mercaptobenzothiazole	167.994	697993	-0.0005	35.54	-0.0007	17.44	-0.0006	37.02	-0.0005	37.7	-0.0003	33.65	-0.0007	36.76	-0.001	21.08	-0.0006	37.72	-0.0003	35.44	-0.0006	37.69
2-phenyl-1H-benzo[d]imidazole-6-sulfonic_acid	275.048	33919	-0.0012	33.46	0.0003	37.18	-0.0002	40.33	-0.0008	31.71	-0.0003	31.63	-0.0004	28.23	0.0001	33.44	0.0006	27.73	-0.0027	31.7	-0.0004	40.35
4-acetamidoantipyrine	246.124	65743																	-0.0011	19.85
4-formylaminoantipyrine	232.108	72666																	0.0001	19.48
6-o-monoacetylmorphine	328.154	5462507							-0.0011	16.08
7-aminoclonazepam	286.074	188298															-0.0002	39.35	0	39.04
7-aminoflunitrazepam	284.119	92294															-0.0001	37.53	0.0004	31.86
8-hydroxy mirtazapine	282.16						0.0005	11.96
acetaminophen	152.071	1983							-0.0008	34.28									-0.0003	37.35
adenosine	268.104	60961	-0.0007	22.79	-0.0022	12.96	0.0016	16.3			0.001	21.94	-0.001	31.58			-0.0008	16.43			-0.0013	9.34
alpha-hydroxyalprazolam	325.085	162244			-0.0004	5.85
alprazolam	309.09	2118			-0.0008	42.56			0.0002	36.18
ampyrone	204.113	2151																	0	39.29
anhydroecgonine	168.102	101709													-0.0006	28.96	-0.0016	46.8
anhydroecgoninemethyl ester	182.118	119478													-0.0001	30.21
antipyrine	189.102	2206																	-0.0009	23.24
arginine	175.119	232									-0.0008	30.93
benzoylecgonine	290.139	2340			-0.0009	21.91			0	25.93					-0.0003	32.34	-0.0008	30.13	0.001	35.03
benzyl-butyl-phthalate	313.143	2347	-0.0031	17.35															-0.0004	19.21
buprenorphine	468.311	5311033					-0.0015	17.51
butylparaben	195.102	7184	-0.0021	8.7	-0.0029	9.6	-0.001	10.94	0.0006	9.85			-0.0018	5.64	-0.0013	11.6			-0.0007	14.61
butylscopolammonium	360.217	452294			-0.0014	13.77
caffeine	195.088	2519	-0.0009	28.52	-0.0004	29.03	-0.0006	29.08	0	26.04			-0.0002	27.28	-0.0006	26.76	0.0001	25.03	0	29.35	-0.0007	26.87
cannabidiol	315.232	644019							0.0006	21.47
carnitine	162.113	288	-0.0006	48.16	-0.0007	53.05	-0.0003	47.17	-0.0014	54.01	-0.0002	47.89	-0.0006	42.93	0.0002	47.22	-0.0003	47.17	-0.0002	42.84	-0.0002	47.68
chlorpromazine	319.103	2726			-0.0002	5.74
chlorprothixene	316.092	2729	-0.0019	43.26			-0.0016	23.4
cinnamoylcocaine	330.17	20054874			0.0003	26.38			0.0003	22.23			-0.0015	18.85	0.0031	8.65	0.0012	26.55	0.0017	25.33
cocaethylene	318.17	65034													0.0013	19.7
cocaine	304.154	5760			-0.0002	11.62									-0.0007	21.95	0	21.25	0.0006	7.05
codeine	300.159	5284371							0.0025	30.42
corticosterone	347.222	5753			0.0001	28.84	-0.0006	33.93	-0.0002	35.13	-0.0006	27.07	0.0002	34.66	-0.0001	26.69	0.0008	37.01	-0.001	37.29	0	25.44
cortisone	361.201	222786	-0.0021	31.49	-0.0005	32.71	0.0001	35.34	-0.0002	31.33	0.0007	33.58	-0.0011	29.44	-0.0014	28.36			-0.0004	35.86	-0.0032	35.04
cotinine	177.102	408			-0.0008	43.88	-0.0002	26.75	0.0001	44.17			-0.0004	54.59	-0.0001	27.74	-0.0008	45.56	-0.0006	49.08
creatine	132.077	586	-0.0003	14.53	-0.0003	19.14	0.0001	18.14	-0.0001	21.31	-0.0003	21.95	-0.0009	22.8	0.0005	10.81	-0.0003	21.84			-0.0004	19.59
creatinine	114.066	588	0.0006	12.72	0.0006	9.02	0.0004	11.27	-0.0007	8.49	0.0008	15.69	0.0013	13.01	0.001	5.12	0.0007	7.95
desmethyl mirtazapine	252.15	10467350					-0.0006	20.94
diazepam	285.079	3016	0.0014	5.37			-0.0006	39.79			0	36.34	-0.0005	38.2			-0.0011	39.48	-0.001	39.17
dibenzothiazyldisulfide	332.964	8447	-0.0031	16.45	0.0021	22.9	-0.0003	9.78	-0.001	37.35			-0.0015	46.71	-0.0006	53.41	0.0013	53.47	-0.001	27.94
dihydrocodeine	302.175	5284543			-0.0007	33.4
diphenylguanidine	212.118	7594	-0.0015	33.46	-0.0002	31.69	-0.0002	33.45	0.0003	31.72	0.0003	32.39	-0.0018	42.01	0.0002	29.25	-0.0017	39.68	-0.0009	31.52	-0.0006	33.45
dosulepin	296.147	5282426	-0.0045	7.5
ecgoninemethylester	200.128	104904													-0.0015	33.05	-0.0013	25.6
ethylecgonine	214.144	18656861													-0.0001	32.9
ethylparaben	167.07	8434	-0.0006	9.48			-0.0022	9.6									0.0011	22.82	-0.0004	11.08
flunitrazepam	314.094	3380															0.0025	17.24
gabapentin	172.133	3446			-0.0011	26.76
glutamic_acid	148.06	611	0	8.42			-0.0009	14.76					-0.0001	29.22	-0.0005	9.34	-0.0008	15.04	-0.0009	10.76	-0.0001	30.46
glutamine	147.077	738	-0.0014	10.37	-0.0008	19.33	-0.0004	20.56	0	15.72	-0.0002	21.69			-0.0003	17.05	-0.0002	18.68	-0.0003	19.98	-0.0007	20.15
glutathione	308.091	124886															0.0002	23.42
glycyrrhetinic acid	471.347														-0.0014	19.65
histidine	156.077	773	-0.0016	24.15	-0.0005	20.95	-0.0004	41.28	-0.0002	41.4	0.0002	21.65	-0.0008	40.68	-0.0013	24.5	-0.0005	40.63	0.0064	34.39	-0.0002	41.44
hydrocortisone	363.217	5754	-0.0022	36.04	0.0001	36.61	-0.0012	37.68	-0.0005	37.62	-0.0011	33.55	-0.0011	35.61	0.0005	32.93	0.0004	36.89	0	37.73	-0.0004	38.58
hydroxy mirtazapine	282.16						0.0005	12.71
hydroxy prothipendyl	302.132		-0.0024	45.55
hydroxy quetiapine	400.169																0.0008	56.44	-0.0006	56.38
hydroxy trazodone	388.154																0.0019	26.23
hypoxanthine	137.046	790	-0.0004	44.9	-0.0003	35.1	-0.0002	42.01	-0.0002	48.61	0.0002	44.84	-0.0003	32.79	0.0003	41.3	-0.0004	42.01	0	41.34	0.0001	41.16
inosine	269.088	6021	-0.0011	48.03	-0.0001	48.03	-0.0007	48.02	-0.0003	48.03	0.0006	47.84			-0.0014	48.02			-0.002	48.03
isoleucine	132.102	791	-0.0002	27.05	-0.0006	28.08	-0.0009	24.9	-0.0012	25.8	-0.0007	31.02	-0.0006	23.66	-0.0003	30.74	-0.0009	24.49	-0.0011	23.21	0	24.92
kynurenine	209.092	846	-0.0011	51.56	-0.0005	49.49	-0.0004	52.06	-0.0001	51.63	-0.0005	49.46	-0.0012	51.81	-0.0005	42.28	0	47.47	-0.0003	51.46	-0.0003	51.6
leucine	132.102	857	-0.0006	9.53			0	12.53					-0.0004	10.64
levodopa	198.076	6047					-0.0024	19.67			-0.0003	25.99	-0.0033	24.41	-0.0033	16.35			-0.0031	19.57	-0.0004	17.41
linoleic acid	281.248	5280450	-0.0025	35.23	-0.0019	31.92	-0.0009	25.44	-0.0012	34.24	0.0001	24.98	-0.0002	39.21	-0.0077	19.66	-0.0011	28.44	0.0094	36.6	-0.0005	31.77
lisinopril	406.234	5362119	-0.0017	27.72																	-0.0014	31.19
lysine	147.113	866	-0.0007	36.74	-0.0003	40.33	-0.0008	31.25	-0.0004	33.73	-0.0003	31.11	-0.0006	28.47			-0.0007	38.43	-0.0003	33.74	-0.0003	35.41
metformin	130.109	4091	-0.0005	43.56
methadone	310.217	4095			-0.001	32.82							-0.0005	33.43
methionine	150.058	876	-0.0009	36.62	-0.0009	39.69	-0.0007	39.26	-0.0006	39.18	-0.0003	38.34	-0.001	39.71	-0.0004	39.23	-0.0005	40.88	-0.0005	37.23	-0.0007	38.36
methotrimeprazine	329.168	3916											-0.0005	29.17
mirtazapine	266.165	4205					0.0002	36.42											-0.0011	25.01
mirtazapine N-glucuronide	442.197						-0.0005	47.86
morphine	286.144	5980							-0.0002	17.93	0.0006	28.81	-0.0008	32.44			-0.0008	21.4	0.0001	21.17
morphine glucuronide	462.176	5484731							-0.0009	33.72	-0.0008	32.7	0.0007	40.1			0.0012	34.33	0.0002	33.12
moxifloxacin	402.182	152946									0.001	18.03
naproxen	231.102	1302											-0.0003	35.86
N-desalkyl quetiapine	296.122												-0.0004	20.62			-0.0006	35.76	0.0004	18.57
desalkyl verapamil	291.207										-0.0009	43.61
neocuproine	209.107	65237					-0.0008	24.53
nicotinamide	123.055	936	0.0002	38.22	-0.0003	33.15	-0.0002	41.9	-0.0003	37.67	-0.0003	38.43	-0.0004	38.23	0.0005	35.87	-0.0017	38.95	0.0001	41.34	-0.0005	39.28
nicotine	163.123	89594			-0.0009	41.06	-0.0006	40.02	-0.0012	39.47	0.0006	21.06			-0.0009	39.5			-0.0003	37.16
norbuprenorphine	414.264	6426801					-0.0031	18.46
norcocaine	290.139	597722													-0.0007	34.14
nordazepam	271.063	2997	-0.0034	9.22	-0.001	43.5	-0.0003	43.41			-0.0001	43.3	-0.0002	44.33			-0.0005	43.46	0.0002	44.47
norflutoprazepam	289.054	4540									0.0002	43.4
octocrylene	362.212						-0.0016	19.69	0.0004	17.78	-0.0008	12.51			-0.0081	19.53					-0.0018	14.59
O-desmethyl verapamil	441.275										-0.0006	28.16
ornithine	133.097	389			-0.0004	43.72	-0.0003	32.94							0	32.99	-0.0004	43.64	-0.0003	48.02	0.0002	32.93
oxazepam	287.058	4616	-0.0026	32.57	-0.0007	30.63	-0.001	31.33			-0.0007	21.21	-0.0006	29.86			-0.0002	31.32	-0.002	29.85
oxazepam glucuronide	463.09	160870			-0.0009	20.04	-0.0011	25.3					0.0003	20.33					-0.0009	16.05
oxyquinoline	146.06	1923	-0.0001	29.55	0.0001	23.17	-0.0008	26.7	-0.0008	28.55	-0.0007	22.47	-0.0007	25.16	-0.0003	23.19	-0.0005	21.36	-0.001	26.35	-0.0012	23.05
pantoprazole	384.082	4679	-0.0042	27.07							-0.001	31.28
phenylalanine	166.086	994	-0.0006	36.43	-0.001	38.35	-0.0001	41.69	-0.0006	38.22	-0.0006	33.97	-0.0012	42.01	0.0002	21.11	-0.0001	42.03	-0.0008	43.94	-0.0008	41.67
phenylurea	137.071	6145													-0.0002	24.39	-0.0002	19.72
phthalic acid dibutyl ester	279.159	3026	-0.0012	50.42	-0.0017	50.43	-0.0004	43.33	-0.0013	50.35	-0.0003	50.19	-0.0003	43.29	-0.0004	50.18	-0.0003	50.41	0.0001	43.32	-0.0011	50.39
phthalic acid diethyl ester	223.096	6781									-0.0005	13.35	-0.0021	6.54
pioglitazone	357.127	4829	-0.0024	34.47
piperine	286.144	638024	-0.0013	33.59	-0.0003	16.99	-0.0006	8.74	0.0005	30.21			-0.0021	20.55	-0.0006	24.01	-0.0021	24.09			-0.002	28.74
prednisolone	361.201	5755									-0.0003	29.69
pregabalin	160.133	5486971			-0.0007	36.21							-0.0005	34.12			-0.0003	21.38	-0.001	25.28
proline	116.071	614	-0.0001	60.72	0.0003	42.15	0.0001	52.28	-0.0004	30.59	-0.0006	40.63	-0.0003	40.94	0.0001	40.76	-0.0003	60.79	0	44.85	-0.0003	61.91
propylparaben	181.086	7175	-0.0007	7.65
prothipendyl	286.137	14670	-0.0024	41.52
pseudocumidine	136.112	8717							-0.0011	17.72	-0.0006	17.52			0.0003	19.31			-0.0002	12.02	-0.0007	20.92
quetiapine	384.174	5002																	-0.0005	21.62
rosuvastatin	482.176	446157	-0.0064	34.58
serotonin	177.102	5202	-0.0018	33.41	-0.0014	34.22	-0.0018	38.45			-0.0008	33.57			-0.0015	34.43			0.0003	39.43
spermine	203.223	1103			-0.0013	9.67											-0.0007	16.07
temazepam	301.074	5391			-0.0006	36.58	0.0008	43.74			0.0005	27.78	-0.0003	36.59			0.0004	43.77	0.0001	31.93
testosterone	289.216	6013	-0.0013	40.79	-0.001	40.82			-0.001	39.83					0	44.43	-0.0007	39.11	-0.0004	31.63	-0.0006	37.61
theobromine	181.072	5429	-0.0023	25.86	-0.0009	23.07	0.0001	23.52	-0.0011	18.95			-0.0011	18.8	-0.0002	19.9	0	18.88	-0.0007	18.01	-0.0026	18.4
theophylline	181.072	2153	-0.0012	13.59	-0.0003	17.86	-0.0002	19.06	-0.0001	14.61			-0.0007	15.6	-0.0003	13.3	-0.0001	11.91	-0.0002	16.63	-0.0006	14.61
thiamine	265.112	1130			-0.0004	24.99	-0.0003	13.76	0.0009	15.06											-0.0011	33.58
thymine	127.05	1135											-0.0009	57.39
trazodone	372.159	5533	-0.0048	19.01													-0.0001	23.81
tri(butoxyethyl)phosphate	399.251	6540							-0.0011	16.24
tributylphosphate	267.172	31357	-0.0017	19.24			-0.0007	31.94			0	24.01	-0.0024	16			-0.0007	9.58	0.0001	23.99
triiodothyronine	651.797	5920			-0.0031	24.3
triphenylphosphate	327.078	8289							-0.0007	25.22	-0.0015	31.28					-0.0038	12.94	0.0011	8.67
tryptophan	205.097	1148	-0.0005	37.81	-0.0002	37.63	-0.0017	41.32	-0.0018	40.67	0.0008	36.14	-0.0004	33.15	-0.0006	37.6	-0.0008	34.35	0.0004	37.54	-0.001	39.47
tyrosine	182.081	1153	-0.0012	43.37	-0.0001	43.34	-0.0008	43.34	-0.0004	42.08	-0.0002	40.02	-0.0012	38.21	-0.0008	44.17	-0.0004	39.01	-0.0004	43.32	-0.0004	43.23
urapidil	388.234	5639									-0.0016	32.28
valin	118.086	1182	0.0005	46.47	-0.0004	48.59	0.0001	43.82	-0.0002	39.67	-0.0004	43.55	-0.0003	44.99	-0.001	38.33	-0.0006	51.88	-0.0001	38.87	0.0005	50.28
vitamin D3	385.346	5280795	-0.0033	17.54	-0.0038	29.75			0.0008	18.47	-0.0023	27.75			-0.0019	21.22	-0.0025	22.09	-0.0021	24.81	-0.0038	22.08
xanthine	153.041	408611	-0.0007	37.79	-0.0011	34.37			0	37.71	0	31.57	-0.0006	34.77	-0.0005	31.57	-0.0011	34.38	-0.0003	32.16	-0.0011	31.53
zolpidem carboxylic acid	338.15										-0.0002	29.38

## Sheet: Table S2
Table S2: Overview of compounds identified by non-targeted LC-MS/MS in ten wastewater samples collected at the influent of the WWTP in Innsbruck
Compound	Precursor ion m/z	PubChem CID	1.4.16		2.4.16		3.4.16		4.4.16		5.4.16		6.4.16		7.4.16		8.4.16		9.4.16		10.4.16
			m/z error	amp	m/z error	amp	m/z error	amp	m/z error	amp	m/z error	amp	m/z error	amp	m/z error	amp	m/z error	amp	m/z error	amp	m/z error	amp
10,11-trans-dihydroxy-10,11-dihydrocarbamazepine	271.108	114725	-0.0041	30.93	-0.0028	30.86	-0.0047	34.15	-0.0033	30.93	-0.0029	32.47	-0.0029	32.47	-0.0048	30.98	-0.0035	32.49	-0.0024	30.88	-0.0016	28.68
1H-benzotriazole	120.056	7220	-0.0026	20.56	-0.0026	18.29	-0.0022	18.22	-0.0024	23.19	-0.0021	20.49	-0.0021	20.49	-0.0022	20.48	-0.0031	20.49	-0.0022	20.46	-0.0034	20.41
2-ethylidene-1,5-dimethyl-3,3-diphenylpyrrolidine	278.19	5378015	-0.0049	18.87	-0.0037	17.9	-0.004	34.41	-0.0019	23.36	-0.0052	26.1			-0.0036	25.04	-0.0031	19.88			-0.0048	30.43
3,4-methylenedioxymethamphetamine	194.118	1615	-0.0052	9.95	-0.0036	19.19	-0.0045	19.97	-0.0043	14.33	-0.004	12.17							-0.004	21.89	-0.0045	18.97
4,4'-bipyridyl	157.076	11107			0.005	17.45	0.0042	33.26	0.004	34.44
4-acetamidoantipyrine	246.124	65743	-0.004	23.27	-0.0023	27.37	-0.0038	26.1	-0.0041	25.51	-0.0032	26.08	-0.0032	26.08	-0.0039	27.42	-0.0043	26.04	-0.0031	25.11	-0.0034	24.33
4-aminoacetophenone	136.076	7468			-0.0046	20.18	-0.0053	18.33					-0.0057	16.68	-0.0032	14.68	-0.0031	22.5			-0.0043	19.87
4-aminoantipyrine	204.113	2151	-0.0027	13.7					-0.0026	8.83			-0.0057	16.68	-0.0027	15.57	-0.0028	14.15			-0.0059	13.31
4-formylaminoantipyrine	232.108	72666	-0.0036	20.6	-0.0049	20.19	-0.0036	21.01	-0.0033	18.21	-0.0054	20.58	-0.0054	20.58	-0.0038	20.23	-0.0036	20.56	-0.0053	19.48	-0.0049	18.47
5-methyl-1H-benzotriazole	134.071	8705	-0.0017	28.32	-0.0023	31.33	-0.003	30.78	-0.0031	29.69	-0.002	30.09	-0.002	30.09	-0.0024	30.06	-0.0024	28.39	-0.0022	31.56	-0.0033	29.22
6-o-monoacetylmorphine	328.154	5462507	-0.0034	10.22									-0.0024	12.13	-0.0046	11.18	-0.0029	15.69	-0.0032	12.53
abacavir	287.161	441300			-0.0034	32.48	-0.0035	31.67	-0.0045	25.5	-0.0016	32.48	-0.0049	22.3	-0.004	36.52	-0.0028	30.17	-0.0059	31.72	-0.0058	24.36
acetaminophen	152.071	1983	-0.0036	34.21	-0.0024	33.99	-0.0036	34.18	-0.0028	33.02	-0.0026	34.47	-0.0034	33.49	-0.0031	33.43	-0.0033	34.62	-0.0022	34.15	-0.0021	34.13
acyclovir	226.094	2022			-0.0043	14.92	-0.004	8.74			-0.0053	12.46
adenine	136.062	190	-0.0024	40.94	-0.0034	32.73	-0.003	44.55	-0.0031	40.53	-0.0036	30.78	-0.0027	40.98	-0.0031	37.78	-0.003	40.95	-0.004	37.82	-0.0033	40.92
adenosine	268.104	60961	-0.0034	21.84	-0.0022	21.79	-0.0035	14.52	-0.004	21.82	-0.0023	21.84	-0.0039	21.81	-0.0042	21.84	-0.004	21.08	-0.0026	21.81	-0.0018	31.63
allopurinol	137.046	2094	-0.0028	8.73	-0.0036	12.81	-0.0027	10.13	-0.0032	14.41	-0.0024	11.99			-0.0028	13.64	-0.0034	12.83	-0.0022	10.85	-0.0038	11.95
amantadine	152.143	2130																			-0.0045	20.12
amisulpride	370.18	2159	-0.0052	43.59	-0.0026	50.83	-0.0037	50.7	-0.0043	43.56	-0.0029	44.44	-0.005	50.77	-0.0041	43.64	-0.0048	41.74	-0.0027	44.54	-0.003	50.78
amitriptyline	278.19	2160									-0.0063	10.27
amphetamine	136.112	3007					-0.0033	18.87	-0.0029	11.87			-0.0024	15.62
antipyrine	189.102	2206	-0.0035	18.47							-0.0045	16.36			-0.0042	21.32			-0.0042	22.18	-0.0048	21.92
atenolol	267.17	2249	-0.0031	22.7			-0.0035	24.73
atenolol acid	268.154	62936					-0.0039	26.51							-0.004	28.9
baclofen	214.063	2284			-0.0046	17.84															-0.0047	15.2
benzidine	185.107	7111	-0.0037	11.41	-0.0017	13.4			-0.0032	12.64											-0.0035	14.6
benzothiazole	136.022	7222	-0.0034	11.68	-0.0025	10.11			-0.0027	10.03					-0.003	10.11	-0.0025	10.07	-0.0017	12.89	-0.0022	10.05
benzoylecgonine	290.139	2340	-0.0048	33.09	-0.0025	34.24	-0.0046	34.23	-0.003	33.21	-0.0027	34.93	-0.0038	33.22	-0.0048	34.36	-0.0047	35.3	-0.003	34.3	-0.0053	33.63
bisoprolol	326.233	2405	-0.004	23.92	-0.0064	24.97	-0.0039	30.8	-0.0034	29.54	-0.0027	27.6	-0.0033	23.41	-0.0041	25.81	-0.0048	26.31	-0.0029	26.78	-0.0035	20.42
bupropion	240.115	444					-0.0026	12.32
caffeine	195.088	2519	-0.0028	27.7	-0.0042	27.75	-0.0027	28.56	-0.0028	25.96	-0.0021	26.16	-0.0026	27.33	-0.0031	27.7	-0.0027	27.08	-0.0044	25.89	-0.0027	26.42
carbamazepine	237.102	2554	-0.003	26.25	-0.0059	40.88	-0.0025	32.09	-0.0036	39.92	-0.005	41.32	-0.0027	34.33	-0.0035	36.94	-0.0037	31.08	-0.0055	40.61	-0.0051	39.57
carbamazepine-10,11-epoxide	253.097	2555	-0.0035	42.02			-0.0031	38.63	-0.0037	40.76	-0.0029	41.94	-0.0029	41.94	-0.0037	33.14	-0.0032	38.76	-0.0045	42.04	-0.0029	30.99
cephalexin	348.101	27447	-0.0042	10.98											-0.0041	11.23			-0.0026	12.56	-0.0014	11.54
cetirizine	389.163	2678			-0.008	36.85	-0.0048	21.69	-0.004	23.9	-0.0089	28.92	-0.0055	19.13					-0.0064	18.68	-0.0052	18.77
cetrimonium	284.331	5974	-0.0033	7.78	-0.0053	30.48	-0.0032	26.17			-0.0061	40.63	-0.0045	14.67					-0.0056	45.66	-0.0055	60.73
ciprofloxacin	332.14	2764	-0.0052	20.11	-0.006	25.81	-0.0036	29.07	-0.0033	27.5	-0.0067	28.79	-0.0067	20.38			-0.0039	19.6	-0.0043	26.66	-0.0027	18.57
climbazol	293.105	37907					-0.0032	17.66	-0.0034	13.17	-0.0058	16.37							-0.0055	20.89	-0.0051	19.96
clindamycin	425.187	29029	-0.0045	5.91															-0.0026	11.48
cocaine	304.154	5760											-0.0044	17.73	-0.0046	14.36					-0.0057	9.92
codeine	300.159	5284371	-0.0048	19.97	-0.0028	21.8	-0.0028	18.07	-0.004	14.79	-0.0023	21.16	-0.0054	15.72	-0.0045	14.49					-0.0047	12.56
corticosterone	347.222	5753			-0.0036	20.66	-0.0043	22.21	-0.005	22.48	-0.0042	22.73	-0.0042	22.73	-0.0034	21.2	-0.0029	21.72	-0.003	21.12	-0.0018	19.85
cortisone	361.201	222786															-0.0053	13.05
cotinine	177.102	408	-0.0032	24.91			-0.0025	28.6	-0.0032	28.86	-0.0031	30.58	-0.003	28.2			-0.0043	25.47	-0.0026	29.61	-0.0046	22.52
desalkyl verapamil	291.207		-0.0047	39.27	-0.0065	37.89	-0.0046	38.61	-0.0041	39.32	-0.0063	35.69			-0.004	37.81	-0.0035	21.04	-0.0057	35.52	-0.0061	38.33
desmethyl citalopram	311.156		-0.0048	11.54	-0.002	19.39	-0.0042	20.48	-0.0047	16.93	-0.0036	15.04			-0.0041	13.18	-0.0044	17.14	-0.0033	18.44	-0.0033	17.79
diclofenac	296.024	3033			-0.0062	30.47	-0.0038	18.96			-0.0061	27.61							-0.0067	25.17
diethyl-phthalate	223.096	6781					-0.0045	26.69	-0.0043	23.15	-0.0043	26.56							-0.0027	26.12
dihydrocodeine	302.175	5284543	-0.0035	29.05	-0.0057	28.9	-0.0045	25.63	-0.0056	23.17	-0.0064	29.41	-0.0033	25.01	-0.0039	21.25	-0.0037	20.07	-0.0052	21.73	-0.0053	27.06
dimethyl-phthalate	195.065	N/A							-0.0034	19.06	-0.0033	17.93
di-n-butyl phthalate	279.159	3026	-0.004	41.37	-0.0023	41.38	-0.0042	34.66	-0.0042	34.65	-0.0028	34.65	-0.0028	34.65	-0.0033	34.56	-0.004	34.68	-0.0025	34.68	-0.0052	34.67
diphenhydramine	256.17	3100					-0.0039	34.3	-0.004	28.11	-0.0033	34.91			-0.0033	24.28	-0.0022	23.11	-0.0053	24.24
diphenylamine	170.096	11487	-0.0049	28.81			-0.0049	22.58	-0.0039	27.95	-0.0026	21.4	-0.004	17.7	-0.0036	23.43	-0.0041	27.96	-0.0024	23.52	-0.0028	23.05
diphenylguanidine	212.118	7594	-0.0043	36.85	-0.0031	40.52	-0.0033	39.02	-0.0047	35.28	-0.0029	37.08	-0.0035	37.02	-0.0045	36.08	-0.0036	37.06	-0.0023	35.44	-0.0038	37.06
ecgoninemethylester	200.128	104904					-0.0037	25.99	-0.0031	16.09
emtricitabine	248.05	60877			-0.0031	17.49	-0.0053	17.58											-0.0034	23.33
ephedrine	166.123	5032	-0.0032	36.41	-0.0029	30.83	-0.0032	30.71	-0.0033	30.75	-0.0028	33.37			-0.0036	32.01	-0.0032	35.13	-0.003	27.29	-0.0032	30.65
ephedrine-M:-H2O	148.112		-0.0032	48.68	-0.0037	47.27	-0.0028	46.52	-0.0028	42.88	-0.0036	27.29	-0.0031	36.23	-0.0028	51.69	-0.0033	43.78	-0.0025	41.34	-0.0034	46.56
eprosartan	425.153	5281037	-0.0032	8.77	-0.0073	27.38	-0.004	28.16	-0.0038	27.3	-0.0084	23.24	-0.0027	18.43	-0.0045	12.11	-0.0027	10.82	-0.0076	23.64	-0.0067	24.45
ethylecgonine	214.144	155580					-0.0035	14.32													-0.005	14.18
ferulic acid	195.065	445858	-0.0038	14.76	-0.0046	14.97	-0.004	17.47	-0.0047	13.9	-0.0026	18.56	-0.0037	12.26	-0.004	11.09	-0.0039	16.36	-0.0039	14.08	-0.0028	16
fexofenadine	502.295	3348			-0.0083	19.65	-0.0045	14.67			-0.0026	18.67	-0.0078	18.33					-0.0086	17.3
fluconazole	307.111	3365	-0.005	24.18	-0.0054	31.18	-0.0044	17.41	-0.0032	33.4	-0.0059	27.66	-0.004	26.64	-0.0033	38.1	-0.003	33.64	-0.0046	33.34	-0.0063	36.83
gabapentin	172.133	3446	-0.0033	38.78	-0.0033	37.54	-0.0034	35.21	-0.0041	37.25	-0.0023	34.91	-0.0031	35.61	-0.0034	35.87	-0.0039	37.55	-0.0046	37.12	-0.0027	37.51
heroin	370.165	5462328	-0.0026	14.59									-0.0031	11.68	-0.0041	11.46	-0.0041	27.67
histidine	156.077	773	-0.0038	17.76									-0.0041	19.3			-0.0035	14.5
hordenine	166.123	68313	-0.0036	19.08	-0.004	25.58					-0.0033	17.77	-0.0036	15.2	-0.004	13.78	-0.0031	24.05	-0.0024	20.81	-0.0033	21.46
hydroxy amitriptyline	294.185		-0.0067	13.91			-0.0051	16.66	-0.0059	10.13	-0.007	17.08			-0.0066	10.02
hydroxy diphenhydramine	272.165																		-0.0059	35.55
hydroxy metoprolol	284.186		-0.0036	29.32	-0.0055	41.19	-0.0048	38.22	-0.0043	29.86	-0.0032	23.28	-0.0044	35.77	-0.0046	19.76	-0.0042	33.58	-0.0023	21.13	-0.003	34.4
hydroxy mirtazapine	282.16				0.0041	10.76	-0.0032	11.88	-0.0044	12.35	-0.0063	10.79			-0.0045	13.3			-0.007	11.38
hydroxy quetiapine	400.169				-0.0081	18.07					-0.005	13
hydroxy trazodone	388.154		-0.0053	14.41	-0.0027	22.55	-0.0053	16.04	-0.0056	20.42	-0.0031	25.05	-0.0036	11.75	-0.0056	10.67	-0.0038	11.21	-0.0027	13.34	-0.007	15.69
hydroxy zolpidem	324.171								-0.0033	20.63			-0.0042	17.95
hypoxanthine	137.046	790	-0.0027	48.41	-0.0036	41.8	-0.0027	32.64	-0.0036	23.86	-0.0035	41.58	-0.0033	25.55	-0.0028	44.76	-0.0034	41.68	-0.0022	29.26	-0.0035	33.36
indoleacetamide	175.087	397									-0.0038	10.26
inosine	269.088	6021	-0.0037	21.08	-0.0033	23.88	-0.0041	14.56			-0.0026	31.91	-0.0036	18.1	-0.0034	22.04	-0.0029	15.82	-0.0042	38.25	-0.0024	27.3
ketamine	238.099	3821									-0.0056	23.41	-0.0039	34.5
kynurenine	209.092	846							-0.0041	14.49
lamotrigine	256.015	3878							-0.0034	10.23	-0.0065	15.92							-0.0055	17.37	-0.0061	18.98
levamisole	205.079	26879	-0.004	28.27	-0.0051	30.49	-0.0039	28	-0.0032	22.07	-0.0013	26.49	-0.0013	26.49	-0.0041	25.87	-0.0028	25	0.0002	18.73	-0.0045	25.55
levetiracetam	171.113	5284583	-0.0027	27.06	-0.0023	22.95	-0.003	24.35	-0.0045	23.28	-0.0032	24.33	-0.0039	24.36	-0.0034	22.93	-0.004	21.99	-0.0029	22.95	-0.0045	24.35
linoleic acid	281.248	5280450	-0.0033	31.75	-0.0057	37.73	-0.0034	34.91	-0.0038	36	-0.0064	35.32	-0.0064	35.32	-0.0033	30.39	-0.0045	35.48	-0.0027	36.05	-0.0055	37.19
metformin	130.109	4091	-0.0029	36.88	-0.0023	33.87	-0.0021	50.06	-0.0023	44.61	-0.0037	40.32	-0.0027	33.72	-0.0025	36.87	-0.0028	40.39	-0.0032	40.24	-0.003	36.63
metoprolol	268.191	4171	-0.0032	16.59	-0.0057	15.69	-0.0033	15.96	-0.0048	11.63	-0.0057	16.59	-0.0038	15.51	-0.004	16.88	-0.0039	16.78	-0.0054	14.89	-0.0052	15.61
metronidazole	172.072	4173									-0.0047	10.84
milnacipran	247.18	65833							-0.0035	12.15					-0.0047	14.07
minoxidil	210.135	4201	-0.0036	32.38	-0.0034	30.53	-0.0033	36.92	-0.0044	35.14	-0.005	42.37	-0.0044	43.74	-0.0038	40.05	-0.0033	43.63	-0.0049	42.03	-0.0059	38.08
mirtazapine	266.165	4205			-0.0058	27.75	-0.0036	19.57	-0.0027	24.63	-0.0069	21.92
morphine	286.144	5980	-0.0039	17.72	-0.0063	5.8	-0.0024	18.31	-0.0036	17.66	-0.0056	17.04	-0.0026	33.03	-0.0037	17.26	-0.0044	16.42	-0.0052	16.12	-0.002	15.24
morphine glucuronide	462.176	5484731	-0.0035	16.1			-0.0055	8.02											-0.003	13.25	-0.0077	23.04
moxifloxacin	402.182	152946							-0.0031	13.71
mycophenolic acid	321.133	4272	-0.0066	10.48	-0.0067	26.61	-0.0042	27.86			-0.0067	32.32	-0.0067	32.32	-0.0051	16.11	-0.0048	15.76	-0.0036	26.72
N,N-diethyl-3-methyl-benzamide	192.138	4284	-0.0043	52.33	-0.0021	52.53	-0.0035	51.88	-0.0038	39.52	-0.0032	45.09	-0.0032	45.09	-0.0029	45.23	-0.0039	45.17	-0.0042	44.83	-0.0025	44.55
N,N-dimethyl-1-decanamine oxide	202.216	62452					-0.0037	14.29			-0.0045	16.09	-0.0045	16.09			-0.004	12.04	-0.0056	14.61	-0.0047	18.68
N,O-didesmethyl venlafaxine	250.18	3451347	-0.003	9.32	-0.0051	9.69	-0.0034	9.77	-0.0046	7.56					-0.0037	10.17			-0.0053	8.28	-0.0051	7.85
N4-acetylsulfamethoxazole	296.07	65280					-0.0056	34.48			-0.0044	15.09			-0.0054	25.02
naproxen	231.102	1302	-0.0043	22.22	-0.0028	26.18	-0.0039	27.56	-0.0041	26.25	-0.0031	25.12	-0.0037	26.23	-0.0042	27.57	-0.004	25.04	-0.0024	26.19	-0.0024	26.26
N-demethyl venlafaxine	264.196		-0.0031	18.62	-0.0025	20.39	-0.0035	18.61	-0.004	23.23	-0.0055	19.06	-0.0036	16.37	-0.0041	21.51			-0.0048	20.13	-0.0055	21.95
N-didesmethyl venlafaxine	250.18		-0.0044	11.64			-0.0034	11.5	-0.0038	10.47					-0.0037	11.01			-0.0038	11.35	-0.0031	12.42
nicotinamide	123.055	936									-0.0039	31.03
nicotine	163.123	89594	-0.0027	41.08	-0.0029	45.86	-0.0031	39.41	-0.0033	38.08	-0.0023	45.91	-0.0027	40.86	-0.0032	39.75	-0.003	39.45	-0.0024	40.94	-0.0025	44.63
N-lauroylsarcosine	272.222	7348			-0.0058	22.3	-0.0034	25.49	-0.004	16.01	-0.0062	17.6	-0.0053	24.89	-0.0039	13.38	-0.0036	12.36	-0.0056	21.82	-0.0068	29.69
norhydrocodone	286.144	13001738									-0.0032	17.46	-0.0044	16.69							-0.0026	17.34
normorphine	272.128	430245	-0.0027	19.48	-0.0025	19.66	-0.0043	23.85	-0.0031	22.05	-0.0033	21.1	-0.0055	15.93	-0.0041	16.05	-0.0053	16.42	-0.0061	17.76	-0.0024	23.21
O-desmethyl venlafaxine	264.196		-0.0041	21.6	-0.0021	22.97	-0.0042	25.1	-0.0038	10.73	-0.0029	22.2	-0.0043	23.9	-0.0045	16.31	-0.0045	25.78	-0.0029	22.3	-0.0024	24.04
ofloxacin	362.151	149096	-0.0044	20.34	-0.0075	18.7	-0.0035	19.68	-0.0029	19.47	-0.0082	18.78	-0.004	17.97	-0.0032	18.44	-0.0038	11.04	-0.0049	21.04	-0.0067	18.01
olmesartan	447.214	158781	-0.0017	22.81	-0.0092	36.07	-0.0038	36.33	-0.0057	21.66	-0.0082	29.94	-0.005	22.69	-0.0061	32.76	-0.0033	27.83			-0.0072	11.76
oxazepam	287.058	4616	-0.0039	25.08	-0.002	32.44	-0.0046	33.51	-0.0052	30.02	-0.0027	30.6	-0.0039	33.26	-0.0034	27.76	-0.0041	27.18	-0.0068	26.16	-0.005	29.94
oxcarbazepine	253.097	34312					-0.0031	29.66	-0.0033	29.67	-0.0029	29.66			-0.0037	25.51	-0.0032	27.43	-0.0045	32.27	-0.0022	27.41
oxyquinoline	146.06	1923	-0.0033	21.73	-0.0039	27.69	-0.0031	27.21	-0.0027	26.18	-0.003	24.73	-0.0032	26.8	-0.003	30.32	-0.0032	28.07	-0.0025	36.24	-0.003	25.62
phenacetin	180.102	4754							-0.0042	30.82
pheniramine	241.17	4761	-0.0044	19.26	-0.0056	28.04	-0.0044	40.25	-0.0041	33.06	-0.0064	26.08			-0.0041	24.38	-0.0047	30.33
phenylalanine	166.086	994	-0.0032	38.08	-0.0033	42.05	-0.0033	41.49	-0.0032	38.27	-0.0024	41.65	-0.0035	45.11	-0.0033	32.93	-0.0034	33.93	-0.0028	32.88	-0.0031	41.68
phthalimide	148.039	6809	-0.0024	28.09	-0.0024	28.95	-0.0027	27.04	-0.0033	25.44	-0.004	25.41	-0.0034	27.21	-0.0032	27.03	-0.0034	24.97	-0.004	27.03	-0.0033	27.07
piperine	286.144	638024	-0.0048	31.34	-0.0058	32.51	-0.0028	33.16	-0.0034	33.61	-0.0063	33.12	-0.0029	33.2	-0.0028	30.84	-0.0029	35.19	-0.0056	33.18	-0.0052	33.04
pregabalin	160.133	5486971	-0.0031	14.69	-0.0039	16.7	-0.0033	16.52			-0.0048	13.61			-0.0035	18.75			-0.0034	22.08	-0.0047	17.31
propyphenazone	231.149	3778			-0.0027	21.2	-0.0037	22.98
pyrantel	207.095	708857							-0.0025	15.96
pyridoxine	170.081	1054									-0.0046	20.76	-0.0032	23.97							-0.0045	23.3
quetiapine	384.174	5002	-0.0043	32.39	-0.0065	26.18	-0.0051	44.9	-0.0054	45.1	-0.0065	40.7	-0.0031	41.59	-0.0045	30.29	-0.004	32.45	-0.002	41.62	-0.0038	51.12
quinidine	325.191	5953			-0.006	19.91	-0.0036	22.6			-0.008	14.51							-0.0063	18.8	-0.0064	22.28
ranitidine	315.149	3001055	-0.0035	25.78	-0.006	28.06	-0.0043	23.38	-0.0047	23.77	-0.0061	24.68	-0.0038	18.03	-0.0039	16.62	-0.0029	20.43	-0.0058	16.8	-0.0063	16.83
ritalinic acid	220.133	86863									-0.0048	10.17	-0.0048	10.17					-0.0062	10.19	-0.0048	10.97
rosuvastatin	482.176	446157					-0.0086	10.8
salicylic acid	139.039	338	-0.0033	15.19	-0.0038	14.15	-0.0023	13.44	-0.003	15.61	-0.0031	17.03	-0.0031	17.03	-0.0031	15.88	-0.0036	13.33	-0.0037	16.87	-0.0035	15.92
serotonin	177.102	5202	-0.0035	21.97	-0.0047	22.09			-0.0031	13.48	-0.0048	21.71			-0.004	15.08	-0.0032	19.52
sitagliptin	408.125	4369359	-0.0035	15.67	-0.0019	30.47	-0.0048	31.13	-0.0037	30.45	-0.0027	31.42	-0.0047	27.44	-0.0046	31.4	-0.0064	27.72	-0.003	27.59	-0.0034	32.7
sotalol	273.127	5253			-0.0066	15.01					-0.0061	17.03							-0.0035	12.35
sulpiride	342.148	5355	-0.0026	5.06			-0.005	9.05	-0.0029	12.93	-0.0063	11.29									-0.0058	13.85
telmisartan	515.244	65999							-0.0054	10.91
terbutryne	242.143	13450															-0.004	32.93	-0.0054	40.63
tetrabutylammonium	242.284	16028	-0.0047	16.84
theobromine	181.072	5429					-0.0032	18.82			-0.0043	11.18					-0.0041	10.87	-0.0048	10.76
theophyline	181.072	2153	-0.0031	14.35	-0.0021	17.93	-0.0027	15.14	-0.0032	17.88	-0.0027	17.98	-0.0027	17.98	-0.0034	15.93	-0.0037	17.94	-0.002	17.92	-0.0037	16.54
thiamine	265.112	1130	-0.003	33.58	-0.0061	29.39	-0.0031	14.5	-0.0024	50	-0.006	19.67	-0.0042	46.86	-0.003	39.18	-0.0036	21.97	-0.0056	33.6	-0.0056	37.66
thymine	127.05	1135	-0.0027	47.2	-0.0039	47.16	-0.003	42.6	-0.0036	47.17	-0.0031	52.9	-0.0024	42.7	-0.0021	32.52	-0.0029	42.5	-0.0035	48.18	-0.0032	40.1
tiapride	329.153	5467	-0.0033	11.55			-0.0034	10.67	-0.0038	11.94	-0.003	10.47			-0.004	13.72					-0.0055	11.07
tranylcypromine	134.096	5530			-0.0032	12.94	-0.0029	15.14									-0.0026	10.9	-0.002	10.27
trimethoprim	291.145	5578	-0.004	23.72	-0.0053	24.93	-0.0034	26.19	-0.0034	27.81	-0.0029	25.43	-0.0035	25.7	-0.0039	28.37	-0.0041	26.23	-0.0052	26.49	-0.0062	26.81
trospium	392.222	5596			-0.0074	12.21	-0.004	11.43	-0.0033	12.02									-0.0068	14.11
tryptamine	161.107	1150	-0.0034	28.46	-0.004	28.38	-0.0038	24.78	-0.0039	28.71	-0.0049	27.61	-0.0034	27.82	-0.0035	29.08	-0.0028	28.03	-0.0058	14.15	-0.0048	27.06
tryptophan	205.097	1148	-0.0026	39.35	-0.0019	37.85	-0.0028	36.43	-0.0041	38.16	-0.0023	39.12	-0.0033	39.69	-0.0033	39.28	-0.0037	37.77	-0.0028	36.65	-0.0026	39.22
tyramine	138.091	5610	-0.0027	24.04	-0.0025	30.26	-0.0029	21.91	-0.003	23.99	-0.0039	26.48	-0.0024	21.26	-0.0025	26.51	-0.0019	15.19	-0.004	23.47	-0.0036	24.99
tyrosine	182.081	1153			-0.0047	12.96			-0.0024	10.53	-0.0055	13.24	-0.0032	15.29	-0.0037	14.09	-0.004	17.71			-0.0029	13.51
valsartan	436.234	60846	-0.006	16.67	-0.0079	33.71	-0.0043	35.5	-0.0043	38.15	-0.0099	34.91	-0.0049	34.98	-0.0038	20.65	-0.0043	25.99	-0.0098	24.62
venlafaxine	278.212	5656	-0.0043	13.2	-0.0022	13.28	-0.0035	12.84	-0.0047	12.59	-0.0019	12.29	-0.0042	13.6	-0.0036	12.7	-0.0044	13.64	-0.0057	11.58	-0.0062	12.42
vildagliptin	304.202	6918537	-0.0042	20.47	-0.0061	24.35	-0.0052	20.59	-0.0036	11.46	-0.0071	23.55	-0.0038	17.42			-0.0032	15.9	-0.0063	22.85	-0.0059	19.26
zolpidem carboxylic acid	338.15		-0.0045	41.36	-0.0059	43.6	-0.0035	44.91	-0.0033	43.14	-0.0027	54.53	-0.0046	46.5	-0.0045	54.33	-0.0025	38	-0.0068	43.8	-0.0058	41.92

## Sheet: Table S3
Table S3: Overview of compounds identified by non-targeted LC-MS/MS in nine wastewater samples collected at the effluent of Swiss WWTPs
Compound	Precursor ion m/z	PubChem CID	18		19		20		21		22		23		28		29		30
			m/z error	amp	m/z error	amp	m/z error	amp	m/z error	amp	m/z error	amp	m/z error	amp	m/z error	amp	m/z error	amp	m/z error	amp
10,11-trans-dihydroxy-10,11-dihydrocarbamazepine	271.108	114725	0.0003	8.2	0.0003	6.47	0.0003	6.12	0.0003	8.15	0.0003	7.33	0.0003	1.98	0.0003	6.74	0.0003	6.72	0.0003	7.32
1H-benzotriazole	120.056	7220	-0.0001	10.67	0	13.35	0.0004	11.32	0.0004	11.45	0.0004	10.91			0	22.06	0.0004	11.98
2,6-dichlorobenzamide	189.982	16183	-0.0001	4.61					-0.0001	5.58	-0.0001	5.66					-0.0001	3.87
2-aminobenzimidazole	134.071	13624			-0.0003	3.71					-0.0003	1.05
2-hydroxybenzothiazole	152.017	13625									0.0005	1.94
2-isopropyl-4-methyl-6-hydroxypyrimidine	153.102	17777			-0.0001	6.43
4-acetamidoantipyrine	246.124	65743	0.0002	31.1	0.0001	32.22	0.0002	27.53	0.0003	19.57	0	29.26	-0.0002	13.41	0.0003	11.61	0	12.68	-0.0001	30.18
4-formylaminoantipyrine	246.124	72666	-0.0001	19.72	0	15.89	0.0002	24.5	0.0003	12.96	0	19.66	-0.0002	10			0	5.13	-0.0003	13.96
4-isopropylaniline	136.112	7464			-0.0001	3.56	-0.0001	3.02
5-methyl-1H-benzotriazole	134.071	8705	0	18.88	-0.0003	10.94	-0.0001	10.77	-0.0001	8.26	0.0001	12.77	0	9.71	0	39.77	-0.0003	12.59	-0.0001	12.18
amphetamine	136.112	3007			-0.0001	1.16			-0.0001	1.24			-0.0001	1.02	-0.0003	20.8			-0.0001	1.04
antipyrine	189.102	2206	-0.0003	5.5	-0.0003	7.68	-0.0003	7.59	-0.0003	7.14	0.0003	9.61	-0.0003	1.89			-0.0003	4.13	-0.0003	1.86
atenolol	267.17	2249	-0.0004	19.94	0	30.22	0	34.14	0.0001	11.74	0.0006	32.71	0.0005	25.88	0	15.9	-0.0004	18.01	0.0003	16.12
atenolol acid	268.154	62936	-0.0001	14.9	0.0001	15.14	0.0001	34.06	0.0003	24.48	-0.0002	31.32	-0.0002	12.47	0.0002	35.17	0.0001	28.03	-0.0001	37.47
atrazine	216.101	2256	-0.0001	2.22	-0.0001	2.89
atrazine-desethyl	188.07	22563			0.0003	5.83
benzophenone-3	229.086	4632	0.0001	7.68			0.0001	6.91	0.0001	4.91			0.0001	5.76			0.0001	6.49	0.0001	5.41
benzothiazole	136.022	7222	-0.0001	1.14	0.0005	4.93	-0.0002	2.32	0.0005	6.56			0.0005	3.55	0.0001	6.66	0.0001	6.11	0	5.72
bezafibrate	362.115	39042	-0.0004	2.81	-0.0004	1.36	-0.0004	1.81			-0.0004	1.62	-0.0004	2.64	-0.0004	5.32	-0.0004	2.5	-0.0004	1.2
caffeine	195.088	2519	-0.0002	3.16	0.0003	5.71	0.0003	2.19	0.0003	4.4	-0.0005	4.11	0.0003	5.6	0	29.33	-0.0001	22.62	-0.0008	3.95
carbamazepine	237.102	2554	0.0002	33.93	0.0002	33.97	-0.0003	36.82	-0.0003	36.84	-0.0003	36.84	-0.0003	33.96	0.0005	33.95	0	36.84	0.0004	33.95
carbamazepine-10,11-epoxide	253.097	2555	-0.0002	52.46	-0.0002	45.22	-0.0002	39.76	-0.0002	45.3	-0.0002	52.42	-0.0002	45.29	-0.0002	35.4	-0.0002	35.49	-0.0002	45.33
carbendazim	192.077	25429											-0.0002	46.71					0.0002	2.59
cetirizine	389.163	2678			0.0004	1.11	0.0004	1.64			0.0004	2.56			0.0004	1	0.0004	2.06
chloridazone-methyl-desphenyl	160.027	594330															-0.0002	5.11
clarithromycin	748.484	84029	-0.0002	4.04	-0.0004	1.97	-0.0018	5.9	-0.0003	2.51	0.0007	6.07	0	2.03	0.0002	4.62	0	4.25	0.0001	3.78
codeine	300.159	5284371					-0.0012	1							0	1.46	-0.0008	1.45
desalkyl verapamil	291.207		0.0003	8.31	0.0003	9.86	0.0003	5.11	0.0003	6.5	0.0003	10.67	0.0003	9.37	0.0003	5.55	0.0003	10.16	0.0003	4.08
diazinon	305.108	3017	-0.0004	1.09	-0.0004	1.17	-0.0003	2.5											-0.0003	2.4
diclofenac	296.024	3033	0	47.36	0	47.29	0	47.43	0	47.29	0	47.37	0	47.37	0	47.47	0	47.36	0	47.39
di-n-butyl phthalate	279.159	3026													0.0002	18.13
erythromycin	734.468	12560											0.0015	3.26
fluconazole	307.111	3365	-0.0006	3.37	-0.0006	5.61	-0.001	3.38			0	4.65	-0.0008	2.03	-0.0004	3.33			-0.0004	3.77
gabapentin	172.133	3446	-0.0005	9.75	-0.0003	4.06			-0.0003	3.72	0	12.1	-0.0003	4.07	-0.0002	5.78			-0.0003	9.47
galaxolidone	273.185	69131857	0.0003	25.39	0.0003	25.36	0.0005	14.82	0.0003	11.14	0.0006	5.94	0.0004	25.09			0.0003	25.71	0.0006	2.58
indomethacin	358.084	3715	-0.0001	6.17	-0.0001	6.47	-0.0001	5.07			-0.0001	3.95	-0.0001	3.56					-0.0001	1.3
iomeprol	777.861	3731													-0.0008	4.35
iopromide	791.877	3736	-0.0025	1.34	-0.0001	1.14	-0.0024	3.5			-0.0006	1.62	0	2.39	-0.0008	4.35
ketoprofen	255.102	3825	0.0004	5.67	0.0004	3.52	-0.0003	6.91	0.0004	4.56	0.0006	5.79	0.0002	4.9	0.0004	5.23	0.0003	4.99	0.0004	4.15
lamotrigine	256.015	3878	-0.0002	1.37	-0.0002	16.86	-0.0002	21.14	-0.0002	10.16	-0.0002	12.13	-0.0002	8.92	-0.0002	5.89	-0.0002	16.31	-0.0002	16.96
levetiracetam	171.113	5284583	-0.0004	1.25	0.0002	2.16	0.0001	1.88	-0.0001	1.19	0.0001	2.43	0.0001	14.4	-0.0002	1.69	-0.0002	5.58
lidocaine	235.18	3676	-0.0005	2.08	0.0002	1.78	-0.0003	1.79	-0.0005	2.64	0	2.54	0.0001	2.56	-0.0005	2.21	-0.0005	2.55	-0.0005	3.35
mefenamic acid	242.118	4044	0.0004	4.04	0	3.66	0.0003	3.46	0.0003	7.89	0.0006	37.57	0.0003	37.47	0.0002	37.41	0.0003	37.33	0.0003	3.37
metalaxyl	280.154	42586													-0.0004	1.99
metformin	130.109	4091	0.0002	2.49			-0.0006	9.48	0.0002	1.72	-0.0003	5.29	0.0002	2.71	-0.0006	-0.0006	-0.0006	15.03	-0.0005	8.75
metoclopramide	300.147	4168	-0.0004	2.56	-0.0004	2.69	-0.0004	3.75	-0.0004	1.82	-0.0004	25.54	-0.0004	2.81					-0.0004	3.24
metolachlor	284.141	4169															-0.0002	2
metoprolol	268.191	4171	0.0002	9.01	0.0002	11.77	0.0002	10.18	0.0002	11.71	0.0002	13.28	0.0002	6.74	0.0002	7.1	0.0002	10.22	0.0002	9.45
metronidazole	172.072	4173			0.0003	9.08	0.0003	5.82	0.0003	1.42	0.0003	2.1	0.0003	2.67			0.0003	2.94
moclobemide	269.105	4235	-0.0002	5.72	-0.0002	5.49	-0.0002	4.87			-0.0002	5.07	-0.0002	5.45					-0.0002	4.68
morphine	286.144	5980					-0.0004	2.73	-0.0003	1.13
N,N-diethyl-3-methyl-benzamide	192.138	4284	-0.0003	16.86	-0.0003	39.34	-0.0003	50.96	0	54.4	-0.0003	7.46	0.0003	9.37	-0.0003	6	-0.0003	50.94	0.0001	32.86
N,O-didesmethylvenlafaxine	250.18	3451347	0.0002	6.35	0.0001	6.48	0.0002	3.98	0.0003	2.47	0.0006	7.45	-0.0002	2.43	-0.0002	6.32
N4-acetylsulfamethoxazole	296.07	65280	0	11.25	0	3.64			0	1.99
naproxen	231.102	1302	0.0004	3.64			0.0004	4.19	0.0004	6.18	0.0004	5.46	0.0004	5.16	0.0004	5.48	0.0004	9.92
nicotine	163.123	89594	0	5.46	0	9.21	0	21.39	0	8.41	-0.0002	16.06	-0.0004	6.4	-0.0005	27.47	0	21.38	0	5.56
O-desmethyltramadol	250.18	130829	-0.0005	2.14	-0.0001	2.56
O-desmethylvenlafaxine	264.196	125017	0.0001	14.55	0.0003	10.5	0.0001	7.85	0.0003	9.2	0.0004	8.56	0.0004	9.52	0.0003	9.72	0.0001	8.42	0.0001	9.04
oxazepam	287.058	4616	-0.0002	4.6	-0.0002	3.63	-0.0002	16.83	-0.0002	3.09	-0.0002	4.14	-0.0002	5.73	-0.0002	7.89	-0.0002	5.15	-0.0002	3.84
paracetamol	152.071	1983													0.0003	20.66
piperine	286.144	638024					0.0003	1.52	0.0003	2.47					0.0003	22.28	0.0003	22.29
primidone	219.113	4909													0.0001	8.27
propazine	230.117	4937			0.0003	4.46
propazine-2-hydroxy	212.151	23842			0.0004	4.91
propranolol	260.165	4946	-0.0006	1.94	-0.0006	2.89	-0.0005	1.95			0.0007	3.39	-0.0006	1.48	-0.0006	5.07
ranitidine	315.149	3001055	-0.0007	8.3	-0.0001	10.4	-0.0001	24.71	0.0001	6.66	0.0005	10.81	0.0004	18.69	-0.0004	6.4	-0.0004	3.19	0.0004	9.95
ranitidine N-oxide	331.144	3033888	-0.0009	2.29					0.0001	2.19			0.0003	3.59
ranitidine-S-oxide	331.144	3033889											-0.0008	1.21
ritonavir	721.32	60954					-0.001	1.06
roxithromycin	837.532	6915744											0	5.7
sotalol	273.127	5253	-0.0008	6.97	-0.0002	7.32	-0.0001	8.16	-0.0001	5.76	0.0002	20.63	0.0001	20.68	-0.0004	8.78	0	9.34	-0.0004	14.28
sulfamethoxazole	254.059	5329	-0.0004	6.73	0.0003	9.02	-0.0004	9.64	-0.0004	4.54	-0.0004	4.25	0.0004	7.01	-0.0004	1.6	0.0004	6.2	0.0002	7.09
sulfapyridine	250.065	5336	0.0005	9.93	0.0005	6.46	0.0005	6.21	0.0005	7.99	0.0005	9.04	0.0005	4.91			0.0005	2.74	0.0002	4.87
terbutryne	242.143	13450	-0.0004	3.21	-0.0004	2.2			0.0001	1.61			-0.0004	2.89					-0.0004	2.66
terbutylazine-2-hydroxy	212.151	5151089									0.0004	5.12			0.0004	4.12	0.0004	4.53	0.0004	5.71
terbutylazine-desethyl	202.085	108201			-0.0004	3.92
tri(butoxyethyl)phosphate	399.251	6540															0.0003	6.17
tributylphosphate	267.172	31357	0.0003	15.3	0.0001	15.3	0.0001	7.61	0.0003	15.3	0.0006	15.3	0.0005	15.3	0.0004	15.3	0.0003	15.3	0.0003	15.3
trimethoprim	291.145	5578	-0.0006	9.26	0.0001	6.02	-0.0002	9.25	-0.0001	7.22	-0.0004	10.42	-0.0007	7.06	0.0002	4.95	-0.0002	6.47	-0.0004	6.46
valsartan	436.234	60846					0.0001	9.81	-0.0003	4.87	0.0007	8.5	0.0007	6.87	-0.0004	4.89	0.0002	10.77
valsartan acid	267.088	19388302	0.0003	2.8	0.0003	17.26			0.0003	1.12	0.0003	3.68	0.0003	1.26					0.0003	9.23
venlafaxine	278.212	5656	0.0005	11.55	0.0001	11.86	0.0005	10.6	0.0004	6.77	0.0007	5	0.0005	9.69	0.0004	10.09	0.0004	5.51	0.0003	8.96

## Sheet: Table S4
Table S4: Additional chemical information for all compounds mentioned in Table S1 to S3. Map to the original tables with column "WRTMSD Name"
WRTMSD Name	Identification Level	Preferred Name	IUPAC Name	CAS_RN	DTXSID	SMILES	Standard InChI	InChIKey	Molecular Formula	Monoisotopic Mass
1-(3-chlorophenyl)piperazine	Level 1 - Reference Standard	1-(3-Chlorophenyl)piperazine	1-(3-Chlorophenyl)piperazine	6640-24-0	DTXSID9045138	ClC1=CC(=CC=C1)N1CCNCC1	InChI=1S/C10H13ClN2/c11-9-2-1-3-10(8-9)13-6-4-12-5-7-13/h1-3,8,12H,4-7H2	VHFVKMTVMIZMIK-UHFFFAOYSA-N	C10H13ClN2	196.077
11-hydroxy-delta(9)-tetrahydrocannabinol	Level 1 - Reference Standard	11-Hydroxytetrahydrocannabinol	(6aR,10aR)-9-(Hydroxymethyl)-6,6-dimethyl-3-pentyl-6a,7,8,10a-tetrahydro-6H-dibenzo[b,d]pyran-1-ol	36557-05-8	DTXSID50190061	CCCCCC1=CC(O)=C2[C@@H]3C=C(CO)CC[C@H]3C(C)(C)OC2=C1	InChI=1S/C21H30O3/c1-4-5-6-7-14-11-18(23)20-16-10-15(13-22)8-9-17(16)21(2,3)24-19(20)12-14/h10-12,16-17,22-23H,4-9,13H2,1-3H3/t16-,17-/m1/s1	YCBKSSAWEUDACY-IAGOWNOFSA-N	C21H30O3	330.219
11-nor-delta(9)-tetrahydrocannabinol-9-carboxylic_acid	Level 1 - Reference Standard	6H-Dibenzo[b,d]pyran-9-carboxylic acid,6a,7,8,10a-tetrahydro-1-hydroxy-6,6-dimethyl-3-pentyl-	1-Hydroxy-6,6-dimethyl-3-pentyl-6a,7,8,10a-tetrahydro-6H-dibenzo[b,d]pyran-9-carboxylic acid	64280-14-4	DTXSID8074788	CCCCCC1=CC(O)=C2C3C=C(CCC3C(C)(C)OC2=C1)C(O)=O	InChI=1S/C21H28O4/c1-4-5-6-7-13-10-17(22)19-15-12-14(20(23)24)8-9-16(15)21(2,3)25-18(19)11-13/h10-12,15-16,22H,4-9H2,1-3H3,(H,23,24)	YOVRGSHRZRJTLZ-UHFFFAOYSA-N	C21H28O4	344.199
25-hydroxyvitamine D3	Level 1 - Reference Standard	Calcifediol	(3S,5Z,7E)-9,10-Secocholesta-5,7,10-triene-3,25-diol	19356-17-3	DTXSID0022721	[H][C@@]1(CC[C@@]2([H])\C(CCC[C@]12C)=C\C=C1\C[C@@H](O)CCC1=C)[C@H](C)CCCC(C)(C)O	InChI=1S/C27H44O2/c1-19-10-13-23(28)18-22(19)12-11-21-9-7-17-27(5)24(14-15-25(21)27)20(2)8-6-16-26(3,4)29/h11-12,20,23-25,28-29H,1,6-10,13-18H2,2-5H3/b21-11+,22-12-/t20-,23+,24-,25+,27-/m1/s1	JWUBBDSIWDLEOM-DTOXIADCSA-N	C27H44O2	400.334
2-ethylidene-1,5-dimethyl-3,3-diphenylpyrrolidine	Level 1 - Reference Standard	2-Ethylidene-1,5-dimethyl-3,3-diphenylpyrrolidine	2-Ethylidene-1,5-dimethyl-3,3-diphenylpyrrolidine	30223-73-5	DTXSID10880951	CC=C1N(C)C(C)CC1(C1=CC=CC=C1)C1=CC=CC=C1	InChI=1S/C20H23N/c1-4-19-20(15-16(2)21(19)3,17-11-7-5-8-12-17)18-13-9-6-10-14-18/h4-14,16H,15H2,1-3H3	AJRJPORIQGYFMT-UHFFFAOYSA-N	C20H23N	277.183
2-hydroxybenzothiazole	Level 1 - Reference Standard	Benzothiazolone	1,3-Benzothiazol-2-ol	934-34-9	DTXSID6061315	OC1=NC2=CC=CC=C2S1	InChI=1S/C7H5NOS/c9-7-8-5-3-1-2-4-6(5)10-7/h1-4H,(H,8,9)	YEDUAINPPJYDJZ-UHFFFAOYSA-N	C7H5NOS	151.009
2-mercaptobenzothiazole	Level 1 - Reference Standard	2-Mercaptobenzothiazole	1,3-Benzothiazole-2-thiol	149-30-4	DTXSID1020807	SC1=NC2=C(S1)C=CC=C2	InChI=1S/C7H5NS2/c9-7-8-5-3-1-2-4-6(5)10-7/h1-4H,(H,8,9)	YXIWHUQXZSMYRE-UHFFFAOYSA-N	C7H5NS2	166.986
2-phenyl-1H-benzo[d]imidazole-6-sulfonic_acid	Level 1 - Reference Standard	Ensulizole	2-Phenyl-1H-benzimidazole-5-sulfonic acid	27503-81-7	DTXSID3038852	OS(=O)(=O)C1=CC2=C(NC(=N2)C2=CC=CC=C2)C=C1	InChI=1S/C13H10N2O3S/c16-19(17,18)10-6-7-11-12(8-10)15-13(14-11)9-4-2-1-3-5-9/h1-8H,(H,14,15)(H,16,17,18)	UVCJGUGAGLDPAA-UHFFFAOYSA-N	C13H10N2O3S	274.041
4-acetamidoantipyrine	Level 1 - Reference Standard	N-Acetylaminoantipyrine	N-(1,5-Dimethyl-3-oxo-2-phenyl-2,3-dihydro-1H-pyrazol-4-yl)acetamide	83-15-8	DTXSID40232106	CN1N(C(=O)C(NC(C)=O)=C1C)C1=CC=CC=C1	InChI=1S/C13H15N3O2/c1-9-12(14-10(2)17)13(18)16(15(9)3)11-7-5-4-6-8-11/h4-8H,1-3H3,(H,14,17)	OIAGWXKSCXPNNZ-UHFFFAOYSA-N	C13H15N3O2	245.116
4-formylaminoantipyrine	Level 1 - Reference Standard	4-Formylaminoantipyrine	N-(1,5-Dimethyl-3-oxo-2-phenyl-2,3-dihydro-1H-pyrazol-4-yl)formamide	1672-58-8	DTXSID10168241	CN1N(C(=O)C(NC=O)=C1C)C1=CC=CC=C1	InChI=1S/C12H13N3O2/c1-9-11(13-8-16)12(17)15(14(9)2)10-6-4-3-5-7-10/h3-8H,1-2H3,(H,13,16)	WSJBSKRPKADYRQ-UHFFFAOYSA-N	C12H13N3O2	231.101
6-o-monoacetylmorphine	Level 1 - Reference Standard	6-O-Monoacetylmorphine	(5alpha,6alpha)-3-Hydroxy-17-methyl-7,8-didehydro-4,5-epoxymorphinan-6-yl acetate	2784-73-8	DTXSID60182154	CN1CC[C@]23[C@H]4OC5=C(O)C=CC(C[C@@H]1[C@@H]2C=C[C@@H]4OC(C)=O)=C35	InChI=1S/C19H21NO4/c1-10(21)23-15-6-4-12-13-9-11-3-5-14(22)17-16(11)19(12,18(15)24-17)7-8-20(13)2/h3-6,12-13,15,18,22H,7-9H2,1-2H3/t12-,13+,15-,18-,19-/m0/s1	JJGYGPZNTOPXGV-SSTWWWIQSA-N	C19H21NO4	327.147
7-aminoclonazepam	Level 1 - Reference Standard	7-Aminoclonazepam	7-Amino-5-(2-chlorophenyl)-1,3-dihydro-2H-1,4-benzodiazepin-2-one	4959-17-5	DTXSID90197913	NC1=CC2=C(NC(=O)CN=C2C2=CC=CC=C2Cl)C=C1	InChI=1S/C15H12ClN3O/c16-12-4-2-1-3-10(12)15-11-7-9(17)5-6-13(11)19-14(20)8-18-15/h1-7H,8,17H2,(H,19,20)	HEFRPWRJTGLSSV-UHFFFAOYSA-N	C15H12ClN3O	285.067
7-aminoflunitrazepam	Level 1 - Reference Standard	7-Aminoflunitrazepam	7-Amino-5-(2-fluorophenyl)-1-methyl-1,3-dihydro-2H-1,4-benzodiazepin-2-one	34084-50-9	DTXSID40187682	CN1C2=C(C=C(N)C=C2)C(=NCC1=O)C1=CC=CC=C1F	InChI=1S/C16H14FN3O/c1-20-14-7-6-10(18)8-12(14)16(19-9-15(20)21)11-4-2-3-5-13(11)17/h2-8H,9,18H2,1H3	LTCDLGUFORGHGY-UHFFFAOYSA-N	C16H14FN3O	283.112
8-hydroxy mirtazapine	Level 1 - Reference Standard	8-Hydroxy Mirtazapine	2-Methyl-1,2,3,4,10,14b-hexahydropyrazino[2,1-a]pyrido[2,3-c][2]benzazepin-8-ol	102335-57-9	DTXSID60467650	CN1CCN2C(C1)C1=CC=CC=C1CC1=C2N=CC(O)=C1	InChI=1S/C17H19N3O/c1-19-6-7-20-16(11-19)15-5-3-2-4-12(15)8-13-9-14(21)10-18-17(13)20/h2-5,9-10,16,21H,6-8,11H2,1H3	DAWYIZBOUQIVNX-UHFFFAOYSA-N	C17H19N3O	281.153
acetaminophen	Level 1 - Reference Standard	Acetaminophen	N-(4-Hydroxyphenyl)acetamide	103-90-2	DTXSID2020006	CC(=O)NC1=CC=C(O)C=C1	InChI=1S/C8H9NO2/c1-6(10)9-7-2-4-8(11)5-3-7/h2-5,11H,1H3,(H,9,10)	RZVAJINKPMORJF-UHFFFAOYSA-N	C8H9NO2	151.063
adenosine	Level 1 - Reference Standard	Adenosine	Adenosine	58-61-7	DTXSID1022558	NC1=NC=NC2=C1N=CN2[C@@H]1O[C@H](CO)[C@@H](O)[C@H]1O	InChI=1S/C10H13N5O4/c11-8-5-9(13-2-12-8)15(3-14-5)10-7(18)6(17)4(1-16)19-10/h2-4,6-7,10,16-18H,1H2,(H2,11,12,13)/t4-,6-,7-,10-/m1/s1	OIRDTQYFTABQOQ-KQYNXXCUSA-N	C10H13N5O4	267.097
alpha-hydroxyalprazolam	Level 1 - Reference Standard	alpha-Hydroxyalprazolam	(8-Chloro-6-phenyl-4H-[1,2,4]triazolo[4,3-a][1,4]benzodiazepin-1-yl)methanol	37115-43-8	DTXSID60190613	OCC1=NN=C2CN=C(C3=CC=CC=C3)C3=C(C=CC(Cl)=C3)N12	InChI=1S/C17H13ClN4O/c18-12-6-7-14-13(8-12)17(11-4-2-1-3-5-11)19-9-15-20-21-16(10-23)22(14)15/h1-8,23H,9-10H2	ZURUZYHEEMDQBU-UHFFFAOYSA-N	C17H13ClN4O	324.078
alprazolam	Level 1 - Reference Standard	Alprazolam	8-Chloro-1-methyl-6-phenyl-4H-[1,2,4]triazolo[4,3-a][1,4]benzodiazepine	28981-97-7	DTXSID4022577	CC1=NN=C2CN=C(C3=CC=CC=C3)C3=CC(Cl)=CC=C3N12	InChI=1S/C17H13ClN4/c1-11-20-21-16-10-19-17(12-5-3-2-4-6-12)14-9-13(18)7-8-15(14)22(11)16/h2-9H,10H2,1H3	VREFGVBLTWBCJP-UHFFFAOYSA-N	C17H13ClN4	308.083
ampyrone	Level 1 - Reference Standard	Ampyrone	4-Amino-1,5-dimethyl-2-phenyl-1,2-dihydro-3H-pyrazol-3-one	83-07-8	DTXSID8048860	CN1N(C(=O)C(N)=C1C)C1=CC=CC=C1	InChI=1S/C11H13N3O/c1-8-10(12)11(15)14(13(8)2)9-6-4-3-5-7-9/h3-7H,12H2,1-2H3	RLFWWDJHLFCNIJ-UHFFFAOYSA-N	C11H13N3O	203.106
anhydroecgonine	Level 1 - Reference Standard	Ecgonidine	(1R,5S)-8-Methyl-8-azabicyclo[3.2.1]oct-2-ene-2-carboxylic acid	484-93-5	DTXSID60897574	CN1[C@H]2CC[C@@H]1C(=CC2)C(O)=O	InChI=1S/C9H13NO2/c1-10-6-2-4-7(9(11)12)8(10)5-3-6/h4,6,8H,2-3,5H2,1H3,(H,11,12)/t6-,8-/m1/s1	HZGRVVUQEIBCMS-HTRCEHHLSA-N	C9H13NO2	167.095
anhydroecgoninemethyl ester	Level 1 - Reference Standard	Methylecgonidine	Methyl (1R,5S)-8-methyl-8-azabicyclo[3.2.1]oct-2-ene-2-carboxylate	50373-10-9	DTXSID20276220	COC(=O)C1=CC[C@@H]2CC[C@H]1N2C	InChI=1S/C10H15NO2/c1-11-7-3-5-8(10(12)13-2)9(11)6-4-7/h5,7,9H,3-4,6H2,1-2H3/t7-,9-/m1/s1	MPSNEAHFGOEKBI-VXNVDRBHSA-N	C10H15NO2	181.11
antipyrine	Level 1 - Reference Standard	Phenazone	1,5-Dimethyl-2-phenyl-1,2-dihydro-3H-pyrazol-3-one	60-80-0	DTXSID6021117	CN1N(C(=O)C=C1C)C1=CC=CC=C1	InChI=1S/C11H12N2O/c1-9-8-11(14)13(12(9)2)10-6-4-3-5-7-10/h3-8H,1-2H3	VEQOALNAAJBPNY-UHFFFAOYSA-N	C11H12N2O	188.095
arginine	Level 1 - Reference Standard	Arginine	Arginine	7200-25-1	DTXSID8022618	NC(CCCNC(N)=N)C(O)=O	InChI=1S/C6H14N4O2/c7-4(5(11)12)2-1-3-10-6(8)9/h4H,1-3,7H2,(H,11,12)(H4,8,9,10)	ODKSFYDXXFIFQN-UHFFFAOYSA-N	C6H14N4O2	174.112
benzoylecgonine	Level 1 - Reference Standard	Benzoylecgonine	(1R,2R,3S,5S)-3-(Benzoyloxy)-8-methyl-8-azabicyclo[3.2.1]octane-2-carboxylic acid	519-09-5	DTXSID7046758	CN1[C@H]2CC[C@@H]1[C@H]([C@H](C2)OC(=O)C1=CC=CC=C1)C(O)=O	InChI=1S/C16H19NO4/c1-17-11-7-8-12(17)14(15(18)19)13(9-11)21-16(20)10-5-3-2-4-6-10/h2-6,11-14H,7-9H2,1H3,(H,18,19)/t11-,12+,13-,14+/m0/s1	GVGYEFKIHJTNQZ-RFQIPJPRSA-N	C16H19NO4	289.131
benzyl-butyl-phthalate	Level 1 - Reference Standard	Benzyl butyl phthalate	Benzyl butyl benzene-1,2-dicarboxylate	85-68-7	DTXSID3020205	CCCCOC(=O)C1=C(C=CC=C1)C(=O)OCC1=CC=CC=C1	InChI=1S/C19H20O4/c1-2-3-13-22-18(20)16-11-7-8-12-17(16)19(21)23-14-15-9-5-4-6-10-15/h4-12H,2-3,13-14H2,1H3	IRIAEXORFWYRCZ-UHFFFAOYSA-N	C19H20O4	312.136
buprenorphine	Level 1 - Reference Standard	Buprenorphine	(5alpha,6beta,14beta,18R)-17-(Cyclopropylmethyl)-18-[(2S)-2-hydroxy-3,3-dimethylbutan-2-yl]-6-methoxy-18,19-dihydro-4,5-epoxy-6,14-ethenomorphinan-3-ol	52485-79-7	DTXSID2022705	[H][C@@]12OC3=C(O)C=CC4=C3[C@@]11CCN(CC3CC3)[C@]([H])(C4)[C@]11CC[C@@]2(OC)[C@]([H])(C1)C(C)(O)C(C)(C)C	InChI=1S/C29H41NO4/c1-25(2,3)26(4,32)20-15-27-10-11-29(20,33-5)24-28(27)12-13-30(16-17-6-7-17)21(27)14-18-8-9-19(31)23(34-24)22(18)28/h8-9,17,20-21,24,31-32H,6-7,10-16H2,1-5H3/t20-,21-,24-,26?,27-,28+,29-/m1/s1	RMRJXGBAOAMLHD-IHFGGWKQSA-N	C29H41NO4	467.304
butylparaben	Level 1 - Reference Standard	Butylparaben	Butyl 4-hydroxybenzoate	94-26-8	DTXSID3020209	CCCCOC(=O)C1=CC=C(O)C=C1	InChI=1S/C11H14O3/c1-2-3-8-14-11(13)9-4-6-10(12)7-5-9/h4-7,12H,2-3,8H2,1H3	QFOHBWFCKVYLES-UHFFFAOYSA-N	C11H14O3	194.094
butylscopolammonium	Level 1 - Reference Standard	N-Butylscopolamine	(1R,2R,4S,5S,7s)-9-Butyl-7-{[(2S)-3-hydroxy-2-phenylpropanoyl]oxy}-9-methyl-3-oxa-9-azatricyclo[3.3.1.0~2,4~]nonan-9-ium	7182-53-8	DTXSID4048145	CCCC[N+]1(C)[C@H]2C[C@@H](C[C@@H]1[C@H]1O[C@@H]21)OC(=O)[C@H](CO)C1=CC=CC=C1	InChI=1S/C21H30NO4/c1-3-4-10-22(2)17-11-15(12-18(22)20-19(17)26-20)25-21(24)16(13-23)14-8-6-5-7-9-14/h5-9,15-20,23H,3-4,10-13H2,1-2H3/q+1/t15-,16-,17-,18+,19-,20+,22?/m1/s1	YBCNXCRZPWQOBR-WVHCHWADSA-N	C21H30NO4	360.217
caffeine	Level 1 - Reference Standard	Caffeine	1,3,7-Trimethyl-3,7-dihydro-1H-purine-2,6-dione	58-08-2	DTXSID0020232	CN1C=NC2=C1C(=O)N(C)C(=O)N2C	InChI=1S/C8H10N4O2/c1-10-4-9-6-5(10)7(13)12(3)8(14)11(6)2/h4H,1-3H3	RYYVLZVUVIJVGH-UHFFFAOYSA-N	C8H10N4O2	194.08
cannabidiol	Level 1 - Reference Standard	(1'S,2'S)-5'-Methyl-4-pentyl-2'-(prop-1-en-2-yl)-1',2',3',4'-tetrahydro[1,1'-biphenyl]-2,6-diol	(1'S,2'S)-5'-Methyl-4-pentyl-2'-(prop-1-en-2-yl)-1',2',3',4'-tetrahydro[1,1'-biphenyl]-2,6-diol	74219-29-7	DTXSID10653182	CCCCCC1=CC(O)=C([C@H]2C=C(C)CC[C@@H]2C(C)=C)C(O)=C1	InChI=1S/C21H30O2/c1-5-6-7-8-16-12-19(22)21(20(23)13-16)18-11-15(4)9-10-17(18)14(2)3/h11-13,17-18,22-23H,2,5-10H2,1,3-4H3/t17-,18+/m1/s1	QHMBSVQNZZTUGM-MSOLQXFVSA-N	C21H30O2	314.225
carnitine	Level 1 - Reference Standard	Carnitine	3-Hydroxy-4-(trimethylazaniumyl)butanoate	461-06-3	DTXSID3022744	C[N+](C)(C)CC(O)CC([O-])=O	InChI=1S/C7H15NO3/c1-8(2,3)5-6(9)4-7(10)11/h6,9H,4-5H2,1-3H3	PHIQHXFUZVPYII-UHFFFAOYSA-N	C7H15NO3	161.105
chlorpromazine	Level 1 - Reference Standard	Chlorpromazine	3-(2-Chloro-10H-phenothiazin-10-yl)-N,N-dimethylpropan-1-amine	50-53-3	DTXSID0022808	CN(C)CCCN1C2=C(SC3=C1C=C(Cl)C=C3)C=CC=C2	InChI=1S/C17H19ClN2S/c1-19(2)10-5-11-20-14-6-3-4-7-16(14)21-17-9-8-13(18)12-15(17)20/h3-4,6-9,12H,5,10-11H2,1-2H3	ZPEIMTDSQAKGNT-UHFFFAOYSA-N	C17H19ClN2S	318.096
chlorprothixene	Level 1 - Reference Standard	Chlorprothixene	(3E)-3-(2-Chloro-9H-thioxanthen-9-ylidene)-N,N-dimethylpropan-1-amine	113-59-7	DTXSID4022810	CN(C)CC\C=C1/C2=CC=CC=C2SC2=C1C=C(Cl)C=C2	InChI=1S/C18H18ClNS/c1-20(2)11-5-7-14-15-6-3-4-8-17(15)21-18-10-9-13(19)12-16(14)18/h3-4,6-10,12H,5,11H2,1-2H3/b14-7+	WSPOMRSOLSGNFJ-VGOFMYFVSA-N	C18H18ClNS	315.085
cinnamoylcocaine	Level 1 - Reference Standard	Cinnamoylcocaine	Methyl (1R,2R,3S,5S)-8-methyl-3-{[(2E)-3-phenylprop-2-enoyl]oxy}-8-azabicyclo[3.2.1]octane-2-carboxylate	521-67-5	DTXSID60893899	[H][C@]12CC[C@]([H])([C@H]([C@H](C1)OC(=O)\C=C\C1=CC=CC=C1)C(=O)OC)N2C	InChI=1S/C19H23NO4/c1-20-14-9-10-15(20)18(19(22)23-2)16(12-14)24-17(21)11-8-13-6-4-3-5-7-13/h3-8,11,14-16,18H,9-10,12H2,1-2H3/b11-8+/t14-,15+,16-,18+/m0/s1	MQIXMJWNEKUAOZ-UYCDZTDFSA-N	C19H23NO4	329.163
cocaethylene	Level 1 - Reference Standard	Cocaethylene	Ethyl (1R,2R,3S,5S)-3-(benzoyloxy)-8-methyl-8-azabicyclo[3.2.1]octane-2-carboxylate	529-38-4	DTXSID20873213	CCOC(=O)[C@@H]1[C@H]2CC[C@@H](C[C@@H]1OC(=O)C1=CC=CC=C1)N2C	InChI=1S/C18H23NO4/c1-3-22-18(21)16-14-10-9-13(19(14)2)11-15(16)23-17(20)12-7-5-4-6-8-12/h4-8,13-16H,3,9-11H2,1-2H3/t13-,14+,15-,16+/m0/s1	NMPOSNRHZIWLLL-XUWVNRHRSA-N	C18H23NO4	317.163
cocaine	Level 1 - Reference Standard	Cocaine	Methyl (2R,3S)-3-(benzoyloxy)-8-methyl-8-azabicyclo[3.2.1]octane-2-carboxylate	50-36-2	DTXSID2038443	COC(=O)[C@@H]1[C@H]2CC[C@@H](C[C@@H]1OC(=O)C1=CC=CC=C1)N2C	InChI=1S/C17H21NO4/c1-18-12-8-9-13(18)15(17(20)21-2)14(10-12)22-16(19)11-6-4-3-5-7-11/h3-7,12-15H,8-10H2,1-2H3/t12-,13+,14-,15+/m0/s1	ZPUCINDJVBIVPJ-LJISPDSOSA-N	C17H21NO4	303.147
codeine	Level 1 - Reference Standard	Codeine	(5alpha,6alpha)-3-Methoxy-17-methyl-7,8-didehydro-4,5-epoxymorphinan-6-ol	76-57-3	DTXSID2020341	COC1=C2O[C@H]3[C@@H](O)C=C[C@H]4[C@H]5CC(C=C1)=C2[C@@]34CCN5C	InChI=1S/C18H21NO3/c1-19-8-7-18-11-4-5-13(20)17(18)22-16-14(21-2)6-3-10(15(16)18)9-12(11)19/h3-6,11-13,17,20H,7-9H2,1-2H3/t11-,12+,13-,17-,18-/m0/s1	OROGSEYTTFOCAN-DNJOTXNNSA-N	C18H21NO3	299.152
corticosterone	Level 1 - Reference Standard	Corticosterone	(11beta)-11,21-Dihydroxypregn-4-ene-3,20-dione	50-22-6	DTXSID6022474	C[C@]12C[C@H](O)[C@H]3[C@@H](CCC4=CC(=O)CC[C@]34C)[C@@H]1CC[C@@H]2C(=O)CO	InChI=1S/C21H30O4/c1-20-8-7-13(23)9-12(20)3-4-14-15-5-6-16(18(25)11-22)21(15,2)10-17(24)19(14)20/h9,14-17,19,22,24H,3-8,10-11H2,1-2H3/t14-,15-,16+,17-,19+,20-,21-/m0/s1	OMFXVFTZEKFJBZ-HJTSIMOOSA-N	C21H30O4	346.214
cortisone	Level 1 - Reference Standard	Cortisone	17,21-Dihydroxypregn-4-ene-3,11,20-trione	53-06-5	DTXSID5022857	C[C@]12CC(=O)[C@H]3[C@@H](CCC4=CC(=O)CC[C@]34C)[C@@H]1CC[C@]2(O)C(=O)CO	InChI=1S/C21H28O5/c1-19-7-5-13(23)9-12(19)3-4-14-15-6-8-21(26,17(25)11-22)20(15,2)10-16(24)18(14)19/h9,14-15,18,22,26H,3-8,10-11H2,1-2H3/t14-,15-,18+,19-,20-,21-/m0/s1	MFYSYFVPBJMHGN-ZPOLXVRWSA-N	C21H28O5	360.194
cotinine	Level 1 - Reference Standard	Cotinine	(5S)-1-Methyl-5-(pyridin-3-yl)pyrrolidin-2-one	486-56-6	DTXSID1047576	CN1[C@@H](CCC1=O)C1=CN=CC=C1	InChI=1S/C10H12N2O/c1-12-9(4-5-10(12)13)8-3-2-6-11-7-8/h2-3,6-7,9H,4-5H2,1H3/t9-/m0/s1	UIKROCXWUNQSPJ-VIFPVBQESA-N	C10H12N2O	176.095
creatine	Level 1 - Reference Standard	Creatine	N-Carbamimidoyl-N-methylglycine	57-00-1	DTXSID1040451	CN(CC(O)=O)C(N)=N	InChI=1S/C4H9N3O2/c1-7(4(5)6)2-3(8)9/h2H2,1H3,(H3,5,6)(H,8,9)	CVSVTCORWBXHQV-UHFFFAOYSA-N	C4H9N3O2	131.069
creatinine	Level 1 - Reference Standard	Creatinine	2-Imino-1-methylimidazolidin-4-one	60-27-5	DTXSID8045987	CN1CC(=O)NC1=N	InChI=1S/C4H7N3O/c1-7-2-3(8)6-4(7)5/h2H2,1H3,(H2,5,6,8)	DDRJAANPRJIHGJ-UHFFFAOYSA-N	C4H7N3O	113.059
desmethyl mirtazapine	Level 1 - Reference Standard	Normirtazapine	Pyrazino[2,1-a]pyrido[2,3-c][2]benzazepine, 1,2,3,4,10,14b-hexahydro-	61337-68-6	NONE	C1CN2C(CN1)C3=CC=CC=C3CC4=C2N=CC=C4	InChI=1S/C16H17N3/c1-2-6-14-12(4-1)10-13-5-3-7-18-16(13)19-9-8-17-11-15(14)19/h1-7,15,17H,8-11H2	FGLAMNFOHWVQOH-UHFFFAOYSA-N	C16H17N3	251.142
diazepam	Level 1 - Reference Standard	Diazepam	7-Chloro-1-methyl-5-phenyl-1,3-dihydro-2H-1,4-benzodiazepin-2-one	439-14-5	DTXSID4020406	CN1C2=C(C=C(Cl)C=C2)C(=NCC1=O)C1=CC=CC=C1	InChI=1S/C16H13ClN2O/c1-19-14-8-7-12(17)9-13(14)16(18-10-15(19)20)11-5-3-2-4-6-11/h2-9H,10H2,1H3	AAOVKJBEBIDNHE-UHFFFAOYSA-N	C16H13ClN2O	284.072
dibenzothiazyldisulfide	Level 1 - Reference Standard	2,2'-Dithiobisbenzothiazole	2,2'-Disulfanediylbis(1,3-benzothiazole)	120-78-5	DTXSID1020146	S(SC1=NC2=C(S1)C=CC=C2)C1=NC2=C(S1)C=CC=C2	InChI=1S/C14H8N2S4/c1-3-7-11-9(5-1)15-13(17-11)19-20-14-16-10-6-2-4-8-12(10)18-14/h1-8H	AFZSMODLJJCVPP-UHFFFAOYSA-N	C14H8N2S4	331.957
dihydrocodeine	Level 1 - Reference Standard	Dihydrocodeine	(5alpha,6alpha)-3-Methoxy-17-methyl-4,5-epoxymorphinan-6-ol	125-28-0	DTXSID5022936	COC1=C2O[C@H]3[C@@H](O)CC[C@H]4[C@H]5CC(C=C1)=C2[C@@]34CCN5C	InChI=1S/C18H23NO3/c1-19-8-7-18-11-4-5-13(20)17(18)22-16-14(21-2)6-3-10(15(16)18)9-12(11)19/h3,6,11-13,17,20H,4-5,7-9H2,1-2H3/t11-,12+,13-,17-,18-/m0/s1	RBOXVHNMENFORY-DNJOTXNNSA-N	C18H23NO3	301.168
diphenylguanidine	Level 1 - Reference Standard	1,3-Diphenylguanidine	N,N'-Diphenylguanidine	102-06-7	DTXSID3025178	N=C(NC1=CC=CC=C1)NC1=CC=CC=C1	InChI=1S/C13H13N3/c14-13(15-11-7-3-1-4-8-11)16-12-9-5-2-6-10-12/h1-10H,(H3,14,15,16)	OWRCNXZUPFZXOS-UHFFFAOYSA-N	C13H13N3	211.111
dosulepin	Level 1 - Reference Standard	Dothiepin	3-(Dibenzo[b,e]thiepin-11(6H)-ylidene)-N,N-dimethylpropan-1-amine	113-53-1	DTXSID2022961	CN(C)CCC=C1C2=CC=CC=C2CSC2=C1C=CC=C2	InChI=1S/C19H21NS/c1-20(2)13-7-11-17-16-9-4-3-8-15(16)14-21-19-12-6-5-10-18(17)19/h3-6,8-12H,7,13-14H2,1-2H3	PHTUQLWOUWZIMZ-UHFFFAOYSA-N	C19H21NS	295.139
ecgoninemethylester	Level 1 - Reference Standard	Ecgonine methyl ester	Methyl (1R,2R,3S,5S)-3-hydroxy-8-methyl-8-azabicyclo[3.2.1]octane-2-carboxylate	7143-09-1	DTXSID00891435	COC(=O)[C@@H]1[C@H]2CC[C@@H](C[C@@H]1O)N2C	InChI=1S/C10H17NO3/c1-11-6-3-4-7(11)9(8(12)5-6)10(13)14-2/h6-9,12H,3-5H2,1-2H3/t6-,7+,8-,9+/m0/s1	QIQNNBXHAYSQRY-UYXSQOIJSA-N	C10H17NO3	199.121
ethylecgonine	Level 1 - Reference Standard	Ecgonine ethyl ester	Ethyl (1S,3S,4R,5R)-3-hydroxy-8-methyl-8-azabicyclo[3.2.1]octane-4-carboxylate	70939-97-8	NONE	CCOC(=O)[C@@H]1[C@H]2CC[C@H](N2C)C[C@@H]1O	InChI=1S/C11H19NO3/c1-3-15-11(14)10-8-5-4-7(12(8)2)6-9(10)13/h7-10,13H,3-6H2,1-2H3/t7-,8+,9-,10+/m0/s1	ABDMBNAKYBUEEX-QCLAVDOMSA-N	C11H19NO3	213.136
ethylparaben	Level 1 - Reference Standard	Ethylparaben	Ethyl 4-hydroxybenzoate	120-47-8	DTXSID9022528	CCOC(=O)C1=CC=C(O)C=C1	InChI=1S/C9H10O3/c1-2-12-9(11)7-3-5-8(10)6-4-7/h3-6,10H,2H2,1H3	NUVBSKCKDOMJSU-UHFFFAOYSA-N	C9H10O3	166.063
flunitrazepam	Level 1 - Reference Standard	Flunitrazepam	5-(2-Fluorophenyl)-1-methyl-7-nitro-1,3-dihydro-2H-1,4-benzodiazepin-2-one	1622-62-4	DTXSID7023065	CN1C2=C(C=C(C=C2)[N+]([O-])=O)C(=NCC1=O)C1=CC=CC=C1F	InChI=1S/C16H12FN3O3/c1-19-14-7-6-10(20(22)23)8-12(14)16(18-9-15(19)21)11-4-2-3-5-13(11)17/h2-8H,9H2,1H3	PPTYJKAXVCCBDU-UHFFFAOYSA-N	C16H12FN3O3	313.086
gabapentin	Level 1 - Reference Standard	Gabapentin	[1-(Aminomethyl)cyclohexyl]acetic acid	60142-96-3	DTXSID0020074	NCC1(CC(O)=O)CCCCC1	InChI=1S/C9H17NO2/c10-7-9(6-8(11)12)4-2-1-3-5-9/h1-7,10H2,(H,11,12)	UGJMXCAKCUNAIE-UHFFFAOYSA-N	C9H17NO2	171.126
glutamic_acid	Level 1 - Reference Standard	DL-Glutamic acid	Glutamic acid	617-65-2	DTXSID0046987	NC(CCC(O)=O)C(O)=O	InChI=1S/C5H9NO4/c6-3(5(9)10)1-2-4(7)8/h3H,1-2,6H2,(H,7,8)(H,9,10)	WHUUTDBJXJRKMK-UHFFFAOYSA-N	C5H9NO4	147.053
glutamine	Level 1 - Reference Standard	DL-Glutamine	Glutamine	6899-04-3	DTXSID1044304	NC(CCC(N)=O)C(O)=O	InChI=1S/C5H10N2O3/c6-3(5(9)10)1-2-4(7)8/h3H,1-2,6H2,(H2,7,8)(H,9,10)	ZDXPYRJPNDTMRX-UHFFFAOYSA-N	C5H10N2O3	146.069
glutathione	Level 1 - Reference Standard	Glutathione	L-gamma-Glutamyl-L-cysteinylglycine	70-18-8	DTXSID6023101	N[C@@H](CCC(=O)N[C@@H](CS)C(=O)NCC(O)=O)C(O)=O	InChI=1S/C10H17N3O6S/c11-5(10(18)19)1-2-7(14)13-6(4-20)9(17)12-3-8(15)16/h5-6,20H,1-4,11H2,(H,12,17)(H,13,14)(H,15,16)(H,18,19)/t5-,6-/m0/s1	RWSXRVCMGQZWBV-WDSKDSINSA-N	C10H17N3O6S	307.084
glycyrrhetinic acid	Level 1 - Reference Standard	Glycyrrhetinic acid	(3beta)-3-Hydroxy-11-oxoolean-12-en-30-oic acid	471-53-4	DTXSID9020669	CC1(C)[C@@H](O)CC[C@@]2(C)[C@H]1CC[C@]1(C)[C@@H]2C(=O)C=C2[C@@H]3C[C@](C)(CC[C@]3(C)CC[C@@]12C)C(O)=O	InChI=1S/C30H46O4/c1-25(2)21-8-11-30(7)23(28(21,5)10-9-22(25)32)20(31)16-18-19-17-27(4,24(33)34)13-12-26(19,3)14-15-29(18,30)6/h16,19,21-23,32H,8-15,17H2,1-7H3,(H,33,34)/t19-,21-,22-,23+,26+,27-,28-,29+,30+/m0/s1	MPDGHEJMBKOTSU-YKLVYJNSSA-N	C30H46O4	470.34
histidine	Level 1 - Reference Standard	Histidine	L-Histidine	71-00-1	DTXSID9023126	N[C@@H](CC1=CN=CN1)C(O)=O	InChI=1S/C6H9N3O2/c7-5(6(10)11)1-4-2-8-3-9-4/h2-3,5H,1,7H2,(H,8,9)(H,10,11)/t5-/m0/s1	HNDVDQJCIGZPNO-YFKPBYRVSA-N	C6H9N3O2	155.069
hydrocortisone	Level 1 - Reference Standard	Hydrocortisone	(11beta)-11,17,21-Trihydroxypregn-4-ene-3,20-dione	50-23-7	DTXSID7020714	C[C@]12C[C@H](O)[C@H]3[C@@H](CCC4=CC(=O)CC[C@]34C)[C@@H]1CC[C@]2(O)C(=O)CO	InChI=1S/C21H30O5/c1-19-7-5-13(23)9-12(19)3-4-14-15-6-8-21(26,17(25)11-22)20(15,2)10-16(24)18(14)19/h9,14-16,18,22,24,26H,3-8,10-11H2,1-2H3/t14-,15-,16-,18+,19-,20-,21-/m0/s1	JYGXADMDTFJGBT-VWUMJDOOSA-N	C21H30O5	362.209
hydroxy mirtazapine	Level 1 - Reference Standard	8-Hydroxy Mirtazapine	2-Methyl-1,2,3,4,10,14b-hexahydropyrazino[2,1-a]pyrido[2,3-c][2]benzazepin-8-ol	102335-57-9	DTXSID60467650	CN1CCN2C(C1)C1=CC=CC=C1CC1=C2N=CC(O)=C1	InChI=1S/C17H19N3O/c1-19-6-7-20-16(11-19)15-5-3-2-4-12(15)8-13-9-14(21)10-18-17(13)20/h2-5,9-10,16,21H,6-8,11H2,1H3	DAWYIZBOUQIVNX-UHFFFAOYSA-N	C17H19N3O	281.153
hydroxy prothipendyl	Level 3 - Characterised by HRMS, position of hydroxy unknown	-	-	-	NONE	-	-	-	C16H19N3OS	301.125
hydroxy quetiapine	Level 3 - Characterised by HRMS, position of hydroxy unknown	-	-	-	NONE	-	-	-	C21H25N3O3S	399.162
hydroxy trazodone	Level 3 - Characterised by HRMS, position of hydroxy unknown	-	-	-	NONE	-	-	-	C19H22ClN5O2	387.146
hypoxanthine	Level 1 - Reference Standard	Hypoxanthine	1,7-Dihydro-6H-purin-6-one	68-94-0	DTXSID8045983	O=C1NC=NC2=C1NC=N2	InChI=1S/C5H4N4O/c10-5-3-4(7-1-6-3)8-2-9-5/h1-2H,(H2,6,7,8,9,10)	FDGQSTZJBFJUBT-UHFFFAOYSA-N	C5H4N4O	136.039
inosine	Level 1 - Reference Standard	Inosine	9-beta-D-Ribofuranosyl-9H-purin-6-ol	58-63-9	DTXSID2045993	OC[C@H]1O[C@H]([C@H](O)[C@@H]1O)N1C=NC2=C1N=CN=C2O	InChI=1S/C10H12N4O5/c15-1-4-6(16)7(17)10(19-4)14-3-13-5-8(14)11-2-12-9(5)18/h2-4,6-7,10,15-17H,1H2,(H,11,12,18)/t4-,6-,7-,10-/m1/s1	UGQMRVRMYYASKQ-KQYNXXCUSA-N	C10H12N4O5	268.081
isoleucine	Level 1 - Reference Standard	DL-Isoleucine	Isoleucine	443-79-8	DTXSID2046882	CC[C@H](C)[C@H](N)C(O)=O	InChI=1S/C6H13NO2/c1-3-4(2)5(7)6(8)9/h4-5H,3,7H2,1-2H3,(H,8,9)/t4-,5-/m0/s1	AGPKZVBTJJNPAG-WHFBIAKZSA-N	C6H13NO2	131.095
kynurenine	Level 1 - Reference Standard	D-Kynurenine	(2R)-2-Amino-4-(2-aminophenyl)-4-oxobutanoic acid	13441-51-5	DTXSID50360767	N[C@H](CC(=O)C1=CC=CC=C1N)C(O)=O	InChI=1S/C10H12N2O3/c11-7-4-2-1-3-6(7)9(13)5-8(12)10(14)15/h1-4,8H,5,11-12H2,(H,14,15)/t8-/m1/s1	YGPSJZOEDVAXAB-MRVPVSSYSA-N	C10H12N2O3	208.085
leucine	Level 1 - Reference Standard	Leucine	L-Leucine	61-90-5	DTXSID9023203	CC(C)C[C@H](N)C(O)=O	InChI=1S/C6H13NO2/c1-4(2)3-5(7)6(8)9/h4-5H,3,7H2,1-2H3,(H,8,9)/t5-/m0/s1	ROHFNLRQFUQHCH-YFKPBYRVSA-N	C6H13NO2	131.095
levodopa	Level 1 - Reference Standard	L-Dopa	3-Hydroxy-L-tyrosine	59-92-7	DTXSID9023209	N[C@@H](CC1=CC=C(O)C(O)=C1)C(O)=O	InChI=1S/C9H11NO4/c10-6(9(13)14)3-5-1-2-7(11)8(12)4-5/h1-2,4,6,11-12H,3,10H2,(H,13,14)/t6-/m0/s1	WTDRDQBEARUVNC-LURJTMIESA-N	C9H11NO4	197.069
linoleic acid	Level 1 - Reference Standard	Linoleic acid	(9Z,12Z)-Octadeca-9,12-dienoic acid	60-33-3	DTXSID2025505	CCCCC\C=C/C\C=C/CCCCCCCC(O)=O	InChI=1S/C18H32O2/c1-2-3-4-5-6-7-8-9-10-11-12-13-14-15-16-17-18(19)20/h6-7,9-10H,2-5,8,11-17H2,1H3,(H,19,20)/b7-6-,10-9-	OYHQOLUKZRVURQ-HZJYTTRNSA-N	C18H32O2	280.24
lisinopril	Level 1 - Reference Standard	Lisinopril	N~2~-[(1S)-1-Carboxy-3-phenylpropyl]-L-lysyl-L-proline	76547-98-3	DTXSID6040537	NCCCC[C@H](N[C@@H](CCC1=CC=CC=C1)C(O)=O)C(=O)N1CCC[C@H]1C(O)=O	InChI=1S/C21H31N3O5/c22-13-5-4-9-16(19(25)24-14-6-10-18(24)21(28)29)23-17(20(26)27)12-11-15-7-2-1-3-8-15/h1-3,7-8,16-18,23H,4-6,9-14,22H2,(H,26,27)(H,28,29)/t16-,17-,18-/m0/s1	RLAWWYSOJDYHDC-BZSNNMDCSA-N	C21H31N3O5	405.226
lysine	Level 1 - Reference Standard	Lysine	L-Lysine	56-87-1	DTXSID6023232	NCCCC[C@H](N)C(O)=O	InChI=1S/C6H14N2O2/c7-4-2-1-3-5(8)6(9)10/h5H,1-4,7-8H2,(H,9,10)/t5-/m0/s1	KDXKERNSBIXSRK-YFKPBYRVSA-N	C6H14N2O2	146.106
metformin	Level 1 - Reference Standard	Metformin	N,N-Dimethyltriimidodicarbonic diamide	657-24-9	DTXSID2023270	CN(C)C(=N)NC(N)=N	InChI=1S/C4H11N5/c1-9(2)4(7)8-3(5)6/h1-2H3,(H5,5,6,7,8)	XZWYZXLIPXDOLR-UHFFFAOYSA-N	C4H11N5	129.101
methadone	Level 1 - Reference Standard	Methadone	6-(Dimethylamino)-4,4-diphenylheptan-3-one	76-99-3	DTXSID7023273	CCC(=O)C(CC(C)N(C)C)(C1=CC=CC=C1)C1=CC=CC=C1	InChI=1S/C21H27NO/c1-5-20(23)21(16-17(2)22(3)4,18-12-8-6-9-13-18)19-14-10-7-11-15-19/h6-15,17H,5,16H2,1-4H3	USSIQXCVUWKGNF-UHFFFAOYSA-N	C21H27NO	309.209
methionine	Level 1 - Reference Standard	(+/-)-Methionine	Methionine	59-51-8	DTXSID9020821	CSCCC(N)C(O)=O	InChI=1S/C5H11NO2S/c1-9-3-2-4(6)5(7)8/h4H,2-3,6H2,1H3,(H,7,8)	FFEARJCKVFRZRR-UHFFFAOYSA-N	C5H11NO2S	149.051
methotrimeprazine	Level 1 - Reference Standard	Levomethotrimeprazine	(2R)-3-(2-Methoxy-10H-phenothiazin-10-yl)-N,N,2-trimethylpropan-1-amine	60-99-1	DTXSID1023289	COC1=CC2=C(SC3=C(C=CC=C3)N2C[C@H](C)CN(C)C)C=C1	InChI=1S/C19H24N2OS/c1-14(12-20(2)3)13-21-16-7-5-6-8-18(16)23-19-10-9-15(22-4)11-17(19)21/h5-11,14H,12-13H2,1-4H3/t14-/m1/s1	VRQVVMDWGGWHTJ-CQSZACIVSA-N	C19H24N2OS	328.161
mirtazapine	Level 1 - Reference Standard	Mirtazapine	2-Methyl-1,2,3,4,10,14b-hexahydropyrazino[2,1-a]pyrido[2,3-c][2]benzazepine	61337-67-5	DTXSID0023325	CN1CCN2C(C1)C1=CC=CC=C1CC1=C2N=CC=C1	InChI=1S/C17H19N3/c1-19-9-10-20-16(12-19)15-7-3-2-5-13(15)11-14-6-4-8-18-17(14)20/h2-8,16H,9-12H2,1H3	RONZAEMNMFQXRA-UHFFFAOYSA-N	C17H19N3	265.158
mirtazapine N-glucuronide	Level 3 - Characterised by HRMS, produced in vivo	Mirtazapine N-Glucuronide	2-β-D-Glucopyranuronosyl-1,2,3,4,10,14b-hexahydro-2-methyl-pyrazino[2,1-a]pyrido[2,3-c][2]benzazepinium	-	NONE	-	-	-	C23H28N3O6	442.198
morphine	Level 1 - Reference Standard	Morphine	(5alpha,6alpha)-17-Methyl-7,8-didehydro-4,5-epoxymorphinan-3,6-diol	57-27-2	DTXSID9023336	CN1CC[C@]23[C@H]4OC5=C(O)C=CC(C[C@@H]1[C@@H]2C=C[C@@H]4O)=C35	InChI=1S/C17H19NO3/c1-18-7-6-17-10-3-5-13(20)16(17)21-15-12(19)4-2-9(14(15)17)8-11(10)18/h2-5,10-11,13,16,19-20H,6-8H2,1H3/t10-,11+,13-,16-,17-/m0/s1	BQJCRHHNABKAKU-KBQPJGBKSA-N	C17H19NO3	285.136
morphine glucuronide	Level 1 - Reference Standard	Morphine glucuronide	(5alpha,6alpha)-3-Hydroxy-17-methyl-7,8-didehydro-4,5-epoxymorphinan-6-yl beta-D-glucopyranosiduronic acid	20290-10-2	DTXSID40174158	CN1CC[C@]23[C@H]4OC5=C(O)C=CC(C[C@@H]1[C@@H]2C=C[C@@H]4O[C@@H]1O[C@@H]([C@@H](O)[C@H](O)[C@H]1O)C(O)=O)=C35	InChI=1S/C23H27NO9/c1-24-7-6-23-10-3-5-13(31-22-17(28)15(26)16(27)19(33-22)21(29)30)20(23)32-18-12(25)4-2-9(14(18)23)8-11(10)24/h2-5,10-11,13,15-17,19-20,22,25-28H,6-8H2,1H3,(H,29,30)/t10-,11+,13-,15-,16-,17+,19-,20-,22+,23-/m0/s1	GNJCUHZOSOYIEC-GAROZEBRSA-N	C23H27NO9	461.169
moxifloxacin	Level 1 - Reference Standard	Moxifloxacin	1-Cyclopropyl-6-fluoro-8-methoxy-7-[(4aS,7aS)-octahydro-6H-pyrrolo[3,4-b]pyridin-6-yl]-4-oxo-1,4-dihydroquinoline-3-carboxylic acid	151096-09-2	DTXSID3048491	[H][C@]12CN(C[C@@]1([H])NCCC2)C1=C(F)C=C2C(=O)C(=CN(C3CC3)C2=C1OC)C(O)=O	InChI=1S/C21H24FN3O4/c1-29-20-17-13(19(26)14(21(27)28)9-25(17)12-4-5-12)7-15(22)18(20)24-8-11-3-2-6-23-16(11)10-24/h7,9,11-12,16,23H,2-6,8,10H2,1H3,(H,27,28)/t11-,16+/m0/s1	FABPRXSRWADJSP-MEDUHNTESA-N	C21H24FN3O4	401.175
naproxen	Level 1 - Reference Standard	Naproxen	(2S)-2-(6-Methoxynaphthalen-2-yl)propanoic acid	22204-53-1	DTXSID4040686	COC1=CC2=CC=C(C=C2C=C1)[C@H](C)C(O)=O	InChI=1S/C14H14O3/c1-9(14(15)16)10-3-4-12-8-13(17-2)6-5-11(12)7-10/h3-9H,1-2H3,(H,15,16)/t9-/m0/s1	CMWTZPSULFXXJA-VIFPVBQESA-N	C14H14O3	230.094
N-desalkyl quetiapine	Level 1 - Reference Standard	Norquetiapine	11-(Piperazin-1-yl)dibenzo[b,f][1,4]thiazepine	5747-48-8	DTXSID30881147	C1CN(CCN1)C1=NC2=C(SC3=C1C=CC=C3)C=CC=C2	InChI=1S/C17H17N3S/c1-3-7-15-13(5-1)17(20-11-9-18-10-12-20)19-14-6-2-4-8-16(14)21-15/h1-8,18H,9-12H2	JLOAJISUHPIQOX-UHFFFAOYSA-N	C17H17N3S	295.114
desalkyl verapamil	Level 1 - Reference Standard	Verapamil metabolite D617	2-(3,4-Dimethoxyphenyl)-2-isopropyl-5-(methylamino)pentanenitrile	34245-14-2	DTXSID40891459	CNCCCC(C#N)(C(C)C)C1=CC(OC)=C(OC)C=C1	InChI=1/C17H26N2O2/c1-13(2)17(12-18,9-6-10-19-3)14-7-8-15(20-4)16(11-14)21-5/h7-8,11,13,19H,6,9-10H2,1-5H3	WLOBUUJURNEQCL-UHFFFAOYSA-N	C17H26N2O2	290.199
neocuproine	Level 1 - Reference Standard	1,10-Phenanthroline, 2,9-dimethyl-	2,9-Dimethyl-1,10-phenanthroline	484-11-7	DTXSID5060065	CC1=CC=C2C=CC3=CC=C(C)N=C3C2=N1	InChI=1S/C14H12N2/c1-9-3-5-11-7-8-12-6-4-10(2)16-14(12)13(11)15-9/h3-8H,1-2H3	IYRGXJIJGHOCFS-UHFFFAOYSA-N	C14H12N2	208.1
nicotinamide	Level 1 - Reference Standard	Niacinamide	Pyridine-3-carboxamide	98-92-0	DTXSID2020929	NC(=O)C1=CC=CN=C1	InChI=1S/C6H6N2O/c7-6(9)5-2-1-3-8-4-5/h1-4H,(H2,7,9)	DFPAKSUCGFBDDF-UHFFFAOYSA-N	C6H6N2O	122.048
nicotine	Level 1 - Reference Standard	Nicotine	3-[(2S)-1-Methylpyrrolidin-2-yl]pyridine	54-11-5	DTXSID1020930	CN1CCC[C@H]1C1=CN=CC=C1	InChI=1S/C10H14N2/c1-12-7-3-5-10(12)9-4-2-6-11-8-9/h2,4,6,8,10H,3,5,7H2,1H3/t10-/m0/s1	SNICXCGAKADSCV-JTQLQIEISA-N	C10H14N2	162.116
norbuprenorphine	Level 1 - Reference Standard	Norbuprenorphine	(5alpha,6beta,14beta,18R)-18-[(2S)-2-Hydroxy-3,3-dimethyl-2-butanyl]-6-methoxy-18,19-dihydro-4,5-epoxy-6,14-ethenomorphinan-3-ol	78715-23-8	DTXSID60891436	[H][C@@]12OC3=C4C(C[C@@]5([H])NCC[C@@]14[C@@]51CC[C@@]2(OC)[C@]([H])(C1)[C@](C)(O)C(C)(C)C)=CC=C3O	InChI=1S/C25H35NO4/c1-21(2,3)22(4,28)16-13-23-8-9-25(16,29-5)20-24(23)10-11-26-17(23)12-14-6-7-15(27)19(30-20)18(14)24/h6-7,16-17,20,26-28H,8-13H2,1-5H3/t16-,17-,20-,22+,23-,24+,25-/m1/s1	YOYLLRBMGQRFTN-IOMBULRVSA-N	C25H35NO4	413.257
norcocaine	Level 1 - Reference Standard	Norcocaine	Methyl 3-benzoyloxy-8-azabicyclo[3.2.1]octane-4-carboxylate	-	NONE	COC(=O)C1C2CCC(N2)CC1OC(=O)C3=CC=CC=C3	InChI=1S/C16H19NO4/c1-20-16(19)14-12-8-7-11(17-12)9-13(14)21-15(18)10-5-3-2-4-6-10/h2-6,11-14,17H,7-9H2,1H3	AYDBLCSLKNTEJL-UHFFFAOYSA-N	C16H19NO4	289.131
nordazepam	Level 1 - Reference Standard	Desmethyldiazepam	7-Chloro-5-phenyl-1,3-dihydro-2H-1,4-benzodiazepin-2-one	1088-11-5	DTXSID2049000	ClC1=CC2=C(NC(=O)CN=C2C2=CC=CC=C2)C=C1	InChI=1S/C15H11ClN2O/c16-11-6-7-13-12(8-11)15(17-9-14(19)18-13)10-4-2-1-3-5-10/h1-8H,9H2,(H,18,19)	AKPLHCDWDRPJGD-UHFFFAOYSA-N	C15H11ClN2O	270.056
norflutoprazepam	Level 1 - Reference Standard	Norfludiazepam	7-Chloro-5-(2-fluorophenyl)-1,3-dihydro-2H-1,4-benzodiazepin-2-one	2886-65-9	DTXSID30183057	FC1=CC=CC=C1C1=NCC(=O)NC2=C1C=C(Cl)C=C2	InChI=1S/C15H10ClFN2O/c16-9-5-6-13-11(7-9)15(18-8-14(20)19-13)10-3-1-2-4-12(10)17/h1-7H,8H2,(H,19,20)	UVCOILFBWYKHHB-UHFFFAOYSA-N	C15H10ClFN2O	288.047
octocrylene	Level 1 - Reference Standard	2-Ethylhexyl-2-cyano-3,3-diphenylacrylate	2-Ethylhexyl 2-cyano-3,3-diphenylprop-2-enoate	6197-30-4	DTXSID9025299	CCCCC(CC)COC(=O)C(C#N)=C(C1=CC=CC=C1)C1=CC=CC=C1	InChI=1S/C24H27NO2/c1-3-5-12-19(4-2)18-27-24(26)22(17-25)23(20-13-8-6-9-14-20)21-15-10-7-11-16-21/h6-11,13-16,19H,3-5,12,18H2,1-2H3	FMJSMJQBSVNSBF-UHFFFAOYSA-N	C24H27NO2	361.204
O-desmethyl verapamil	Level 3 - Characterised by HRMS, position of demethylation unknown	-	-	-	NONE	-	-	-	C26H36N2O4	440.268
ornithine	Level 1 - Reference Standard	L-Ornithine	L-Ornithine	70-26-8	DTXSID00883219	NCCC[C@H](N)C(O)=O	InChI=1S/C5H12N2O2/c6-3-1-2-4(7)5(8)9/h4H,1-3,6-7H2,(H,8,9)/t4-/m0/s1	AHLPHDHHMVZTML-BYPYZUCNSA-N	C5H12N2O2	132.09
oxazepam	Level 1 - Reference Standard	Oxazepam	7-Chloro-3-hydroxy-5-phenyl-1,3-dihydro-2H-1,4-benzodiazepin-2-one	604-75-1	DTXSID1021087	OC1N=C(C2=CC=CC=C2)C2=CC(Cl)=CC=C2NC1=O	InChI=1S/C15H11ClN2O2/c16-10-6-7-12-11(8-10)13(9-4-2-1-3-5-9)18-15(20)14(19)17-12/h1-8,15,20H,(H,17,19)	ADIMAYPTOBDMTL-UHFFFAOYSA-N	C15H11ClN2O2	286.051
oxazepam glucuronide	Level 1 - Reference Standard	Oxazepam glucuronide	(2S,3S,4S,5R,6S)-6-[(7-chloro-2-oxo-5-phenyl-1,3-dihydro-1,4-benzodiazepin-3-yl)oxy]-3,4,5-trihydroxyoxane-2-carboxylic acid	6801-81-6	NONE	C1=CC=C(C=C1)C2=NC(C(=O)NC3=C2C=C(C=C3)Cl)O[C@H]4[C@@H]([C@H]([C@@H]([C@H](O4)C(=O)O)O)O)O	InChI=1S/C21H19ClN2O8/c22-10-6-7-12-11(8-10)13(9-4-2-1-3-5-9)24-19(18(28)23-12)32-21-16(27)14(25)15(26)17(31-21)20(29)30/h1-8,14-17,19,21,25-27H,(H,23,28)(H,29,30)/t14-,15-,16+,17-,19?,21-/m0/s1	FIKQKGFUBZQEBL-IFBJMGMISA-N	C21H19ClN2O8	462.083
oxyquinoline	Level 1 - Reference Standard	8-Hydroxyquinoline	Quinolin-8-ol	148-24-3	DTXSID5020730	OC1=CC=CC2=CC=CN=C12	InChI=1S/C9H7NO/c11-8-5-1-3-7-4-2-6-10-9(7)8/h1-6,11H	MCJGNVYPOGVAJF-UHFFFAOYSA-N	C9H7NO	145.053
pantoprazole	Level 1 - Reference Standard	Pantoprazole	5-(Difluoromethoxy)-2-[(3,4-dimethoxypyridin-2-yl)methanesulfinyl]-1H-benzimidazole	102625-70-7	DTXSID4023416	COC1=C(OC)C(CS(=O)C2=NC3=C(N2)C=CC(OC(F)F)=C3)=NC=C1	InChI=1S/C16H15F2N3O4S/c1-23-13-5-6-19-12(14(13)24-2)8-26(22)16-20-10-4-3-9(25-15(17)18)7-11(10)21-16/h3-7,15H,8H2,1-2H3,(H,20,21)	IQPSEEYGBUAQFF-UHFFFAOYSA-N	C16H15F2N3O4S	383.075
phenylalanine	Level 1 - Reference Standard	Phenylalanine	Phenylalanine	150-30-1	DTXSID9023463	NC(CC1=CC=CC=C1)C(O)=O	InChI=1S/C9H11NO2/c10-8(9(11)12)6-7-4-2-1-3-5-7/h1-5,8H,6,10H2,(H,11,12)	COLNVLDHVKWLRT-UHFFFAOYSA-N	C9H11NO2	165.079
phenylurea	Level 1 - Reference Standard	1-Phenylurea	N-Phenylurea	64-10-8	DTXSID8042507	NC(=O)NC1=CC=CC=C1	InChI=1S/C7H8N2O/c8-7(10)9-6-4-2-1-3-5-6/h1-5H,(H3,8,9,10)	LUBJCRLGQSPQNN-UHFFFAOYSA-N	C7H8N2O	136.064
phthalic acid dibutyl ester	Level 1 - Reference Standard	Dibutyl phthalate	Dibutyl benzene-1,2-dicarboxylate	84-74-2	DTXSID2021781	CCCCOC(=O)C1=CC=CC=C1C(=O)OCCCC	InChI=1S/C16H22O4/c1-3-5-11-19-15(17)13-9-7-8-10-14(13)16(18)20-12-6-4-2/h7-10H,3-6,11-12H2,1-2H3	DOIRQSBPFJWKBE-UHFFFAOYSA-N	C16H22O4	278.152
phthalic acid diethyl ester	Level 1 - Reference Standard	Diethyl phthalate	Diethyl benzene-1,2-dicarboxylate	84-66-2	DTXSID7021780	CCOC(=O)C1=CC=CC=C1C(=O)OCC	InChI=1S/C12H14O4/c1-3-15-11(13)9-7-5-6-8-10(9)12(14)16-4-2/h5-8H,3-4H2,1-2H3	FLKPEMZONWLCSK-UHFFFAOYSA-N	C12H14O4	222.089
pioglitazone	Level 1 - Reference Standard	Pioglitazone	5-({4-[2-(5-Ethylpyridin-2-yl)ethoxy]phenyl}methyl)-1,3-thiazolidine-2,4-dione	111025-46-8	DTXSID3037129	CCC1=CN=C(CCOC2=CC=C(CC3SC(=O)NC3=O)C=C2)C=C1	InChI=1S/C19H20N2O3S/c1-2-13-3-6-15(20-12-13)9-10-24-16-7-4-14(5-8-16)11-17-18(22)21-19(23)25-17/h3-8,12,17H,2,9-11H2,1H3,(H,21,22,23)	HYAFETHFCAUJAY-UHFFFAOYSA-N	C19H20N2O3S	356.119
piperine	Level 1 - Reference Standard	Piperine	(2E,4E)-5-(2H-1,3-Benzodioxol-5-yl)-1-(piperidin-1-yl)penta-2,4-dien-1-one	94-62-2	DTXSID3021805	O=C(\C=C\C=C\C1=CC=C2OCOC2=C1)N1CCCCC1	InChI=1S/C17H19NO3/c19-17(18-10-4-1-5-11-18)7-3-2-6-14-8-9-15-16(12-14)21-13-20-15/h2-3,6-9,12H,1,4-5,10-11,13H2/b6-2+,7-3+	MXXWOMGUGJBKIW-YPCIICBESA-N	C17H19NO3	285.136
prednisolone	Level 1 - Reference Standard	Prednisolone	(11beta)-11,17,21-Trihydroxypregna-1,4-diene-3,20-dione	50-24-8	DTXSID9021184	C[C@]12C[C@H](O)[C@H]3[C@@H](CCC4=CC(=O)C=C[C@]34C)[C@@H]1CC[C@]2(O)C(=O)CO	InChI=1S/C21H28O5/c1-19-7-5-13(23)9-12(19)3-4-14-15-6-8-21(26,17(25)11-22)20(15,2)10-16(24)18(14)19/h5,7,9,14-16,18,22,24,26H,3-4,6,8,10-11H2,1-2H3/t14-,15-,16-,18+,19-,20-,21-/m0/s1	OIGNJSKKLXVSLS-VWUMJDOOSA-N	C21H28O5	360.194
pregabalin	Level 1 - Reference Standard	Pregabalin	(3S)-3-(Aminomethyl)-5-methylhexanoic acid	148553-50-8	DTXSID1045950	CC(C)C[C@H](CN)CC(O)=O	InChI=1S/C8H17NO2/c1-6(2)3-7(5-9)4-8(10)11/h6-7H,3-5,9H2,1-2H3,(H,10,11)/t7-/m0/s1	AYXYPKUFHZROOJ-ZETCQYMHSA-N	C8H17NO2	159.126
proline	Level 1 - Reference Standard	Proline	Proline	609-36-9	DTXSID9041104	OC(=O)C1CCCN1	InChI=1S/C5H9NO2/c7-5(8)4-2-1-3-6-4/h4,6H,1-3H2,(H,7,8)	ONIBWKKTOPOVIA-UHFFFAOYSA-N	C5H9NO2	115.063
propylparaben	Level 1 - Reference Standard	Propylparaben	Propyl 4-hydroxybenzoate	94-13-3	DTXSID4022527	CCCOC(=O)C1=CC=C(O)C=C1	InChI=1S/C10H12O3/c1-2-7-13-10(12)8-3-5-9(11)6-4-8/h3-6,11H,2,7H2,1H3	QELSKZZBTMNZEB-UHFFFAOYSA-N	C10H12O3	180.079
prothipendyl	Level 1 - Reference Standard	Prothipendyl	N,N-Dimethyl-3-(10H-pyrido[3,2-b][1,4]benzothiazin-10-yl)propan-1-amine	303-69-5	DTXSID50184389	CN(C)CCCN1C2=CC=CC=C2SC2=C1N=CC=C2	InChI=1S/C16H19N3S/c1-18(2)11-6-12-19-13-7-3-4-8-14(13)20-15-9-5-10-17-16(15)19/h3-5,7-10H,6,11-12H2,1-2H3	JTTAUPUMOLRVRA-UHFFFAOYSA-N	C16H19N3S	285.13
pseudocumidine	Level 1 - Reference Standard	2,4,5-Trimethylaniline	2,4,5-Trimethylaniline	137-17-7	DTXSID9021398	CC1=CC(C)=C(N)C=C1C	InChI=1S/C9H13N/c1-6-4-8(3)9(10)5-7(6)2/h4-5H,10H2,1-3H3	BMIPMKQAAJKBKP-UHFFFAOYSA-N	C9H13N	135.105
quetiapine	Level 1 - Reference Standard	Quetiapine	2-{2-[4-(Dibenzo[b,f][1,4]thiazepin-11-yl)piperazin-1-yl]ethoxy}ethan-1-ol	111974-69-7	DTXSID9023546	OCCOCCN1CCN(CC1)C1=NC2=C(SC3=C1C=CC=C3)C=CC=C2	InChI=1S/C21H25N3O2S/c25-14-16-26-15-13-23-9-11-24(12-10-23)21-17-5-1-3-7-19(17)27-20-8-4-2-6-18(20)22-21/h1-8,25H,9-16H2	URKOMYMAXPYINW-UHFFFAOYSA-N	C21H25N3O2S	383.167
rosuvastatin	Level 1 - Reference Standard	Rosuvastatin	(3R,5S,6E)-7-[4-(4-Fluorophenyl)-2-[(methanesulfonyl)(methyl)amino]-6-(propan-2-yl)pyrimidin-5-yl]-3,5-dihydroxyhept-6-enoic acid	287714-41-4	DTXSID8048492	CC(C)C1=C(\C=C\[C@@H](O)C[C@@H](O)CC(O)=O)C(=NC(=N1)N(C)S(C)(=O)=O)C1=CC=C(F)C=C1	InChI=1S/C22H28FN3O6S/c1-13(2)20-18(10-9-16(27)11-17(28)12-19(29)30)21(14-5-7-15(23)8-6-14)25-22(24-20)26(3)33(4,31)32/h5-10,13,16-17,27-28H,11-12H2,1-4H3,(H,29,30)/b10-9+/t16-,17-/m1/s1	BPRHUIZQVSMCRT-VEUZHWNKSA-N	C22H28FN3O6S	481.168
serotonin	Level 1 - Reference Standard	Serotonin	3-(2-Aminoethyl)-1H-indol-5-ol	50-67-9	DTXSID8075330	NCCC1=CNC2=CC=C(O)C=C12	InChI=1S/C10H12N2O/c11-4-3-7-6-12-10-2-1-8(13)5-9(7)10/h1-2,5-6,12-13H,3-4,11H2	QZAYGJVTTNCVMB-UHFFFAOYSA-N	C10H12N2O	176.095
spermine	Level 1 - Reference Standard	1,4-Butanediamine, N,N'-bis(3-aminopropyl)-	N~1~,N~4~-Bis(3-aminopropyl)butane-1,4-diamine	71-44-3	DTXSID9058781	NCCCNCCCCNCCCN	InChI=1S/C10H26N4/c11-5-3-9-13-7-1-2-8-14-10-4-6-12/h13-14H,1-12H2	PFNFFQXMRSDOHW-UHFFFAOYSA-N	C10H26N4	202.216
temazepam	Level 1 - Reference Standard	Temazepam	7-Chloro-3-hydroxy-1-methyl-5-phenyl-1,3-dihydro-2H-1,4-benzodiazepin-2-one	846-50-4	DTXSID8021309	CN1C2=CC=C(Cl)C=C2C(=NC(O)C1=O)C1=CC=CC=C1	InChI=1S/C16H13ClN2O2/c1-19-13-8-7-11(17)9-12(13)14(18-15(20)16(19)21)10-5-3-2-4-6-10/h2-9,15,20H,1H3	SEQDDYPDSLOBDC-UHFFFAOYSA-N	C16H13ClN2O2	300.067
testosterone	Level 1 - Reference Standard	Testosterone	(17beta)-17-Hydroxyandrost-4-en-3-one	58-22-0	DTXSID8022371	C[C@]12CC[C@H]3[C@@H](CCC4=CC(=O)CC[C@]34C)[C@@H]1CC[C@@H]2O	InChI=1S/C19H28O2/c1-18-9-7-13(20)11-12(18)3-4-14-15-5-6-17(21)19(15,2)10-8-16(14)18/h11,14-17,21H,3-10H2,1-2H3/t14-,15-,16-,17-,18-,19-/m0/s1	MUMGGOZAMZWBJJ-DYKIIFRCSA-N	C19H28O2	288.209
theobromine	Level 1 - Reference Standard	Theobromine	3,7-Dimethyl-3,7-dihydro-1H-purine-2,6-dione	83-67-0	DTXSID9026132	CN1C=NC2=C1C(=O)NC(=O)N2C	InChI=1S/C7H8N4O2/c1-10-3-8-5-4(10)6(12)9-7(13)11(5)2/h3H,1-2H3,(H,9,12,13)	YAPQBXQYLJRXSA-UHFFFAOYSA-N	C7H8N4O2	180.065
theophylline	Level 1 - Reference Standard	Theophylline	1,3-Dimethyl-3,7-dihydro-1H-purine-2,6-dione	58-55-9	DTXSID5021336	CN1C2=C(NC=N2)C(=O)N(C)C1=O	InChI=1S/C7H8N4O2/c1-10-5-4(8-3-9-5)6(12)11(2)7(10)13/h3H,1-2H3,(H,8,9)	ZFXYFBGIUFBOJW-UHFFFAOYSA-N	C7H8N4O2	180.065
thiamine	Level 1 - Reference Standard	Thiamine	3-[(4-Amino-2-methylpyrimidin-5-yl)methyl]-5-(2-hydroxyethyl)-4-methyl-1,3-thiazol-3-ium	70-16-6	DTXSID50220251	CC1=C(CCO)SC=[N+]1CC1=CN=C(C)N=C1N	InChI=1S/C12H17N4OS/c1-8-11(3-4-17)18-7-16(8)6-10-5-14-9(2)15-12(10)13/h5,7,17H,3-4,6H2,1-2H3,(H2,13,14,15)/q+1	JZRWCGZRTZMZEH-UHFFFAOYSA-N	C12H17N4OS	265.112
thymine	Level 1 - Reference Standard	Thymine	5-Methylpyrimidine-2,4(1H,3H)-dione	65-71-4	DTXSID4052342	CC1=CNC(=O)NC1=O	InChI=1S/C5H6N2O2/c1-3-2-6-5(9)7-4(3)8/h2H,1H3,(H2,6,7,8,9)	RWQNBRDOKXIBIV-UHFFFAOYSA-N	C5H6N2O2	126.043
trazodone	Level 1 - Reference Standard	Trazodone	2-{3-[4-(3-Chlorophenyl)piperazin-1-yl]propyl}[1,2,4]triazolo[4,3-a]pyridin-3(2H)-one	19794-93-5	DTXSID5045043	ClC1=CC=CC(=C1)N1CCN(CCCN2N=C3C=CC=CN3C2=O)CC1	InChI=1S/C19H22ClN5O/c20-16-5-3-6-17(15-16)23-13-11-22(12-14-23)8-4-10-25-19(26)24-9-2-1-7-18(24)21-25/h1-3,5-7,9,15H,4,8,10-14H2	PHLBKPHSAVXXEF-UHFFFAOYSA-N	C19H22ClN5O	371.151
tri(butoxyethyl)phosphate	Level 1 - Reference Standard	Tris(2-butoxyethyl) phosphate	Tris(2-butoxyethyl) phosphate	78-51-3	DTXSID5021758	CCCCOCCOP(=O)(OCCOCCCC)OCCOCCCC	InChI=1S/C18H39O7P/c1-4-7-10-20-13-16-23-26(19,24-17-14-21-11-8-5-2)25-18-15-22-12-9-6-3/h4-18H2,1-3H3	WTLBZVNBAKMVDP-UHFFFAOYSA-N	C18H39O7P	398.243
tributylphosphate	Level 1 - Reference Standard	Tributyl phosphate	Tributyl phosphate	126-73-8	DTXSID3021986	CCCCOP(=O)(OCCCC)OCCCC	InChI=1S/C12H27O4P/c1-4-7-10-14-17(13,15-11-8-5-2)16-12-9-6-3/h4-12H2,1-3H3	STCOOQWBFONSKY-UHFFFAOYSA-N	C12H27O4P	266.165
triiodothyronine	Level 1 - Reference Standard	3,5,3'-Triiodothyronine	O-(4-Hydroxy-3-iodophenyl)-3,5-diiodo-L-tyrosine	6893-02-3	DTXSID8023216	N[C@@H](CC1=CC(I)=C(OC2=CC(I)=C(O)C=C2)C(I)=C1)C(O)=O	InChI=1S/C15H12I3NO4/c16-9-6-8(1-2-13(9)20)23-14-10(17)3-7(4-11(14)18)5-12(19)15(21)22/h1-4,6,12,20H,5,19H2,(H,21,22)/t12-/m0/s1	AUYYCJSJGJYCDS-LBPRGKRZSA-N	C15H12I3NO4	650.79
triphenylphosphate	Level 1 - Reference Standard	Triphenyl phosphate	Triphenyl phosphate	115-86-6	DTXSID1021952	O=P(OC1=CC=CC=C1)(OC1=CC=CC=C1)OC1=CC=CC=C1	InChI=1S/C18H15O4P/c19-23(20-16-10-4-1-5-11-16,21-17-12-6-2-7-13-17)22-18-14-8-3-9-15-18/h1-15H	XZZNDPSIHUTMOC-UHFFFAOYSA-N	C18H15O4P	326.071
tryptophan	Level 1 - Reference Standard	dl-Tryptophan	Tryptophan	54-12-6	DTXSID0021418	NC(CC1=CNC2=CC=CC=C12)C(O)=O	InChI=1S/C11H12N2O2/c12-9(11(14)15)5-7-6-13-10-4-2-1-3-8(7)10/h1-4,6,9,13H,5,12H2,(H,14,15)	QIVBCDIJIAJPQS-UHFFFAOYSA-N	C11H12N2O2	204.09
tyrosine	Level 1 - Reference Standard	L-Tyrosine	L-Tyrosine	60-18-4	DTXSID1023730	N[C@@H](CC1=CC=C(O)C=C1)C(O)=O	InChI=1S/C9H11NO3/c10-8(9(12)13)5-6-1-3-7(11)4-2-6/h1-4,8,11H,5,10H2,(H,12,13)/t8-/m0/s1	OUYCCCASQSFEME-QMMMGPOBSA-N	C9H11NO3	181.074
urapidil	Level 1 - Reference Standard	Urapidil	6-({3-[4-(2-Methoxyphenyl)piperazin-1-yl]propyl}amino)-1,3-dimethylpyrimidine-2,4(1H,3H)-dione	34661-75-1	DTXSID9021425	COC1=C(C=CC=C1)N1CCN(CCCNC2=CC(=O)N(C)C(=O)N2C)CC1	InChI=1S/C20H29N5O3/c1-22-18(15-19(26)23(2)20(22)27)21-9-6-10-24-11-13-25(14-12-24)16-7-4-5-8-17(16)28-3/h4-5,7-8,15,21H,6,9-14H2,1-3H3	ICMGLRUYEQNHPF-UHFFFAOYSA-N	C20H29N5O3	387.227
valin	Level 1 - Reference Standard	L-Valine	L-Valine	72-18-4	DTXSID40883233	CC(C)[C@H](N)C(O)=O	InChI=1S/C5H11NO2/c1-3(2)4(6)5(7)8/h3-4H,6H2,1-2H3,(H,7,8)/t4-/m0/s1	KZSNJWFQEVHDMF-BYPYZUCNSA-N	C5H11NO2	117.079
vitamin D3	Level 1 - Reference Standard	Vitamin D3	(3S,5Z,7E)-9,10-Secocholesta-5,7,10-trien-3-ol	67-97-0	DTXSID6026294	[H][C@@]1(CC[C@@]2([H])\C(CCC[C@]12C)=C\C=C1\C[C@@H](O)CCC1=C)[C@H](C)CCCC(C)C	InChI=1S/C27H44O/c1-19(2)8-6-9-21(4)25-15-16-26-22(10-7-17-27(25,26)5)12-13-23-18-24(28)14-11-20(23)3/h12-13,19,21,24-26,28H,3,6-11,14-18H2,1-2,4-5H3/b22-12+,23-13-/t21-,24+,25-,26+,27-/m1/s1	QYSXJUFSXHHAJI-YRZJJWOYSA-N	C27H44O	384.339
xanthine	Level 1 - Reference Standard	Xanthine	3,7-Dihydro-1H-purine-2,6-dione	69-89-6	DTXSID4035120	O=C1NC2=C(NC=N2)C(=O)N1	InChI=1S/C5H4N4O2/c10-4-2-3(7-1-6-2)8-5(11)9-4/h1H,(H3,6,7,8,9,10,11)	LRFVTYWOQMYALW-UHFFFAOYSA-N	C5H4N4O2	152.033
zolpidem carboxylic acid	Level 1 - Reference Standard	Zolpidem carboxylic acid	4-{3-[2-(Dimethylamino)-2-oxoethyl]-6-methylimidazo[1,2-a]pyridin-2-yl}benzoic acid	109461-65-6	DTXSID50148941	CN(C)C(=O)CC1=C(N=C2C=CC(C)=CN12)C1=CC=C(C=C1)C(O)=O	InChI=1S/C19H19N3O3/c1-12-4-9-16-20-18(13-5-7-14(8-6-13)19(24)25)15(22(16)11-12)10-17(23)21(2)3/h4-9,11H,10H2,1-3H3,(H,24,25)	FELZONDEFBLTSP-UHFFFAOYSA-N	C19H19N3O3	337.143
10,11-trans-dihydroxy-10,11-dihydrocarbamazepine	Level 1 - Reference Standard	trans-10,11-Dihydroxy-10,11-dihydrocarbazepine	(10S,11S)-10,11-Dihydroxy-10,11-dihydro-5H-dibenzo[b,f]azepine-5-carboxamide	58955-93-4	DTXSID10891461	NC(=O)N1C2=CC=CC=C2[C@H](O)[C@@H](O)C2=C1C=CC=C2	InChI=1S/C15H14N2O3/c16-15(20)17-11-7-3-1-5-9(11)13(18)14(19)10-6-2-4-8-12(10)17/h1-8,13-14,18-19H,(H2,16,20)/t13-,14-/m0/s1	PRGQOPPDPVELEG-KBPBESRZSA-N	C15H14N2O3	270.1
1H-benzotriazole	Level 1 - Reference Standard	1,2,3-Benzotriazole	1H-Benzotriazole	95-14-7	DTXSID6020147	N1N=NC2=C1C=CC=C2	InChI=1S/C6H5N3/c1-2-4-6-5(3-1)7-9-8-6/h1-4H,(H,7,8,9)	QRUDEWIWKLJBPS-UHFFFAOYSA-N	C6H5N3	119.048
3,4-methylenedioxymethamphetamine	Level 1 - Reference Standard	MDMA	1-(2H-1,3-Benzodioxol-5-yl)-N-methylpropan-2-amine	42542-10-9	DTXSID90860791	CNC(C)CC1=CC2=C(OCO2)C=C1	InChI=1S/C11H15NO2/c1-8(12-2)5-9-3-4-10-11(6-9)14-7-13-10/h3-4,6,8,12H,5,7H2,1-2H3	SHXWCVYOXRDMCX-UHFFFAOYSA-N	C11H15NO2	193.11
4,4'-bipyridyl	Level 1 - Reference Standard	4,4'-Bipyridine	4,4'-Bipyridine	553-26-4	DTXSID2027200	C1=CC(=CC=N1)C1=CC=NC=C1	InChI=1S/C10H8N2/c1-5-11-6-2-9(1)10-3-7-12-8-4-10/h1-8H	MWVTWFVJZLCBMC-UHFFFAOYSA-N	C10H8N2	156.069
4-aminoacetophenone	Level 1 - Reference Standard	4-Aminoacetophenone	1-(4-Aminophenyl)ethan-1-one	99-92-3	DTXSID6052669	CC(=O)C1=CC=C(N)C=C1	InChI=1S/C8H9NO/c1-6(10)7-2-4-8(9)5-3-7/h2-5H,9H2,1H3	GPRYKVSEZCQIHD-UHFFFAOYSA-N	C8H9NO	135.068
4-aminoantipyrine	Level 1 - Reference Standard	Ampyrone	4-Amino-1,5-dimethyl-2-phenyl-1,2-dihydro-3H-pyrazol-3-one	83-07-8	DTXSID8048860	CN1N(C(=O)C(N)=C1C)C1=CC=CC=C1	InChI=1S/C11H13N3O/c1-8-10(12)11(15)14(13(8)2)9-6-4-3-5-7-9/h3-7H,12H2,1-2H3	RLFWWDJHLFCNIJ-UHFFFAOYSA-N	C11H13N3O	203.106
5-methyl-1H-benzotriazole	Level 1 - Reference Standard	5-Methyl-1H-benzotriazole	5-Methyl-1H-benzotriazole	136-85-6	DTXSID1038743	CC1=CC2=C(NN=N2)C=C1	InChI=1S/C7H7N3/c1-5-2-3-6-7(4-5)9-10-8-6/h2-4H,1H3,(H,8,9,10)	LRUDIIUSNGCQKF-UHFFFAOYSA-N	C7H7N3	133.064
abacavir	Level 1 - Reference Standard	Abacavir	{(1S,4S)-4-[2-Amino-6-(cyclopropylamino)-9H-purin-9-yl]cyclopent-2-en-1-yl}methanol	136470-78-5	DTXSID4046444	NC1=NC(NC2CC2)=C2N=CN([C@H]3C[C@H](CO)C=C3)C2=N1	InChI=1S/C14H18N6O/c15-14-18-12(17-9-2-3-9)11-13(19-14)20(7-16-11)10-4-1-8(5-10)6-21/h1,4,7-10,21H,2-3,5-6H2,(H3,15,17,18,19)/t8-,10-/m1/s1	MCGSCOLBFJQGHM-PSASIEDQSA-N	C14H18N6O	286.154
acyclovir	Level 1 - Reference Standard	Acyclovir	2-Amino-9-[(2-hydroxyethoxy)methyl]-1,9-dihydro-6H-purin-6-one	59277-89-3	DTXSID1022556	NC1=NC2=C(N=CN2COCCO)C(=O)N1	InChI=1S/C8H11N5O3/c9-8-11-6-5(7(15)12-8)10-3-13(6)4-16-2-1-14/h3,14H,1-2,4H2,(H3,9,11,12,15)	MKUXAQIIEYXACX-UHFFFAOYSA-N	C8H11N5O3	225.086
adenine	Level 1 - Reference Standard	Adenine	9H-Purin-6-amine	73-24-5	DTXSID6022557	NC1=NC=NC2=C1N=CN2	InChI=1S/C5H5N5/c6-4-3-5(9-1-7-3)10-2-8-4/h1-2H,(H3,6,7,8,9,10)	GFFGJBXGBJISGV-UHFFFAOYSA-N	C5H5N5	135.054
allopurinol	Level 1 - Reference Standard	Allopurinol	1H-Pyrazolo[3,4-d]pyrimidin-4-ol	315-30-0	DTXSID4022573	OC1=NC=NC2=C1C=NN2	InChI=1S/C5H4N4O/c10-5-3-1-8-9-4(3)6-2-7-5/h1-2H,(H2,6,7,8,9,10)	OFCNXPDARWKPPY-UHFFFAOYSA-N	C5H4N4O	136.039
amantadine	Level 1 - Reference Standard	Amantadine	Adamantan-1-amine	768-94-5	DTXSID8022117	NC12CC3CC(CC(C3)C1)C2	InChI=1S/C10H17N/c11-10-4-7-1-8(5-10)3-9(2-7)6-10/h7-9H,1-6,11H2	DKNWSYNQZKUICI-UHFFFAOYSA-N	C10H17N	151.136
amisulpride	Level 1 - Reference Standard	Amisulpride	4-Amino-5-(ethanesulfonyl)-N-[(1-ethylpyrrolidin-2-yl)methyl]-2-methoxybenzamide	71675-85-9	DTXSID5042613	CCN1CCCC1CNC(=O)C1=CC(=C(N)C=C1OC)S(=O)(=O)CC	InChI=1S/C17H27N3O4S/c1-4-20-8-6-7-12(20)11-19-17(21)13-9-16(25(22,23)5-2)14(18)10-15(13)24-3/h9-10,12H,4-8,11,18H2,1-3H3,(H,19,21)	NTJOBXMMWNYJFB-UHFFFAOYSA-N	C17H27N3O4S	369.172
amitriptyline	Level 1 - Reference Standard	Amitriptyline	3-(10,11-Dihydro-5H-dibenzo[a,d][7]annulen-5-ylidene)-N,N-dimethylpropan-1-amine	50-48-6	DTXSID7022594	CN(C)CCC=C1C2=CC=CC=C2CCC2=C1C=CC=C2	InChI=1S/C20H23N/c1-21(2)15-7-12-20-18-10-5-3-8-16(18)13-14-17-9-4-6-11-19(17)20/h3-6,8-12H,7,13-15H2,1-2H3	KRMDCWKBEZIMAB-UHFFFAOYSA-N	C20H23N	277.183
amphetamine	Level 1 - Reference Standard	Amphetamine	1-Phenylpropan-2-amine	300-62-9	DTXSID4022600	CC(N)CC1=CC=CC=C1	InChI=1S/C9H13N/c1-8(10)7-9-5-3-2-4-6-9/h2-6,8H,7,10H2,1H3	KWTSXDURSIMDCE-UHFFFAOYSA-N	C9H13N	135.105
atenolol	Level 1 - Reference Standard	Atenolol	2-(4-{2-Hydroxy-3-[(propan-2-yl)amino]propoxy}phenyl)acetamide	29122-68-7	DTXSID2022628	CC(C)NCC(O)COC1=CC=C(CC(N)=O)C=C1	InChI=1S/C14H22N2O3/c1-10(2)16-8-12(17)9-19-13-5-3-11(4-6-13)7-14(15)18/h3-6,10,12,16-17H,7-9H2,1-2H3,(H2,15,18)	METKIMKYRPQLGS-UHFFFAOYSA-N	C14H22N2O3	266.163
atenolol acid	Level 1 - Reference Standard	Metoprolol acid	(4-{2-Hydroxy-3-[(propan-2-yl)amino]propoxy}phenyl)acetic acid	56392-14-4	DTXSID70881080	CC(C)NCC(O)COC1=CC=C(CC(O)=O)C=C1	InChI=1S/C14H21NO4/c1-10(2)15-8-12(16)9-19-13-5-3-11(4-6-13)7-14(17)18/h3-6,10,12,15-16H,7-9H2,1-2H3,(H,17,18)	PUQIRTNPJRFRCZ-UHFFFAOYSA-N	C14H21NO4	267.147
baclofen	Level 1 - Reference Standard	Baclofen	4-Amino-3-(4-chlorophenyl)butanoic acid	1134-47-0	DTXSID5022641	NCC(CC(O)=O)C1=CC=C(Cl)C=C1	InChI=1S/C10H12ClNO2/c11-9-3-1-7(2-4-9)8(6-12)5-10(13)14/h1-4,8H,5-6,12H2,(H,13,14)	KPYSYYIEGFHWSV-UHFFFAOYSA-N	C10H12ClNO2	213.056
benzidine	Level 1 - Reference Standard	Benzidine	[1,1'-Biphenyl]-4,4'-diamine	92-87-5	DTXSID2020137	NC1=CC=C(C=C1)C1=CC=C(N)C=C1	InChI=1S/C12H12N2/c13-11-5-1-9(2-6-11)10-3-7-12(14)8-4-10/h1-8H,13-14H2	HFACYLZERDEVSX-UHFFFAOYSA-N	C12H12N2	184.1
benzothiazole	Level 1 - Reference Standard	Benzothiazole	1,3-Benzothiazole	95-16-9	DTXSID7024586	S1C=NC2=CC=CC=C12	InChI=1S/C7H5NS/c1-2-4-7-6(3-1)8-5-9-7/h1-5H	IOJUPLGTWVMSFF-UHFFFAOYSA-N	C7H5NS	135.014
bisoprolol	Level 1 - Reference Standard	Bisoprolol	1-[(Propan-2-yl)amino]-3-[4-({2-[(propan-2-yl)oxy]ethoxy}methyl)phenoxy]propan-2-ol	66722-44-9	DTXSID6022682	CC(C)NCC(O)COC1=CC=C(COCCOC(C)C)C=C1	InChI=1S/C18H31NO4/c1-14(2)19-11-17(20)13-23-18-7-5-16(6-8-18)12-21-9-10-22-15(3)4/h5-8,14-15,17,19-20H,9-13H2,1-4H3	VHYCDWMUTMEGQY-UHFFFAOYSA-N	C18H31NO4	325.225
bupropion	Level 1 - Reference Standard	Bupropion	2-(tert-Butylamino)-1-(3-chlorophenyl)propan-1-one	34911-55-2	DTXSID7022706	CC(NC(C)(C)C)C(=O)C1=CC=CC(Cl)=C1	InChI=1S/C13H18ClNO/c1-9(15-13(2,3)4)12(16)10-6-5-7-11(14)8-10/h5-9,15H,1-4H3	SNPPWIUOZRMYNY-UHFFFAOYSA-N	C13H18ClNO	239.108
carbamazepine	Level 1 - Reference Standard	Carbamazepine	5H-Dibenzo[b,f]azepine-5-carboxamide	298-46-4	DTXSID4022731	NC(=O)N1C2=CC=CC=C2C=CC2=C1C=CC=C2	InChI=1S/C15H12N2O/c16-15(18)17-13-7-3-1-5-11(13)9-10-12-6-2-4-8-14(12)17/h1-10H,(H2,16,18)	FFGPTBGBLSHEPO-UHFFFAOYSA-N	C15H12N2O	236.095
carbamazepine-10,11-epoxide	Level 1 - Reference Standard	Carbamazepine epoxide	1a,10b-Dihydro-6H-dibenzo[b,f]oxireno[d]azepine-6-carboxamide	36507-30-9	DTXSID60891456	NC(=O)N1C2=C(C=CC=C2)C2OC2C2=C1C=CC=C2	InChI=1S/C15H12N2O2/c16-15(18)17-11-7-3-1-5-9(11)13-14(19-13)10-6-2-4-8-12(10)17/h1-8,13-14H,(H2,16,18)	ZRWWEEVEIOGMMT-UHFFFAOYSA-N	C15H12N2O2	252.09
cephalexin	Level 1 - Reference Standard	Cephalexin	(6R,7R)-7-{[(2R)-2-Amino-2-phenylacetyl]amino}-3-methyl-8-oxo-5-thia-1-azabicyclo[4.2.0]oct-2-ene-2-carboxylic acid	15686-71-2	DTXSID9022780	CC1=C(N2[C@H](SC1)[C@H](NC(=O)[C@H](N)C1=CC=CC=C1)C2=O)C(O)=O	InChI=1S/C16H17N3O4S/c1-8-7-24-15-11(14(21)19(15)12(8)16(22)23)18-13(20)10(17)9-5-3-2-4-6-9/h2-6,10-11,15H,7,17H2,1H3,(H,18,20)(H,22,23)/t10-,11-,15-/m1/s1	ZAIPMKNFIOOWCQ-UEKVPHQBSA-N	C16H17N3O4S	347.094
cetirizine	Level 1 - Reference Standard	Cetirizine	(2-{4-[(4-Chlorophenyl)(phenyl)methyl]piperazin-1-yl}ethoxy)acetic acid	83881-51-0	DTXSID4022787	OC(=O)COCCN1CCN(CC1)C(C1=CC=CC=C1)C1=CC=C(Cl)C=C1	InChI=1S/C21H25ClN2O3/c22-19-8-6-18(7-9-19)21(17-4-2-1-3-5-17)24-12-10-23(11-13-24)14-15-27-16-20(25)26/h1-9,21H,10-16H2,(H,25,26)	ZKLPARSLTMPFCP-UHFFFAOYSA-N	C21H25ClN2O3	388.155
cetrimonium	Level 1 - Reference Standard	Hexadecyltrimethylammonium	N,N,N-Trimethylhexadecan-1-aminium	6899-10-1	DTXSID3047978	CCCCCCCCCCCCCCCC[N+](C)(C)C	InChI=1S/C19H42N/c1-5-6-7-8-9-10-11-12-13-14-15-16-17-18-19-20(2,3)4/h5-19H2,1-4H3/q+1	RLGQACBPNDBWTB-UHFFFAOYSA-N	C19H42N	284.331
ciprofloxacin	Level 1 - Reference Standard	Ciprofloxacin	1-Cyclopropyl-6-fluoro-4-oxo-7-(piperazin-1-yl)-1,4-dihydroquinoline-3-carboxylic acid	85721-33-1	DTXSID8022824	OC(=O)C1=CN(C2CC2)C2=CC(N3CCNCC3)=C(F)C=C2C1=O	InChI=1S/C17H18FN3O3/c18-13-7-11-14(8-15(13)20-5-3-19-4-6-20)21(10-1-2-10)9-12(16(11)22)17(23)24/h7-10,19H,1-6H2,(H,23,24)	MYSWGUAQZAJSOK-UHFFFAOYSA-N	C17H18FN3O3	331.133
climbazol	Level 1 - Reference Standard	Climbazole	1-(4-Chlorophenoxy)-1-(1H-imidazol-1-yl)-3,3-dimethylbutan-2-one	38083-17-9	DTXSID6046555	CC(C)(C)C(=O)C(OC1=CC=C(Cl)C=C1)N1C=CN=C1	InChI=1S/C15H17ClN2O2/c1-15(2,3)13(19)14(18-9-8-17-10-18)20-12-6-4-11(16)5-7-12/h4-10,14H,1-3H3	OWEGWHBOCFMBLP-UHFFFAOYSA-N	C15H17ClN2O2	292.098
clindamycin	Level 1 - Reference Standard	Clindamycin	Methyl 7-chloro-6,7,8-trideoxy-6-{[(4R)-1-methyl-4-propyl-L-prolyl]amino}-1-thio-L-threo-alpha-D-galacto-octopyranoside	18323-44-9	DTXSID2022836	CCC[C@@H]1C[C@H](N(C)C1)C(=O)N[C@H]([C@H](C)Cl)[C@H]1O[C@H](SC)[C@H](O)[C@@H](O)[C@H]1O	InChI=1S/C18H33ClN2O5S/c1-5-6-10-7-11(21(3)8-10)17(25)20-12(9(2)19)16-14(23)13(22)15(24)18(26-16)27-4/h9-16,18,22-24H,5-8H2,1-4H3,(H,20,25)/t9-,10+,11-,12+,13-,14+,15+,16+,18+/m0/s1	KDLRVYVGXIQJDK-AWPVFWJPSA-N	C18H33ClN2O5S	424.18
desmethyl citalopram	Level 1 - Reference Standard	desmethylcitalopram	1-(4-Fluorophenyl)-1-[3-(methylamino)propyl]-1,3-dihydro-2-benzofuran-5-carbonitrile	62498-67-3	DTXSID90881082	CNCCCC1(OCC2=CC(=CC=C12)C#N)C1=CC=C(F)C=C1	InChI=1S/C19H19FN2O/c1-22-10-2-9-19(16-4-6-17(20)7-5-16)18-8-3-14(12-21)11-15(18)13-23-19/h3-8,11,22H,2,9-10,13H2,1H3	PTJADDMMFYXMMG-UHFFFAOYSA-N	C19H19FN2O	310.148
diclofenac	Level 1 - Reference Standard	Diclofenac	[2-(2,6-Dichloroanilino)phenyl]acetic acid	15307-86-5	DTXSID6022923	OC(=O)CC1=C(NC2=C(Cl)C=CC=C2Cl)C=CC=C1	InChI=1S/C14H11Cl2NO2/c15-10-5-3-6-11(16)14(10)17-12-7-2-1-4-9(12)8-13(18)19/h1-7,17H,8H2,(H,18,19)	DCOPUUMXTXDBNB-UHFFFAOYSA-N	C14H11Cl2NO2	295.017
diethyl-phthalate	Level 1 - Reference Standard	Diethyl phthalate	Diethyl benzene-1,2-dicarboxylate	84-66-2	DTXSID7021780	CCOC(=O)C1=CC=CC=C1C(=O)OCC	InChI=1S/C12H14O4/c1-3-15-11(13)9-7-5-6-8-10(9)12(14)16-4-2/h5-8H,3-4H2,1-2H3	FLKPEMZONWLCSK-UHFFFAOYSA-N	C12H14O4	222.089
dimethyl-phthalate	Level 1 - Reference Standard	Dimethyl phthalate	Dimethyl benzene-1,2-dicarboxylate	131-11-3	DTXSID3022455	COC(=O)C1=C(C=CC=C1)C(=O)OC	InChI=1S/C10H10O4/c1-13-9(11)7-5-3-4-6-8(7)10(12)14-2/h3-6H,1-2H3	NIQCNGHVCWTJSM-UHFFFAOYSA-N	C10H10O4	194.058
di-n-butyl phthalate	Level 1 - Reference Standard	Dibutyl phthalate	Dibutyl benzene-1,2-dicarboxylate	84-74-2	DTXSID2021781	CCCCOC(=O)C1=CC=CC=C1C(=O)OCCCC	InChI=1S/C16H22O4/c1-3-5-11-19-15(17)13-9-7-8-10-14(13)16(18)20-12-6-4-2/h7-10H,3-6,11-12H2,1-2H3	DOIRQSBPFJWKBE-UHFFFAOYSA-N	C16H22O4	278.152
diphenhydramine	Level 1 - Reference Standard	Diphenhydramine	2-(Diphenylmethoxy)-N,N-dimethylethan-1-amine	58-73-1	DTXSID4022949	CN(C)CCOC(C1=CC=CC=C1)C1=CC=CC=C1	InChI=1S/C17H21NO/c1-18(2)13-14-19-17(15-9-5-3-6-10-15)16-11-7-4-8-12-16/h3-12,17H,13-14H2,1-2H3	ZZVUWRFHKOJYTH-UHFFFAOYSA-N	C17H21NO	255.162
diphenylamine	Level 1 - Reference Standard	Diphenylamine	N-Phenylaniline	122-39-4	DTXSID4021975	N(C1=CC=CC=C1)C1=CC=CC=C1	InChI=1S/C12H11N/c1-3-7-11(8-4-1)13-12-9-5-2-6-10-12/h1-10,13H	DMBHHRLKUKUOEG-UHFFFAOYSA-N	C12H11N	169.089
emtricitabine	Level 1 - Reference Standard	Emtricitabine	4-Amino-5-fluoro-1-[(2R,5S)-2-(hydroxymethyl)-1,3-oxathiolan-5-yl]pyrimidin-2(1H)-one	143491-57-0	DTXSID0040129	NC1=NC(=O)N(C=C1F)[C@@H]1CS[C@H](CO)O1	InChI=1S/C8H10FN3O3S/c9-4-1-12(8(14)11-7(4)10)5-3-16-6(2-13)15-5/h1,5-6,13H,2-3H2,(H2,10,11,14)/t5-,6+/m0/s1	XQSPYNMVSIKCOC-NTSWFWBYSA-N	C8H10FN3O3S	247.043
ephedrine	Level 1 - Reference Standard	Ephedrine	(1R,2S)-2-(Methylamino)-1-phenylpropan-1-ol	299-42-3	DTXSID0022985	CN[C@@H](C)[C@H](O)C1=CC=CC=C1	InChI=1S/C10H15NO/c1-8(11-2)10(12)9-6-4-3-5-7-9/h3-8,10-12H,1-2H3/t8-,10-/m0/s1	KWGRBVOPPLSCSI-WPRPVWTQSA-N	C10H15NO	165.115
ephedrine-M:-H2O	NA - Fragment associated with ephedrine	-	-	-	NONE	-	-	-	-	-
eprosartan	Level 1 - Reference Standard	Eprosartan	4-({2-Butyl-5-[(1E)-2-carboxy-3-(thiophen-2-yl)prop-1-en-1-yl]-1H-imidazol-1-yl}methyl)benzoic acid	133040-01-4	DTXSID0022989	CCCCC1=NC=C(\C=C(/CC2=CC=CS2)C(O)=O)N1CC1=CC=C(C=C1)C(O)=O	InChI=1S/C23H24N2O4S/c1-2-3-6-21-24-14-19(12-18(23(28)29)13-20-5-4-11-30-20)25(21)15-16-7-9-17(10-8-16)22(26)27/h4-5,7-12,14H,2-3,6,13,15H2,1H3,(H,26,27)(H,28,29)/b18-12+	OROAFUQRIXKEMV-LDADJPATSA-N	C23H24N2O4S	424.146
ferulic acid	Level 1 - Reference Standard	Ferulic acid	3-(4-Hydroxy-3-methoxyphenyl)prop-2-enoic acid	1135-24-6	DTXSID5040673	COC1=C(O)C=CC(C=CC(O)=O)=C1	InChI=1S/C10H10O4/c1-14-9-6-7(2-4-8(9)11)3-5-10(12)13/h2-6,11H,1H3,(H,12,13)	KSEBMYQBYZTDHS-UHFFFAOYSA-N	C10H10O4	194.058
fexofenadine	Level 1 - Reference Standard	Fexofenadine	2-[4-(1-Hydroxy-4-{4-[hydroxy(diphenyl)methyl]piperidin-1-yl}butyl)phenyl]-2-methylpropanoic acid	83799-24-0	DTXSID00861411	CC(C)(C(O)=O)C1=CC=C(C=C1)C(O)CCCN1CCC(CC1)C(O)(C1=CC=CC=C1)C1=CC=CC=C1	InChI=1S/C32H39NO4/c1-31(2,30(35)36)25-17-15-24(16-18-25)29(34)14-9-21-33-22-19-28(20-23-33)32(37,26-10-5-3-6-11-26)27-12-7-4-8-13-27/h3-8,10-13,15-18,28-29,34,37H,9,14,19-23H2,1-2H3,(H,35,36)	RWTNPBWLLIMQHL-UHFFFAOYSA-N	C32H39NO4	501.288
fluconazole	Level 1 - Reference Standard	Fluconazole	2-(2,4-Difluorophenyl)-1,3-bis(1H-1,2,4-triazol-1-yl)propan-2-ol	86386-73-4	DTXSID3020627	OC(CN1C=NC=N1)(CN1C=NC=N1)C1=C(F)C=C(F)C=C1	InChI=1S/C13H12F2N6O/c14-10-1-2-11(12(15)3-10)13(22,4-20-8-16-6-18-20)5-21-9-17-7-19-21/h1-3,6-9,22H,4-5H2	RFHAOTPXVQNOHP-UHFFFAOYSA-N	C13H12F2N6O	306.104
heroin	Level 1 - Reference Standard	3,6-Diacetylmorphine	(5alpha,6alpha)-17-Methyl-7,8-didehydro-4,5-epoxymorphinan-3,6-diyl diacetate	561-27-3	DTXSID6046761	CN1CC[C@]23[C@H]4OC5=C(OC(C)=O)C=CC(C[C@@H]1[C@@H]2C=C[C@@H]4OC(C)=O)=C35	InChI=1S/C21H23NO5/c1-11(23)25-16-6-4-13-10-15-14-5-7-17(26-12(2)24)20-21(14,8-9-22(15)3)18(13)19(16)27-20/h4-7,14-15,17,20H,8-10H2,1-3H3/t14-,15+,17-,20-,21-/m0/s1	GVGLGOZIDCSQPN-PVHGPHFFSA-N	C21H23NO5	369.158
hordenine	Level 1 - Reference Standard	Hordenine	4-[2-(Dimethylamino)ethyl]phenol	539-15-1	DTXSID2046096	CN(C)CCC1=CC=C(O)C=C1	InChI=1S/C10H15NO/c1-11(2)8-7-9-3-5-10(12)6-4-9/h3-6,12H,7-8H2,1-2H3	KUBCEEMXQZUPDQ-UHFFFAOYSA-N	C10H15NO	165.115
hydroxy amitriptyline	Level 3 - Characterised by HRMS, position of hydroxy unknown	-	-	-	NONE	-	-	-	C20H23NO	293.178
hydroxy diphenhydramine	Level 3 - Characterised by HRMS, position of hydroxy unknown	-	-	-	NONE	-	-	-	C17H21NO2	271.157
hydroxy metoprolol	Level 3 - Characterised by HRMS, position of hydroxy unknown	-	-	-	NONE	-	-	-	C15H25NO4	283.178
hydroxy zolpidem	Level 3 - Characterised by HRMS, position of hydroxy unknown	-	-	-	NONE	-	-	-	C19H21N3O2	323.163
indoleacetamide	Level 1 - Reference Standard	Indoleacetamide	2-(1H-Indol-3-yl)acetamide	879-37-8	DTXSID60236686	NC(=O)CC1=CNC2=CC=CC=C12	InChI=1S/C10H10N2O/c11-10(13)5-7-6-12-9-4-2-1-3-8(7)9/h1-4,6,12H,5H2,(H2,11,13)	ZOAMBXDOGPRZLP-UHFFFAOYSA-N	C10H10N2O	174.079
ketamine	Level 1 - Reference Standard	Ketamine	2-(2-Chlorophenyl)-2-(methylamino)cyclohexan-1-one	6740-88-1	DTXSID8023187	CNC1(CCCCC1=O)C1=C(Cl)C=CC=C1	InChI=1S/C13H16ClNO/c1-15-13(9-5-4-8-12(13)16)10-6-2-3-7-11(10)14/h2-3,6-7,15H,4-5,8-9H2,1H3	YQEZLKZALYSWHR-UHFFFAOYSA-N	C13H16ClNO	237.092
lamotrigine	Level 1 - Reference Standard	Lamotrigine	6-(2,3-Dichlorophenyl)-1,2,4-triazine-3,5-diamine	84057-84-1	DTXSID2023195	NC1=NC(N)=C(N=N1)C1=CC=CC(Cl)=C1Cl	InChI=1S/C9H7Cl2N5/c10-5-3-1-2-4(6(5)11)7-8(12)14-9(13)16-15-7/h1-3H,(H4,12,13,14,16)	PYZRQGJRPPTADH-UHFFFAOYSA-N	C9H7Cl2N5	255.008
levamisole	Level 1 - Reference Standard	Levamisole	(6S)-6-Phenyl-2,3,5,6-tetrahydroimidazo[2,1-b][1,3]thiazole	14769-73-4	DTXSID4023206	C1CN2C[C@@H](N=C2S1)C1=CC=CC=C1	InChI=1S/C11H12N2S/c1-2-4-9(5-3-1)10-8-13-6-7-14-11(13)12-10/h1-5,10H,6-8H2/t10-/m1/s1	HLFSDGLLUJUHTE-SNVBAGLBSA-N	C11H12N2S	204.072
levetiracetam	Level 1 - Reference Standard	Levetiracetam	(2S)-2-(2-Oxopyrrolidin-1-yl)butanamide	102767-28-2	DTXSID9023207	CC[C@H](N1CCCC1=O)C(N)=O	InChI=1S/C8H14N2O2/c1-2-6(8(9)12)10-5-3-4-7(10)11/h6H,2-5H2,1H3,(H2,9,12)/t6-/m0/s1	HPHUVLMMVZITSG-LURJTMIESA-N	C8H14N2O2	170.106
metoprolol	Level 1 - Reference Standard	Metoprolol	1-[4-(2-Methoxyethyl)phenoxy]-3-[(propan-2-yl)amino]propan-2-ol	51384-51-1	DTXSID2023309	COCCC1=CC=C(OCC(O)CNC(C)C)C=C1	InChI=1S/C15H25NO3/c1-12(2)16-10-14(17)11-19-15-6-4-13(5-7-15)8-9-18-3/h4-7,12,14,16-17H,8-11H2,1-3H3	IUBSYMUCCVWXPE-UHFFFAOYSA-N	C15H25NO3	267.183
metronidazole	Level 1 - Reference Standard	Metronidazole	2-(2-Methyl-5-nitro-1H-imidazol-1-yl)ethan-1-ol	443-48-1	DTXSID2020892	CC1=NC=C(N1CCO)[N+]([O-])=O	InChI=1S/C6H9N3O3/c1-5-7-4-6(9(11)12)8(5)2-3-10/h4,10H,2-3H2,1H3	VAOCPAMSLUNLGC-UHFFFAOYSA-N	C6H9N3O3	171.064
milnacipran	Level 1 - Reference Standard	Milnacipran	(1R,2S)-2-(Aminomethyl)-N,N-diethyl-1-phenylcyclopropane-1-carboxamide	92623-85-3	DTXSID3048287	CCN(CC)C(=O)[C@@]1(C[C@@H]1CN)C1=CC=CC=C1	InChI=1S/C15H22N2O/c1-3-17(4-2)14(18)15(10-13(15)11-16)12-8-6-5-7-9-12/h5-9,13H,3-4,10-11,16H2,1-2H3/t13-,15+/m1/s1	GJJFMKBJSRMPLA-HIFRSBDPSA-N	C15H22N2O	246.173
minoxidil	Level 1 - Reference Standard	Minoxidil	3-Oxo-6-(piperidin-1-yl)-3lambda~5~-pyrimidine-2,4-diamine	38304-91-5	DTXSID9040685	NC1=CC(=NC(N)=[N+]1[O-])N1CCCCC1	InChI=1S/C9H15N5O/c10-7-6-8(12-9(11)14(7)15)13-4-2-1-3-5-13/h6H,1-5,10H2,(H2,11,12)	ZFMITUMMTDLWHR-UHFFFAOYSA-N	C9H15N5O	209.128
mycophenolic acid	Level 1 - Reference Standard	Mycophenolic acid	(4E)-6-(4-Hydroxy-6-methoxy-7-methyl-3-oxo-1,3-dihydro-2-benzofuran-5-yl)-4-methylhex-4-enoic acid	24280-93-1	DTXSID4041070	COC1=C(C)C2=C(C(=O)OC2)C(O)=C1C\C=C(/C)CCC(O)=O	InChI=1S/C17H20O6/c1-9(5-7-13(18)19)4-6-11-15(20)14-12(8-23-17(14)21)10(2)16(11)22-3/h4,20H,5-8H2,1-3H3,(H,18,19)/b9-4+	HPNSFSBZBAHARI-RUDMXATFSA-N	C17H20O6	320.126
N,N-diethyl-3-methyl-benzamide	Level 1 - Reference Standard	DEET	N,N-Diethyl-3-methylbenzamide	134-62-3	DTXSID2021995	CCN(CC)C(=O)C1=CC=CC(C)=C1	InChI=1S/C12H17NO/c1-4-13(5-2)12(14)11-8-6-7-10(3)9-11/h6-9H,4-5H2,1-3H3	MMOXZBCLCQITDF-UHFFFAOYSA-N	C12H17NO	191.131
N,N-dimethyl-1-decanamine oxide	Level 1 - Reference Standard	N,N-Dimethyldecylamine oxide	N,N-Dimethyldecan-1-amine N-oxide	2605-79-0	DTXSID7042190	CCCCCCCCCC[N+](C)(C)[O-]	InChI=1S/C12H27NO/c1-4-5-6-7-8-9-10-11-12-13(2,3)14/h4-12H2,1-3H3	ZRKZFNZPJKEWPC-UHFFFAOYSA-N	C12H27NO	201.209
N,O-didesmethyl venlafaxine	Level 1 - Reference Standard	N,O-Didesmethylvenlafaxine	4-[1-(1-Hydroxycyclohexyl)-2-(methylamino)ethyl]phenol	135308-74-6	DTXSID10891441	CNCC(C1=CC=C(O)C=C1)C1(O)CCCCC1	InChI=1S/C15H23NO2/c1-16-11-14(12-5-7-13(17)8-6-12)15(18)9-3-2-4-10-15/h5-8,14,16-18H,2-4,9-11H2,1H3	MMSWXJSQCAEDLK-UHFFFAOYSA-N	C15H23NO2	249.173
N4-acetylsulfamethoxazole	Level 1 - Reference Standard	N-Acetyl sulfamethoxazole	N-{4-[(5-Methyl-1,2-oxazol-3-yl)sulfamoyl]phenyl}acetamide	21312-10-7	DTXSID8049044	CC(=O)NC1=CC=C(C=C1)S(=O)(=O)NC1=NOC(C)=C1	InChI=1S/C12H13N3O4S/c1-8-7-12(14-19-8)15-20(17,18)11-5-3-10(4-6-11)13-9(2)16/h3-7H,1-2H3,(H,13,16)(H,14,15)	GXPIUNZCALHVBA-UHFFFAOYSA-N	C12H13N3O4S	295.063
N-demethyl venlafaxine	Level 1 - Reference Standard	N-Desmethyl Venlafaxine	1-[1-(4-Methoxyphenyl)-2-(methylamino)ethyl]cyclohexan-1-ol	149289-30-5	DTXSID20881050	CNCC(C1=CC=C(OC)C=C1)C1(O)CCCCC1	InChI=1S/C16H25NO2/c1-17-12-15(16(18)10-4-3-5-11-16)13-6-8-14(19-2)9-7-13/h6-9,15,17-18H,3-5,10-12H2,1-2H3	MKAFOJAJJMUXLW-UHFFFAOYSA-N	C16H25NO2	263.189
N-didesmethyl venlafaxine	Level 1 - Reference Standard	N,N-Didesvenlafaxine	1-[2-Amino-1-(4-methoxyphenyl)ethyl]cyclohexanol	93413-77-5	DTXSID50891440	COC1=CC=C(C=C1)C(CN)C1(O)CCCCC1	InChI=1S/C15H23NO2/c1-18-13-7-5-12(6-8-13)14(11-16)15(17)9-3-2-4-10-15/h5-8,14,17H,2-4,9-11,16H2,1H3	SUQHIQRIIBKNOR-UHFFFAOYSA-N	C15H23NO2	249.173
N-lauroylsarcosine	Level 1 - Reference Standard	N-Dodecanoyl-N-methylglycine	N-Dodecanoyl-N-methylglycine	97-78-9	DTXSID7042011	CCCCCCCCCCCC(=O)N(C)CC(O)=O	InChI=1S/C15H29NO3/c1-3-4-5-6-7-8-9-10-11-12-14(17)16(2)13-15(18)19/h3-13H2,1-2H3,(H,18,19)	BACYUWVYYTXETD-UHFFFAOYSA-N	C15H29NO3	271.215
norhydrocodone	Level 1 - Reference Standard	Morphinan-6-one, 4,5-epoxy-3-methoxy-, (5alpha)-	(5beta)-3-Methoxy-4,5-epoxymorphinan-6-one	5083-62-5	DTXSID70198862	COC1=C2O[C@@H]3C(=O)CC[C@H]4[C@H]5CC(C=C1)=C2[C@@]34CCN5	InChI=1S/C17H19NO3/c1-20-13-5-2-9-8-11-10-3-4-12(19)16-17(10,6-7-18-11)14(9)15(13)21-16/h2,5,10-11,16,18H,3-4,6-8H2,1H3/t10-,11+,16+,17-/m0/s1	JGORUXKMRLIJSV-LJYYHZRSSA-N	C17H19NO3	285.136
normorphine	Level 1 - Reference Standard	Normorphine	(5alpha,6alpha,9alpha)-7,8-Didehydro-4,5-epoxymorphinan-3,6-diol	466-97-7	DTXSID1049019	O[C@H]1C=C[C@H]2[C@@H]3CC4=C5C(O[C@@H]1[C@@]25CCN3)=C(O)C=C4	InChI=1S/C16H17NO3/c18-11-3-1-8-7-10-9-2-4-12(19)15-16(9,5-6-17-10)13(8)14(11)20-15/h1-4,9-10,12,15,17-19H,5-7H2/t9-,10-,12-,15-,16-/m0/s1	ONBWJWYUHXVEJS-WYCAWQEYSA-N	C16H17NO3	271.121
O-desmethyl venlafaxine	Level 1 - Reference Standard	O-Desmethyl Venlafaxine	4-[2-(Dimethylamino)-1-(1-hydroxycyclohexyl)ethyl]phenol	93413-62-8	DTXSID40869118	CN(C)CC(C1=CC=C(O)C=C1)C1(O)CCCCC1	InChI=1S/C16H25NO2/c1-17(2)12-15(13-6-8-14(18)9-7-13)16(19)10-4-3-5-11-16/h6-9,15,18-19H,3-5,10-12H2,1-2H3	KYYIDSXMWOZKMP-UHFFFAOYSA-N	C16H25NO2	263.189
ofloxacin	Level 1 - Reference Standard	Ofloxacin	9-Fluoro-3-methyl-10-(4-methylpiperazin-1-yl)-7-oxo-2,3-dihydro-7H-[1,4]oxazino[2,3,4-ij]quinoline-6-carboxylic acid	82419-36-1	DTXSID3041085	CC1COC2=C(N3CCN(C)CC3)C(F)=CC3=C2N1C=C(C(O)=O)C3=O	InChI=1S/C18H20FN3O4/c1-10-9-26-17-14-11(16(23)12(18(24)25)8-22(10)14)7-13(19)15(17)21-5-3-20(2)4-6-21/h7-8,10H,3-6,9H2,1-2H3,(H,24,25)	GSDSWSVVBLHKDQ-UHFFFAOYSA-N	C18H20FN3O4	361.144
olmesartan	Level 1 - Reference Standard	Olmesartan	4-(2-Hydroxypropan-2-yl)-2-propyl-1-{[2'-(1H-tetrazol-5-yl)[1,1'-biphenyl]-4-yl]methyl}-1H-imidazole-5-carboxylic acid	144689-24-7	DTXSID2040571	CCCC1=NC(=C(N1CC1=CC=C(C=C1)C1=C(C=CC=C1)C1=NN=NN1)C(O)=O)C(C)(C)O	InChI=1S/C24H26N6O3/c1-4-7-19-25-21(24(2,3)33)20(23(31)32)30(19)14-15-10-12-16(13-11-15)17-8-5-6-9-18(17)22-26-28-29-27-22/h5-6,8-13,33H,4,7,14H2,1-3H3,(H,31,32)(H,26,27,28,29)	VTRAEEWXHOVJFV-UHFFFAOYSA-N	C24H26N6O3	446.207
oxcarbazepine	Level 1 - Reference Standard	Oxcarbazepine	10-Oxo-10,11-dihydro-5H-dibenzo[b,f]azepine-5-carboxamide	28721-07-5	DTXSID0045703	NC(=O)N1C2=CC=CC=C2CC(=O)C2=CC=CC=C12	InChI=1S/C15H12N2O2/c16-15(19)17-12-7-3-1-5-10(12)9-14(18)11-6-2-4-8-13(11)17/h1-8H,9H2,(H2,16,19)	CTRLABGOLIVAIY-UHFFFAOYSA-N	C15H12N2O2	252.09
phenacetin	Level 1 - Reference Standard	Phenacetin	N-(4-Ethoxyphenyl)acetamide	62-44-2	DTXSID1021116	CCOC1=CC=C(NC(C)=O)C=C1	InChI=1S/C10H13NO2/c1-3-13-10-6-4-9(5-7-10)11-8(2)12/h4-7H,3H2,1-2H3,(H,11,12)	CPJSUEIXXCENMM-UHFFFAOYSA-N	C10H13NO2	179.095
pheniramine	Level 1 - Reference Standard	Pheniramine	N,N-Dimethyl-3-phenyl-3-(pyridin-2-yl)propan-1-amine	86-21-5	DTXSID0023454	CN(C)CCC(C1=CC=CC=C1)C1=NC=CC=C1	InChI=1S/C16H20N2/c1-18(2)13-11-15(14-8-4-3-5-9-14)16-10-6-7-12-17-16/h3-10,12,15H,11,13H2,1-2H3	IJHNSHDBIRRJRN-UHFFFAOYSA-N	C16H20N2	240.163
phthalimide	Level 1 - Reference Standard	Phthalimide	1H-Isoindole-1,3(2H)-dione	85-41-6	DTXSID3026514	O=C1NC(=O)C2=C1C=CC=C2	InChI=1S/C8H5NO2/c10-7-5-3-1-2-4-6(5)8(11)9-7/h1-4H,(H,9,10,11)	XKJCHHZQLQNZHY-UHFFFAOYSA-N	C8H5NO2	147.032
propyphenazone	Level 1 - Reference Standard	Propyphenazone	1,5-Dimethyl-2-phenyl-4-(propan-2-yl)-1,2-dihydro-3H-pyrazol-3-one	479-92-5	DTXSID6023529	CC(C)C1=C(C)N(C)N(C1=O)C1=CC=CC=C1	InChI=1S/C14H18N2O/c1-10(2)13-11(3)15(4)16(14(13)17)12-8-6-5-7-9-12/h5-10H,1-4H3	PXWLVJLKJGVOKE-UHFFFAOYSA-N	C14H18N2O	230.142
pyrantel	Level 1 - Reference Standard	Pyrantel	1-Methyl-2-[(E)-2-(thiophen-2-yl)ethenyl]-1,4,5,6-tetrahydropyrimidine	15686-83-6	DTXSID5023538	CN1CCCN=C1\C=C\C1=CC=CS1	InChI=1S/C11H14N2S/c1-13-8-3-7-12-11(13)6-5-10-4-2-9-14-10/h2,4-6,9H,3,7-8H2,1H3/b6-5+	YSAUAVHXTIETRK-AATRIKPKSA-N	C11H14N2S	206.088
pyridoxine	Level 1 - Reference Standard	Pyridoxine	4,5-Bis(hydroxymethyl)-2-methylpyridin-3-ol	65-23-6	DTXSID4023541	CC1=C(O)C(CO)=C(CO)C=N1	InChI=1S/C8H11NO3/c1-5-8(12)7(4-11)6(3-10)2-9-5/h2,10-12H,3-4H2,1H3	LXNHXLLTXMVWPM-UHFFFAOYSA-N	C8H11NO3	169.074
quinidine	Level 1 - Reference Standard	Quinidine	(9S)-6'-Methoxycinchonan-9-ol	56-54-2	DTXSID4023549	[H][C@@]1(C[C@@H]2CC[N@]1C[C@@H]2C=C)[C@@H](O)C1=CC=NC2=CC=C(OC)C=C12	InChI=1S/C20H24N2O2/c1-3-13-12-22-9-7-14(13)10-19(22)20(23)16-6-8-21-18-5-4-15(24-2)11-17(16)18/h3-6,8,11,13-14,19-20,23H,1,7,9-10,12H2,2H3/t13-,14-,19+,20-/m0/s1	LOUPRKONTZGTKE-LHHVKLHASA-N	C20H24N2O2	324.184
ranitidine	Level 1 - Reference Standard	Ranitidine	N~1~-{2-[({5-[(Dimethylamino)methyl]furan-2-yl}methyl)sulfanyl]ethyl}-N'~1~-methyl-2-nitroethene-1,1-diamine	66357-35-5	DTXSID8045191	CNC(NCCSCC1=CC=C(CN(C)C)O1)=C[N+]([O-])=O	InChI=1S/C13H22N4O3S/c1-14-13(9-17(18)19)15-6-7-21-10-12-5-4-11(20-12)8-16(2)3/h4-5,9,14-15H,6-8,10H2,1-3H3	VMXUWOKSQNHOCA-UHFFFAOYSA-N	C13H22N4O3S	314.141
ritalinic acid	Level 1 - Reference Standard	Ritalinic acid	Phenyl(piperidin-2-yl)acetic acid	19395-41-6	DTXSID20864888	OC(=O)C(C1CCCCN1)C1=CC=CC=C1	InChI=1S/C13H17NO2/c15-13(16)12(10-6-2-1-3-7-10)11-8-4-5-9-14-11/h1-3,6-7,11-12,14H,4-5,8-9H2,(H,15,16)	INGSNVSERUZOAK-UHFFFAOYSA-N	C13H17NO2	219.126
salicylic acid	Level 1 - Reference Standard	Salicylic acid	2-Hydroxybenzoic acid	69-72-7	DTXSID7026368	OC(=O)C1=C(O)C=CC=C1	InChI=1S/C7H6O3/c8-6-4-2-1-3-5(6)7(9)10/h1-4,8H,(H,9,10)	YGSDEFSMJLZEOE-UHFFFAOYSA-N	C7H6O3	138.032
sitagliptin	Level 1 - Reference Standard	Sitagliptin	(3R)-3-Amino-1-[3-(trifluoromethyl)-5,6-dihydro[1,2,4]triazolo[4,3-a]pyrazin-7(8H)-yl]-4-(2,4,5-trifluorophenyl)butan-1-one	486460-32-6	DTXSID70197572	N[C@@H](CC(=O)N1CCN2C(C1)=NN=C2C(F)(F)F)CC1=CC(F)=C(F)C=C1F	InChI=1S/C16H15F6N5O/c17-10-6-12(19)11(18)4-8(10)3-9(23)5-14(28)26-1-2-27-13(7-26)24-25-15(27)16(20,21)22/h4,6,9H,1-3,5,7,23H2/t9-/m1/s1	MFFMDFFZMYYVKS-SECBINFHSA-N	C16H15F6N5O	407.118
sotalol	Level 1 - Reference Standard	Sotalol	N-(4-{1-Hydroxy-2-[(propan-2-yl)amino]ethyl}phenyl)methanesulfonamide	3930-20-9	DTXSID0023589	CC(C)NCC(O)C1=CC=C(NS(C)(=O)=O)C=C1	InChI=1S/C12H20N2O3S/c1-9(2)13-8-12(15)10-4-6-11(7-5-10)14-18(3,16)17/h4-7,9,12-15H,8H2,1-3H3	ZBMZVLHSJCTVON-UHFFFAOYSA-N	C12H20N2O3S	272.119
sulpiride	Level 1 - Reference Standard	Sulpiride	N-[(1-Ethylpyrrolidin-2-yl)methyl]-2-methoxy-5-sulfamoylbenzamide	15676-16-1	DTXSID1042574	CCN1CCCC1CNC(=O)C1=C(OC)C=CC(=C1)S(N)(=O)=O	InChI=1S/C15H23N3O4S/c1-3-18-8-4-5-11(18)10-17-15(19)13-9-12(23(16,20)21)6-7-14(13)22-2/h6-7,9,11H,3-5,8,10H2,1-2H3,(H,17,19)(H2,16,20,21)	BGRJTUBHPOOWDU-UHFFFAOYSA-N	C15H23N3O4S	341.141
telmisartan	Level 1 - Reference Standard	Telmisartan	4'-[(1,7'-Dimethyl-2'-propyl-1H,3'H-[2,5'-bibenzimidazol]-3'-yl)methyl][1,1'-biphenyl]-2-carboxylic acid	144701-48-4	DTXSID8023636	CCCC1=NC2=C(C=C(C=C2C)C2=NC3=CC=CC=C3N2C)N1CC1=CC=C(C=C1)C1=CC=CC=C1C(O)=O	InChI=1S/C33H30N4O2/c1-4-9-30-35-31-21(2)18-24(32-34-27-12-7-8-13-28(27)36(32)3)19-29(31)37(30)20-22-14-16-23(17-15-22)25-10-5-6-11-26(25)33(38)39/h5-8,10-19H,4,9,20H2,1-3H3,(H,38,39)	RMMXLENWKUUMAY-UHFFFAOYSA-N	C33H30N4O2	514.237
terbutryne	Level 1 - Reference Standard	Terbutryn	N~2~-tert-Butyl-N~4~-ethyl-6-(methylsulfanyl)-1,3,5-triazine-2,4-diamine	886-50-0	DTXSID3024318	CCNC1=NC(SC)=NC(NC(C)(C)C)=N1	InChI=1S/C10H19N5S/c1-6-11-7-12-8(15-10(2,3)4)14-9(13-7)16-5/h6H2,1-5H3,(H2,11,12,13,14,15)	IROINLKCQGIITA-UHFFFAOYSA-N	C10H19N5S	241.136
tetrabutylammonium	Level 1 - Reference Standard	Tetrabutylammonium	N,N,N-Tributylbutan-1-aminium	10549-76-5	DTXSID3045011	CCCC[N+](CCCC)(CCCC)CCCC	InChI=1S/C16H36N/c1-5-9-13-17(14-10-6-2,15-11-7-3)16-12-8-4/h5-16H2,1-4H3/q+1	DZLFLBLQUQXARW-UHFFFAOYSA-N	C16H36N	242.284
theophyline	Level 1 - Reference Standard	Theophylline	1,3-Dimethyl-3,7-dihydro-1H-purine-2,6-dione	58-55-9	DTXSID5021336	CN1C2=C(NC=N2)C(=O)N(C)C1=O	InChI=1S/C7H8N4O2/c1-10-5-4(8-3-9-5)6(12)11(2)7(10)13/h3H,1-2H3,(H,8,9)	ZFXYFBGIUFBOJW-UHFFFAOYSA-N	C7H8N4O2	180.065
tiapride	Level 1 - Reference Standard	Tiapride	N-[2-(Diethylamino)ethyl]-5-(methanesulfonyl)-2-methoxybenzamide	51012-32-9	DTXSID0023664	CCN(CC)CCNC(=O)C1=CC(=CC=C1OC)S(C)(=O)=O	InChI=1S/C15H24N2O4S/c1-5-17(6-2)10-9-16-15(18)13-11-12(22(4,19)20)7-8-14(13)21-3/h7-8,11H,5-6,9-10H2,1-4H3,(H,16,18)	JTVPZMFULRWINT-UHFFFAOYSA-N	C15H24N2O4S	328.146
tranylcypromine	Level 1 - Reference Standard	Tranylcypromine	(1R,2S)-2-Phenylcyclopropan-1-amine	155-09-9	DTXSID2023694	N[C@@H]1C[C@H]1C1=CC=CC=C1	InChI=1S/C9H11N/c10-9-6-8(9)7-4-2-1-3-5-7/h1-5,8-9H,6,10H2/t8-,9+/m0/s1	AELCINSCMGFISI-DTWKUNHWSA-N	C9H11N	133.089
trimethoprim	Level 1 - Reference Standard	Trimethoprim	5-[(3,4,5-Trimethoxyphenyl)methyl]pyrimidine-2,4-diamine	738-70-5	DTXSID3023712	COC1=CC(CC2=CN=C(N)N=C2N)=CC(OC)=C1OC	InChI=1S/C14H18N4O3/c1-19-10-5-8(6-11(20-2)12(10)21-3)4-9-7-17-14(16)18-13(9)15/h5-7H,4H2,1-3H3,(H4,15,16,17,18)	IEDVJHCEMCRBQM-UHFFFAOYSA-N	C14H18N4O3	290.138
trospium	Level 1 - Reference Standard	Trospium	-	47608-32-2	DTXSID6048337	OC(C(=O)O[C@@H]1C[C@@H]2CC[C@H](C1)[N+]21CCCC1)(C1=CC=CC=C1)C1=CC=CC=C1	InChI=1S/C25H30NO3/c27-24(25(28,19-9-3-1-4-10-19)20-11-5-2-6-12-20)29-23-17-21-13-14-22(18-23)26(21)15-7-8-16-26/h1-6,9-12,21-23,28H,7-8,13-18H2/q+1/t21-,22+,23+	OYYDSUSKLWTMMQ-JKHIJQBDSA-N	C25H30NO3	392.222
tryptamine	Level 1 - Reference Standard	Tryptamine	2-(1H-Indol-3-yl)ethan-1-amine	61-54-1	DTXSID2075340	NCCC1=CNC2=CC=CC=C12	InChI=1S/C10H12N2/c11-6-5-8-7-12-10-4-2-1-3-9(8)10/h1-4,7,12H,5-6,11H2	APJYDQYYACXCRM-UHFFFAOYSA-N	C10H12N2	160.1
tyramine	Level 1 - Reference Standard	Tyramine	4-(2-Aminoethyl)phenol	51-67-2	DTXSID2043874	NCCC1=CC=C(O)C=C1	InChI=1S/C8H11NO/c9-6-5-7-1-3-8(10)4-2-7/h1-4,10H,5-6,9H2	DZGWFCGJZKJUFP-UHFFFAOYSA-N	C8H11NO	137.084
valsartan	Level 1 - Reference Standard	Valsartan	N-Pentanoyl-N-{[2'-(1H-tetrazol-5-yl)[1,1'-biphenyl]-4-yl]methyl}-D-valine	137862-53-4	DTXSID6023735	CCCCC(=O)N(CC1=CC=C(C=C1)C1=CC=CC=C1C1=NN=NN1)[C@H](C(C)C)C(O)=O	InChI=1S/C24H29N5O3/c1-4-5-10-21(30)29(22(16(2)3)24(31)32)15-17-11-13-18(14-12-17)19-8-6-7-9-20(19)23-25-27-28-26-23/h6-9,11-14,16,22H,4-5,10,15H2,1-3H3,(H,31,32)(H,25,26,27,28)/t22-/m1/s1	ACWBQPMHZXGDFX-JOCHJYFZSA-N	C24H29N5O3	435.227
venlafaxine	Level 1 - Reference Standard	Venlafaxine	1-[2-(Dimethylamino)-1-(4-methoxyphenyl)ethyl]cyclohexan-1-ol	93413-69-5	DTXSID6023737	COC1=CC=C(C=C1)C(CN(C)C)C1(O)CCCCC1	InChI=1S/C17H27NO2/c1-18(2)13-16(17(19)11-5-4-6-12-17)14-7-9-15(20-3)10-8-14/h7-10,16,19H,4-6,11-13H2,1-3H3	PNVNVHUZROJLTJ-UHFFFAOYSA-N	C17H27NO2	277.204
vildagliptin	Level 1 - Reference Standard	Vildagliptin	(2S)-1-[N-(3-Hydroxyadamantan-1-yl)glycyl]pyrrolidine-2-carbonitrile	274901-16-5	DTXSID80881091	[H][C@]1(CCCN1C(=O)CNC12CC3CC(CC(O)(C3)C1)C2)C#N	InChI=1S/C17H25N3O2/c18-9-14-2-1-3-20(14)15(21)10-19-16-5-12-4-13(6-16)8-17(22,7-12)11-16/h12-14,19,22H,1-8,10-11H2/t12?,13?,14-,16?,17?/m0/s1	SYOKIDBDQMKNDQ-XWTIBIIYSA-N	C17H25N3O2	303.195
2,6-dichlorobenzamide	Level 1 - Reference Standard	2,6-Dichlorobenzamide	2,6-Dichlorobenzamide	2008-58-4	DTXSID7022170	NC(=O)C1=C(Cl)C=CC=C1Cl	InChI=1S/C7H5Cl2NO/c8-4-2-1-3-5(9)6(4)7(10)11/h1-3H,(H2,10,11)	JHSPCUHPSIUQRB-UHFFFAOYSA-N	C7H5Cl2NO	188.975
2-aminobenzimidazole	Level 1 - Reference Standard	2-Aminobenzimidazole	1H-Benzimidazol-2-amine	934-32-7	DTXSID1024465	NC1=NC2=CC=CC=C2N1	InChI=1S/C7H7N3/c8-7-9-5-3-1-2-4-6(5)10-7/h1-4H,(H3,8,9,10)	JWYUFVNJZUSCSM-UHFFFAOYSA-N	C7H7N3	133.064
2-isopropyl-4-methyl-6-hydroxypyrimidine	Level 1 - Reference Standard	2-Isopropyl-6-methyl-4-pyrimidone	6-Methyl-2-(propan-2-yl)pyrimidin-4(1H)-one	2814-20-2	DTXSID1027502	CC(C)C1=NC(=O)C=C(C)N1	InChI=1S/C8H12N2O/c1-5(2)8-9-6(3)4-7(11)10-8/h4-5H,1-3H3,(H,9,10,11)	AJPIUNPJBFBUKK-UHFFFAOYSA-N	C8H12N2O	152.095
4-isopropylaniline	Level 1 - Reference Standard	Cumidine	4-(Propan-2-yl)aniline	99-88-7	DTXSID20243932	CC(C)C1=CC=C(N)C=C1	InChI=1S/C9H13N/c1-7(2)8-3-5-9(10)6-4-8/h3-7H,10H2,1-2H3	LRTFPLFDLJYEKT-UHFFFAOYSA-N	C9H13N	135.105
atrazine	Level 1 - Reference Standard	Atrazine	6-Chloro-N~2~-ethyl-N~4~-(propan-2-yl)-1,3,5-triazine-2,4-diamine	1912-24-9	DTXSID9020112	CCNC1=NC(NC(C)C)=NC(Cl)=N1	InChI=1S/C8H14ClN5/c1-4-10-7-12-6(9)13-8(14-7)11-5(2)3/h5H,4H2,1-3H3,(H2,10,11,12,13,14)	MXWJVTOOROXGIU-UHFFFAOYSA-N	C8H14ClN5	215.094
atrazine-desethyl	Level 1 - Reference Standard	Deethylatrazine	6-Chloro-N~2~-(propan-2-yl)-1,3,5-triazine-2,4-diamine	6190-65-4	DTXSID5037494	CC(C)NC1=NC(Cl)=NC(N)=N1	InChI=1S/C6H10ClN5/c1-3(2)9-6-11-4(7)10-5(8)12-6/h3H,1-2H3,(H3,8,9,10,11,12)	DFWFIQKMSFGDCQ-UHFFFAOYSA-N	C6H10ClN5	187.062
benzophenone-3	Level 1 - Reference Standard	2-Hydroxy-4-methoxybenzophenone	(2-Hydroxy-4-methoxyphenyl)(phenyl)methanone	131-57-7	DTXSID3022405	COC1=CC=C(C(=O)C2=CC=CC=C2)C(O)=C1	InChI=1S/C14H12O3/c1-17-11-7-8-12(13(15)9-11)14(16)10-5-3-2-4-6-10/h2-9,15H,1H3	DXGLGDHPHMLXJC-UHFFFAOYSA-N	C14H12O3	228.079
bezafibrate	Level 1 - Reference Standard	Bezafibrate	2-{4-[2-(4-Chlorobenzamido)ethyl]phenoxy}-2-methylpropanoic acid	41859-67-0	DTXSID3029869	CC(C)(OC1=CC=C(CCNC(=O)C2=CC=C(Cl)C=C2)C=C1)C(O)=O	InChI=1S/C19H20ClNO4/c1-19(2,18(23)24)25-16-9-3-13(4-10-16)11-12-21-17(22)14-5-7-15(20)8-6-14/h3-10H,11-12H2,1-2H3,(H,21,22)(H,23,24)	IIBYAHWJQTYFKB-UHFFFAOYSA-N	C19H20ClNO4	361.108
carbendazim	Level 1 - Reference Standard	Carbendazim	Methyl 1H-benzimidazol-2-ylcarbamate	10605-21-7	DTXSID4024729	COC(=O)NC1=NC2=CC=CC=C2N1	InChI=1S/C9H9N3O2/c1-14-9(13)12-8-10-6-4-2-3-5-7(6)11-8/h2-5H,1H3,(H2,10,11,12,13)	TWFZGCMQGLPBSX-UHFFFAOYSA-N	C9H9N3O2	191.069
chloridazone-methyl-desphenyl	Level 1 - Reference Standard	Methyldesphenylchloridazon	5-Amino-4-chloro-2-methyl-3(2H)-pyridazinone	17254-80-7	DTXSID80891453	CN1N=CC(N)=C(Cl)C1=O	InChI=1S/C5H6ClN3O/c1-9-5(10)4(6)3(7)2-8-9/h2H,7H2,1H3	XNSGCNYTNLWRKM-UHFFFAOYSA-N	C5H6ClN3O	159.02
clarithromycin	Level 1 - Reference Standard	Clarithromycin	-	81103-11-9	DTXSID3022829	CC[C@H]1OC(=O)[C@H](C)[C@@H](O[C@H]2C[C@@](C)(OC)[C@@H](O)[C@H](C)O2)[C@H](C)[C@@H](O[C@@H]2O[C@H](C)C[C@@H]([C@H]2O)N(C)C)[C@@](C)(C[C@@H](C)C(=O)[C@H](C)[C@@H](O)[C@]1(C)O)OC	InChI=1S/C38H69NO13/c1-15-26-38(10,45)31(42)21(4)28(40)19(2)17-37(9,47-14)33(52-35-29(41)25(39(11)12)16-20(3)48-35)22(5)30(23(6)34(44)50-26)51-27-18-36(8,46-13)32(43)24(7)49-27/h19-27,29-33,35,41-43,45H,15-18H2,1-14H3/t19-,20-,21+,22+,23-,24+,25+,26-,27+,29-,30+,31-,32+,33-,35+,36-,37-,38-/m1/s1	AGOYDEPGAOXOCK-KCBOHYOISA-N	C38H69NO13	747.477
diazinon	Level 1 - Reference Standard	Diazinon	O,O-Diethyl O-[6-methyl-2-(propan-2-yl)pyrimidin-4-yl] phosphorothioate	333-41-5	DTXSID9020407	CCOP(=S)(OCC)OC1=NC(=NC(C)=C1)C(C)C	InChI=1S/C12H21N2O3PS/c1-6-15-18(19,16-7-2)17-11-8-10(5)13-12(14-11)9(3)4/h8-9H,6-7H2,1-5H3	FHIVAFMUCKRCQO-UHFFFAOYSA-N	C12H21N2O3PS	304.101
erythromycin	Level 1 - Reference Standard	Erythromycin	-	114-07-8	DTXSID4022991	CC[C@H]1OC(=O)[C@H](C)[C@@H](O[C@H]2C[C@@](C)(OC)[C@@H](O)[C@H](C)O2)[C@H](C)[C@@H](O[C@@H]2O[C@H](C)C[C@@H]([C@H]2O)N(C)C)[C@](C)(O)C[C@@H](C)C(=O)[C@H](C)[C@@H](O)[C@]1(C)O	InChI=1S/C37H67NO13/c1-14-25-37(10,45)30(41)20(4)27(39)18(2)16-35(8,44)32(51-34-28(40)24(38(11)12)15-19(3)47-34)21(5)29(22(6)33(43)49-25)50-26-17-36(9,46-13)31(42)23(7)48-26/h18-26,28-32,34,40-42,44-45H,14-17H2,1-13H3/t18-,19-,20+,21+,22-,23+,24+,25-,26+,28-,29+,30-,31+,32-,34+,35-,36-,37-/m1/s1	ULGZDMOVFRHVEP-RWJQBGPGSA-N	C37H67NO13	733.461
galaxolidone	Level 1 - Reference Standard	Galaxolidone	4,6,6,7,8,8-Hexamethyl-4,6,7,8-tetrahydroindeno[5,6-c]pyran-1(3H)-one	507442-49-1	DTXSID10881089	CC1C(C)(C)C2=C(C=C3C(=O)OCC(C)C3=C2)C1(C)C	InChI=1S/C18H24O2/c1-10-9-20-16(19)13-8-15-14(7-12(10)13)17(3,4)11(2)18(15,5)6/h7-8,10-11H,9H2,1-6H3	PGMHPYRIXBRRQD-UHFFFAOYSA-N	C18H24O2	272.178
indomethacin	Level 1 - Reference Standard	Indomethacin	[1-(4-Chlorobenzoyl)-5-methoxy-2-methyl-1H-indol-3-yl]acetic acid	53-86-1	DTXSID9020740	COC1=CC2=C(C=C1)N(C(=O)C1=CC=C(Cl)C=C1)C(C)=C2CC(O)=O	InChI=1S/C19H16ClNO4/c1-11-15(10-18(22)23)16-9-14(25-2)7-8-17(16)21(11)19(24)12-3-5-13(20)6-4-12/h3-9H,10H2,1-2H3,(H,22,23)	CGIGDMFJXJATDK-UHFFFAOYSA-N	C19H16ClNO4	357.077
iomeprol	Level 1 - Reference Standard	Iomeprol	N~1~,N~3~-Bis(2,3-dihydroxypropyl)-5-[(hydroxyacetyl)(methyl)amino]-2,4,6-triiodobenzene-1,3-dicarboxamide	78649-41-9	DTXSID1049061	CN(C(=O)CO)C1=C(I)C(C(=O)NCC(O)CO)=C(I)C(C(=O)NCC(O)CO)=C1I	InChI=1S/C17H22I3N3O8/c1-23(9(29)6-26)15-13(19)10(16(30)21-2-7(27)4-24)12(18)11(14(15)20)17(31)22-3-8(28)5-25/h7-8,24-28H,2-6H2,1H3,(H,21,30)(H,22,31)	NJKDOADNQSYQEV-UHFFFAOYSA-N	C17H22I3N3O8	776.854
iopromide	Level 1 - Reference Standard	Iopromide	N~1~,N~3~-Bis(2,3-dihydroxypropyl)-2,4,6-triiodo-5-(2-methoxyacetamido)-N~1~-methylbenzene-1,3-dicarboxamide	73334-07-3	DTXSID0023163	COCC(=O)NC1=C(I)C(C(=O)NCC(O)CO)=C(I)C(C(=O)N(C)CC(O)CO)=C1I	InChI=1S/C18H24I3N3O8/c1-24(4-9(28)6-26)18(31)12-13(19)11(17(30)22-3-8(27)5-25)14(20)16(15(12)21)23-10(29)7-32-2/h8-9,25-28H,3-7H2,1-2H3,(H,22,30)(H,23,29)	DGAIEPBNLOQYER-UHFFFAOYSA-N	C18H24I3N3O8	790.87
ketoprofen	Level 1 - Reference Standard	Ketoprofen	2-(3-Benzoylphenyl)propanoic acid	22071-15-4	DTXSID6020771	CC(C(O)=O)C1=CC(=CC=C1)C(=O)C1=CC=CC=C1	InChI=1S/C16H14O3/c1-11(16(18)19)13-8-5-9-14(10-13)15(17)12-6-3-2-4-7-12/h2-11H,1H3,(H,18,19)	DKYWVDODHFEZIM-UHFFFAOYSA-N	C16H14O3	254.094
lidocaine	Level 1 - Reference Standard	Lidocaine	N-(2,6-Dimethylphenyl)-N~2~,N~2~-diethylglycinamide	137-58-6	DTXSID1045166	CCN(CC)CC(=O)NC1=C(C)C=CC=C1C	InChI=1S/C14H22N2O/c1-5-16(6-2)10-13(17)15-14-11(3)8-7-9-12(14)4/h7-9H,5-6,10H2,1-4H3,(H,15,17)	NNJVILVZKWQKPM-UHFFFAOYSA-N	C14H22N2O	234.173
mefenamic acid	Level 1 - Reference Standard	Mefenamic acid	2-(2,3-Dimethylanilino)benzoic acid	61-68-7	DTXSID5023243	CC1=C(C)C(NC2=C(C=CC=C2)C(O)=O)=CC=C1	InChI=1S/C15H15NO2/c1-10-6-5-9-13(11(10)2)16-14-8-4-3-7-12(14)15(17)18/h3-9,16H,1-2H3,(H,17,18)	HYYBABOKPJLUIN-UHFFFAOYSA-N	C15H15NO2	241.11
metalaxyl	Level 1 - Reference Standard	Metalaxyl	Methyl N-(2,6-dimethylphenyl)-N-(methoxyacetyl)alaninate	57837-19-1	DTXSID6024175	COCC(=O)N(C(C)C(=O)OC)C1=C(C)C=CC=C1C	InChI=1S/C15H21NO4/c1-10-7-6-8-11(2)14(10)16(13(17)9-19-4)12(3)15(18)20-5/h6-8,12H,9H2,1-5H3	ZQEIXNIJLIKNTD-UHFFFAOYSA-N	C15H21NO4	279.147
metoclopramide	Level 1 - Reference Standard	Metoclopramide	4-Amino-5-chloro-N-[2-(diethylamino)ethyl]-2-methoxybenzamide	364-62-5	DTXSID6045169	CCN(CC)CCNC(=O)C1=CC(Cl)=C(N)C=C1OC	InChI=1S/C14H22ClN3O2/c1-4-18(5-2)7-6-17-14(19)10-8-11(15)12(16)9-13(10)20-3/h8-9H,4-7,16H2,1-3H3,(H,17,19)	TTWJBBZEZQICBI-UHFFFAOYSA-N	C14H22ClN3O2	299.14
metolachlor	Level 1 - Reference Standard	Metolachlor	2-Chloro-N-(2-ethyl-6-methylphenyl)-N-(1-methoxypropan-2-yl)acetamide	51218-45-2	DTXSID4022448	CCC1=C(N(C(C)COC)C(=O)CCl)C(C)=CC=C1	InChI=1S/C15H22ClNO2/c1-5-13-8-6-7-11(2)15(13)17(14(18)9-16)12(3)10-19-4/h6-8,12H,5,9-10H2,1-4H3	WVQBLGZPHOPPFO-UHFFFAOYSA-N	C15H22ClNO2	283.134
moclobemide	Level 1 - Reference Standard	Moclobemide	4-Chloro-N-[2-(morpholin-4-yl)ethyl]benzamide	71320-77-9	DTXSID9040554	ClC1=CC=C(C=C1)C(=O)NCCN1CCOCC1	InChI=1S/C13H17ClN2O2/c14-12-3-1-11(2-4-12)13(17)15-5-6-16-7-9-18-10-8-16/h1-4H,5-10H2,(H,15,17)	YHXISWVBGDMDLQ-UHFFFAOYSA-N	C13H17ClN2O2	268.098
N,O-didesmethylvenlafaxine	Level 1 - Reference Standard	N,O-Didesmethylvenlafaxine	4-[1-(1-Hydroxycyclohexyl)-2-(methylamino)ethyl]phenol	135308-74-6	DTXSID10891441	CNCC(C1=CC=C(O)C=C1)C1(O)CCCCC1	InChI=1S/C15H23NO2/c1-16-11-14(12-5-7-13(17)8-6-12)15(18)9-3-2-4-10-15/h5-8,14,16-18H,2-4,9-11H2,1H3	MMSWXJSQCAEDLK-UHFFFAOYSA-N	C15H23NO2	249.173
O-desmethyltramadol	Level 1 - Reference Standard	m-(2-(Dimethylaminomethyl)-1-hydroxycyclohexyl)phenol	3-{2-[(Dimethylamino)methyl]-1-hydroxycyclohexyl}phenol	73986-53-5	DTXSID40894102	CN(C)CC1CCCCC1(O)C1=CC(O)=CC=C1	InChI=1S/C15H23NO2/c1-16(2)11-13-6-3-4-9-15(13,18)12-7-5-8-14(17)10-12/h5,7-8,10,13,17-18H,3-4,6,9,11H2,1-2H3	UWJUQVWARXYRCG-UHFFFAOYSA-N	C15H23NO2	249.173
O-desmethylvenlafaxine	Level 1 - Reference Standard	O-Desmethyl Venlafaxine	4-[2-(Dimethylamino)-1-(1-hydroxycyclohexyl)ethyl]phenol	93413-62-8	DTXSID40869118	CN(C)CC(C1=CC=C(O)C=C1)C1(O)CCCCC1	InChI=1S/C16H25NO2/c1-17(2)12-15(13-6-8-14(18)9-7-13)16(19)10-4-3-5-11-16/h6-9,15,18-19H,3-5,10-12H2,1-2H3	KYYIDSXMWOZKMP-UHFFFAOYSA-N	C16H25NO2	263.189
paracetamol	Level 1 - Reference Standard	Acetaminophen	N-(4-Hydroxyphenyl)acetamide	103-90-2	DTXSID2020006	CC(=O)NC1=CC=C(O)C=C1	InChI=1S/C8H9NO2/c1-6(10)9-7-2-4-8(11)5-3-7/h2-5,11H,1H3,(H,9,10)	RZVAJINKPMORJF-UHFFFAOYSA-N	C8H9NO2	151.063
primidone	Level 1 - Reference Standard	Primidone	5-Ethyl-5-phenyl-1,3-diazinane-4,6-dione	125-33-7	DTXSID7023510	CCC1(C(=O)NCNC1=O)C1=CC=CC=C1	InChI=1S/C12H14N2O2/c1-2-12(9-6-4-3-5-7-9)10(15)13-8-14-11(12)16/h3-7H,2,8H2,1H3,(H,13,15)(H,14,16)	DQMZLTXERSFNPB-UHFFFAOYSA-N	C12H14N2O2	218.106
propazine	Level 1 - Reference Standard	Propazine	6-Chloro-N~2~,N~4~-di(propan-2-yl)-1,3,5-triazine-2,4-diamine	139-40-2	DTXSID3021196	CC(C)NC1=NC(NC(C)C)=NC(Cl)=N1	InChI=1S/C9H16ClN5/c1-5(2)11-8-13-7(10)14-9(15-8)12-6(3)4/h5-6H,1-4H3,(H2,11,12,13,14,15)	WJNRPILHGGKWCK-UHFFFAOYSA-N	C9H16ClN5	229.109
propazine-2-hydroxy	Level 1 - Reference Standard	1,3,5-Triazin-2(1H)-one, 4,6-bis((1-methylethyl)amino)-	4,6-Bis[(propan-2-yl)amino]-1,3,5-triazin-2(5H)-one	7374-53-0	DTXSID40224061	CC(C)NC1=NC(=O)N=C(NC(C)C)N1	InChI=1S/C9H17N5O/c1-5(2)10-7-12-8(11-6(3)4)14-9(15)13-7/h5-6H,1-4H3,(H3,10,11,12,13,14,15)	RUOTUMSRCIMLJK-UHFFFAOYSA-N	C9H17N5O	211.143
propranolol	Level 1 - Reference Standard	Propranolol	1-[(Naphthalen-1-yl)oxy]-3-[(propan-2-yl)amino]propan-2-ol	525-66-6	DTXSID6023525	CC(C)NCC(O)COC1=C2C=CC=CC2=CC=C1	InChI=1S/C16H21NO2/c1-12(2)17-10-14(18)11-19-16-9-5-7-13-6-3-4-8-15(13)16/h3-9,12,14,17-18H,10-11H2,1-2H3	AQHHHDLHHXJYJD-UHFFFAOYSA-N	C16H21NO2	259.157
ranitidine N-oxide	Level 1 - Reference Standard	Ranitidine-N-oxide	N,N-Dimethyl(5-{[(2-{[1-(methylamino)-2-nitrovinyl]amino}ethyl)sulfanyl]methyl}-2-furyl)methanamine N-oxide	73857-20-2	DTXSID50891465	CNC(NCCSCC1=CC=C(C[N+](C)(C)[O-])O1)=C[N+]([O-])=O	InChI=1S/C13H22N4O4S/c1-14-13(8-16(18)19)15-6-7-22-10-12-5-4-11(21-12)9-17(2,3)20/h4-5,8,14-15H,6-7,9-10H2,1-3H3	DFJVUWAHTQPQCV-UHFFFAOYSA-N	C13H22N4O4S	330.136
ranitidine-S-oxide	Level 1 - Reference Standard	Ranitidine-S-oxide	({5-[(Dimethylamino)methyl]-2-furyl}methyl)(2-{[1-(methylamino)-2-nitrovinyl]amino}ethyl)sulfoniumolate	73851-70-4	DTXSID90891464	CNC(NCC[S+]([O-])CC1=CC=C(CN(C)C)O1)=C[N+]([O-])=O	InChI=1S/C13H22N4O4S/c1-14-13(9-17(18)19)15-6-7-22(20)10-12-5-4-11(21-12)8-16(2)3/h4-5,9,14-15H,6-8,10H2,1-3H3	SKHXRNHSZTXSLP-UHFFFAOYSA-N	C13H22N4O4S	330.136
ritonavir	Level 1 - Reference Standard	Ritonavir	N-[(2S,4S,5S)-4-Hydroxy-1,6-diphenyl-5-({[(1,3-thiazol-5-yl)methoxy]carbonyl}amino)hexan-2-yl]-N~2~-(methyl{[2-(propan-2-yl)-1,3-thiazol-4-yl]methyl}carbamoyl)-L-valinamide	155213-67-5	DTXSID1048627	CC(C)[C@H](NC(=O)N(C)CC1=CSC(=N1)C(C)C)C(=O)N[C@H](C[C@H](O)[C@H](CC1=CC=CC=C1)NC(=O)OCC1=CN=CS1)CC1=CC=CC=C1	InChI=1S/C37H48N6O5S2/c1-24(2)33(42-36(46)43(5)20-29-22-49-35(40-29)25(3)4)34(45)39-28(16-26-12-8-6-9-13-26)18-32(44)31(17-27-14-10-7-11-15-27)41-37(47)48-21-30-19-38-23-50-30/h6-15,19,22-25,28,31-33,44H,16-18,20-21H2,1-5H3,(H,39,45)(H,41,47)(H,42,46)/t28-,31-,32-,33-/m0/s1	NCDNCNXCDXHOMX-XGKFQTDJSA-N	C37H48N6O5S2	720.313
roxithromycin	Level 1 - Reference Standard	Roxithromycin	-	80214-83-1	DTXSID8041117	CC[C@H]1OC(=O)[C@H](C)[C@@H](O[C@H]2C[C@@](C)(OC)[C@@H](O)[C@H](C)O2)[C@H](C)[C@@H](O[C@@H]2O[C@H](C)C[C@@H]([C@H]2O)N(C)C)[C@](C)(O)C[C@@H](C)C(=NOCOCCOC)[C@H](C)[C@@H](O)[C@]1(C)O	InChI=1S/C41H76N2O15/c1-15-29-41(10,49)34(45)24(4)31(42-53-21-52-17-16-50-13)22(2)19-39(8,48)36(58-38-32(44)28(43(11)12)18-23(3)54-38)25(5)33(26(6)37(47)56-29)57-30-20-40(9,51-14)35(46)27(7)55-30/h22-30,32-36,38,44-46,48-49H,15-21H2,1-14H3/t22-,23-,24+,25+,26-,27+,28+,29-,30+,32-,33+,34-,35+,36-,38+,39-,40-,41-/m1/s1	RXZBMPWDPOLZGW-HITVVWEBSA-N	C41H76N2O15	836.525
sulfamethoxazole	Level 1 - Reference Standard	Sulfamethoxazole	4-Amino-N-(5-methyl-1,2-oxazol-3-yl)benzene-1-sulfonamide	723-46-6	DTXSID8026064	CC1=CC(NS(=O)(=O)C2=CC=C(N)C=C2)=NO1	InChI=1S/C10H11N3O3S/c1-7-6-10(12-16-7)13-17(14,15)9-4-2-8(11)3-5-9/h2-6H,11H2,1H3,(H,12,13)	JLKIGFTWXXRPMT-UHFFFAOYSA-N	C10H11N3O3S	253.052
sulfapyridine	Level 1 - Reference Standard	Sulfapyridine	4-Amino-N-(pyridin-2-yl)benzene-1-sulfonamide	144-83-2	DTXSID3026067	NC1=CC=C(C=C1)S(=O)(=O)NC1=CC=CC=N1	InChI=1S/C11H11N3O2S/c12-9-4-6-10(7-5-9)17(15,16)14-11-3-1-2-8-13-11/h1-8H,12H2,(H,13,14)	GECHUMIMRBOMGK-UHFFFAOYSA-N	C11H11N3O2S	249.057
terbutylazine-2-hydroxy	Level 1 - Reference Standard	1,3,5-Triazin-2(1H)-one, 4-((1,1-dimethylethyl)amino)-6-(ethylamino)-	4-(tert-Butylamino)-6-(ethylamino)-1,3,5-triazin-2(5H)-one	66753-07-9	DTXSID20216888	CCNC1=NC(=O)N=C(NC(C)(C)C)N1	InChI=1S/C9H17N5O/c1-5-10-6-11-7(13-8(15)12-6)14-9(2,3)4/h5H2,1-4H3,(H3,10,11,12,13,14,15)	OYTCZOJKXCTBHG-UHFFFAOYSA-N	C9H17N5O	211.143
terbutylazine-desethyl	Level 1 - Reference Standard	Desethylterbutylazine	N~2~-tert-Butyl-6-chloro-1,3,5-triazine-2,4-diamine	30125-63-4	DTXSID80184211	CC(C)(C)NC1=NC(Cl)=NC(N)=N1	InChI=1S/C7H12ClN5/c1-7(2,3)13-6-11-4(8)10-5(9)12-6/h1-3H3,(H3,9,10,11,12,13)	LMKQNTMFZLAJDV-UHFFFAOYSA-N	C7H12ClN5	201.078
valsartan acid	Level 1 - Reference Standard	Valsartan acid	2'-(1H-Tetrazol-5-yl)[1,1'-biphenyl]-4-carboxylic acid	164265-78-5	DTXSID20881090	OC(=O)C1=CC=C(C=C1)C1=CC=CC=C1C1=NN=NN1	InChI=1S/C14H10N4O2/c19-14(20)10-7-5-9(6-8-10)11-3-1-2-4-12(11)13-15-17-18-16-13/h1-8H,(H,19,20)(H,15,16,17,18)	USAWIVMZUYOXCF-UHFFFAOYSA-N	C14H10N4O2	266.08
